# Supplementary material for: Generation of azaarene nitrile oxides from methyl azaarenes and t-BuONO enabling the synthesis of furoxans and 1,2,4-oxadiazoles
Source: Royal Society of Chemistry journal article supplement (doi:10.1039/d1qo01872h), 2022-01-01

## Supporting Information

### Generation of azaarene nitrile oxides from methyl azaarenes and *t*-BuONO enabling synthesis of furoxans and 1,2,4-oxadiazoles

Xiang-Jin Zhang,<sup>a,†</sup> Jian-Kang Cao,<sup>a,†</sup> Jun-Jie Ren,<sup>a</sup> Lin Hong,<sup>a</sup> Ru-Jin Liang,<sup>a</sup> Kai-Yan Hao,<sup>a</sup> Kai-Li Wei,<sup>a</sup> Bao-Jing Mi,<sup>a</sup> Yue Liu,<sup>a</sup> Yan-Ping Zhu<sup>\*a</sup>

<sup>a</sup> School of Pharmacy, Key Laboratory of Molecular Pharmacology and Drug Evaluation, Ministry of Education, Collaborative Innovation Center of Advanced Drug Delivery System and Biotech Drugs in Universities of Shandong, Yantai University, Shandong, Yantai, 264005, P. R. China.

E-mail: chemzyp@foxmail.com; [chemzyp@ytu.edu.cn](mailto:chemzyp@ytu.edu.cn)

<sup>†</sup> These authors contributed equally to this work.

## Table of Contents

|          |                                                                                               |            |
|----------|-----------------------------------------------------------------------------------------------|------------|
| <b>1</b> | <b>General information</b>                                                                    | <b>S3</b>  |
| <b>2</b> | <b>Evidence in support of the hypothetic mechanism</b>                                        | <b>S3</b>  |
| <b>3</b> | <b>X-ray crystal structure and crystallographic data</b>                                      | <b>S4</b>  |
| <b>4</b> | <b>Experimental Procedures</b>                                                                | <b>S6</b>  |
| <b>5</b> | <b>Characterization of products</b>                                                           | <b>S11</b> |
| <b>6</b> | <b>References</b>                                                                             | <b>S30</b> |
| <b>7</b> | <b>Copy of <math>^1\text{H}</math> and <math>^{13}\text{C}</math> NMR spectra of products</b> | <b>S30</b> |

## 1. General information

**Materials and General Experimental:** 4Å Ms was purchased from Energy Chemical. *tert*-butyl nitrite (TBN) was purchased from Shanghai Shaoyuan Co. Ltd. 2-Methylquinoline and trifluoroacetic acid were purchased from Aladdin. Unless otherwise indicated, all solvents and commercially available reagents were obtained from commercial suppliers and used without further purification. Moreover, solvent was freshly distilled prior to use unless otherwise noted. Non-commercial starting materials were prepared as described below or according to literature procedures. Analytical thin layer chromatography (TLC) was performed using pre-coated silica gel HF254 glass plates. For column chromatography, silica gel (200-300 mesh) was employed.

**Instrumentation:** The  $^1\text{H}$  NMR and  $^{13}\text{C}$  NMR spectra were recorded on Bruker Advance 400 MHz instrument at 400 MHz ( $^1\text{H}$  NMR), 100 MHz ( $^{13}\text{C}$  NMR). Using the residual solvent peak in  $\text{CDCl}_3$  as an internal reference: ( $\delta = 7.26$  for  $^1\text{H}$  and  $\delta = 77.0$  for  $^{13}\text{C}\{^1\text{H}\}$ ). Chemical shifts ( $\delta$ ) are reported in ppm, relative to the internal standard of tetramethylsilane (TMS). The coupling constants ( $J$ ) are quoted in Hz (hertz). Resonances are described as s (singlet), d (doublet), t (triplet), q (quartet), m (multiplet), br (broad) or combinations thereof. High resolution mass spectra (HRMS) were obtained on Thermo Scientific Q-Exactive (ESI mode, Q-Exactive Orbitrap MS system). Melting points were measured with SGW X-4 apparatus. Data collection for crystal structure was performed using Mo  $K\alpha$  radiation on a Bruker Smart APEX CCD area detector diffractometer.

## 2. Evidence in support of the hypothetical mechanism

To gain further insight into the reaction mechanism, some control experiments were performed as illustrated in Scheme 7. To address the possible reaction intermediate, 2-methylquinoline (**1a**) was reacted under the standard conditions for 20 mins, 3,4-di(quinolin-2-yl)-furoxan (**2a**), 2-(iodomethyl)quinoline (**1ab**) and nitrile oxides (**1ac**) could be detected by MS (APCI) (Scheme S1-S3).

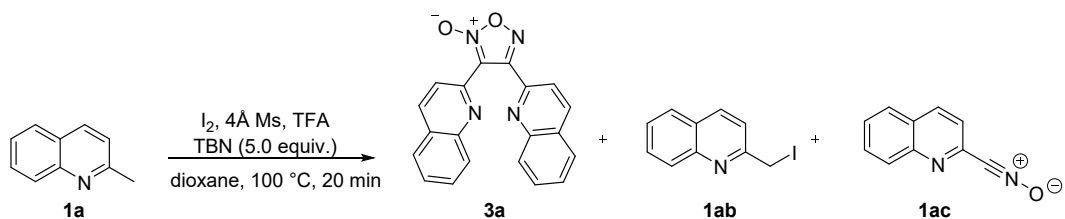

**Scheme S1.** Control experiment of **1a** with TBN.

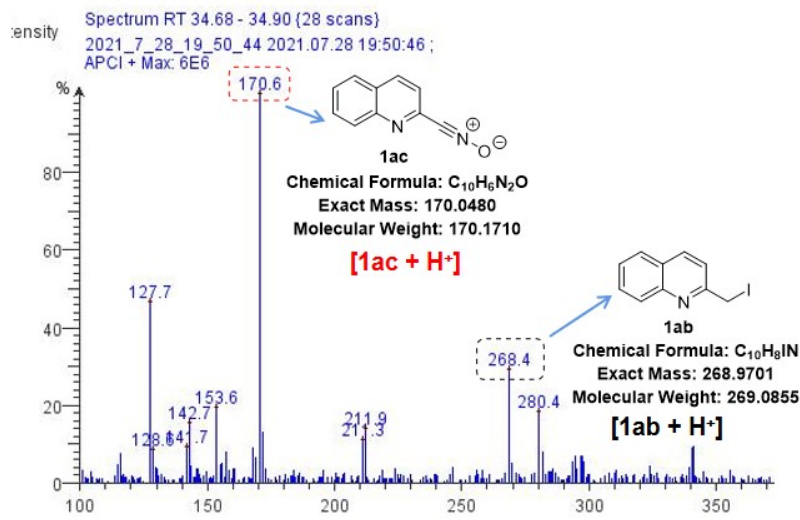

**Scheme S2.** The MS(APCI) results for the reaction of **1a** was reacted under the standard conditions for 10 mins.

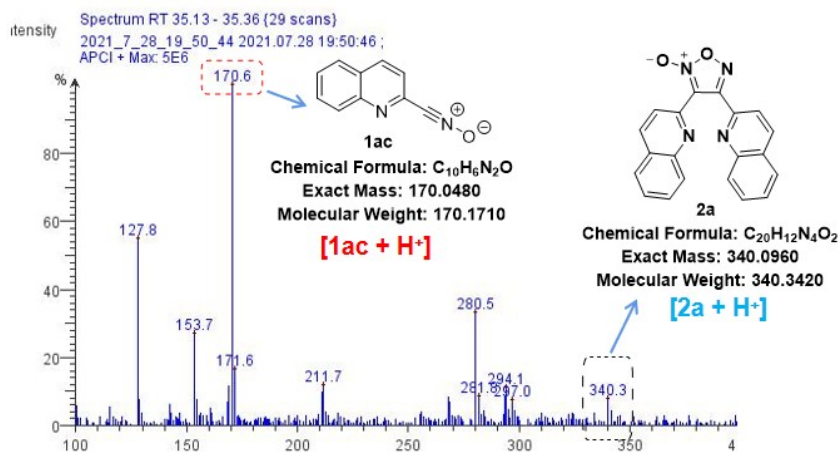

**Scheme S3.** The MS(APCI) results for the reaction of **1a** was reacted under the standard conditions for 20 mins.

### 3. X-ray crystal structure and crystallographic data

The purified compound **4p** and **5a** are dissolved in chloroform and petroleum ether, and placed in a dark cabinet to slowly evaporate. After several days, a white bulk crystal



is obtained. The X-ray crystal-structure determinations were obtained on a Bruker Smart APEX CCD area detector diffractometer at 296(2) K.

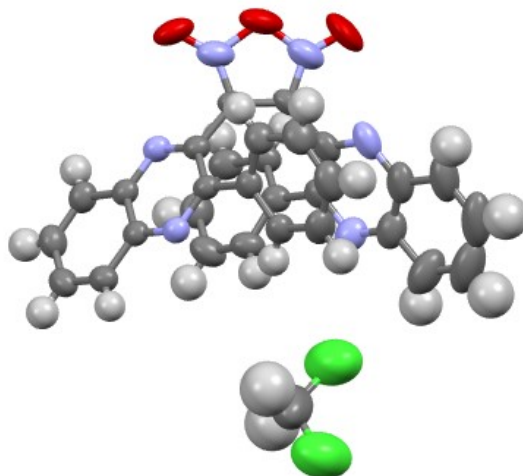

**Figure S1.** X-ray crystal structure of compound **4p** (displacement ellipsoids are drawn at the 50% probability level).

**Table S1.** Crystal data and structure refinement for compound **4p**

|                                    |                                                               |
|------------------------------------|---------------------------------------------------------------|
| Identification code                | CCDC: 2128033                                                 |
| Empirical formula                  | C <sub>30</sub> H <sub>18</sub> N <sub>6</sub> O <sub>2</sub> |
| Formula weight                     | 494.15                                                        |
| Temperature/K                      | 296 (2)                                                       |
| Crystal system                     | monoclinic                                                    |
| Space group                        | C2/c                                                          |
| a/Å                                | 17.021 (3)                                                    |
| b/Å                                | 36.936 (6)                                                    |
| c/Å                                | 8.7261 (15)                                                   |
| α/°                                | 90                                                            |
| β/°                                | 94.790 (3)                                                    |
| γ/°                                | 90                                                            |
| Volume/Å <sup>3</sup>              | 5466.9 (16)                                                   |
| Z                                  | 4                                                             |
| ρ <sub>calc</sub> /cm <sup>3</sup> | 1.305                                                         |
| μ/mm <sup>-1</sup>                 | 0.179                                                         |
| F(000)                             | 2216.0                                                        |

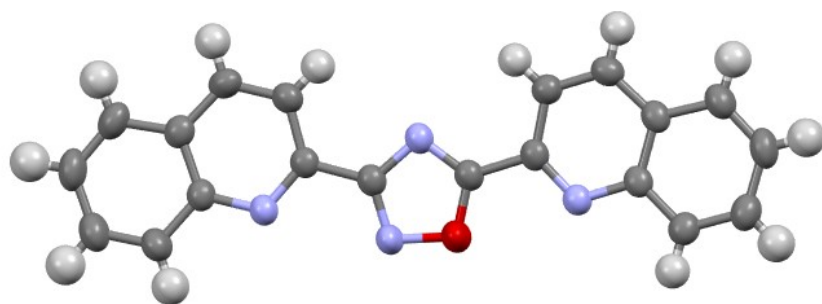

**Figure S2.** X-ray crystal structure of compound **5a** (displacement ellipsoids are drawn at the 50% probability level).

**Table S1'.** Crystal data and structure refinement for compound **5a**

|                                    |                                                  |
|------------------------------------|--------------------------------------------------|
| Identification code                | CCDC: 2141316                                    |
| Empirical formula                  | C <sub>20</sub> H <sub>12</sub> N <sub>4</sub> O |
| Formula weight                     | 324.34                                           |
| Temperature/K                      | 296 K                                            |
| Crystal system                     | monoclinic                                       |
| Space group                        | P21/n                                            |
| a/Å                                | 5.866 (2)                                        |
| b/Å                                | 9.372 (3)                                        |
| c/Å                                | 28.177 (10)                                      |
| α/°                                | 90                                               |
| β/°                                | 91.035 (5)                                       |
| γ/°                                | 90                                               |
| Volume/Å <sup>3</sup>              | 1548.8 (9)                                       |
| Z                                  | 4                                                |
| ρ <sub>calc</sub> /cm <sup>3</sup> | 1.391                                            |
| μ/mm <sup>-1</sup>                 | 0.090                                            |
| F(000)                             | 672.0                                            |

## 4. Experimental Procedures

### 4.1 Optimization of reaction conditions for the synthesis of furoxans

**Table S2.** Optimization of the reaction conditions

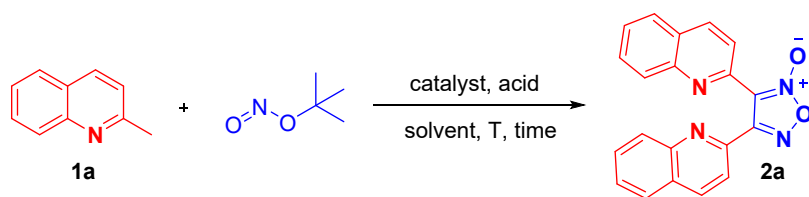

| entry                   | catalyst                                         | acid                  | solvent        | $T$ (°C)   | Yield <sup>b</sup> (%) |
|-------------------------|--------------------------------------------------|-----------------------|----------------|------------|------------------------|
| 1                       |                                                  |                       | dioxane        | 80         | 18                     |
| 2                       | I <sub>2</sub>                                   |                       | dioxane        | 80         | 29                     |
| 3                       | NH <sub>4</sub> I                                |                       | dioxane        | 80         | 25                     |
| 4                       | (NH <sub>4</sub> ) <sub>2</sub> MoO <sub>4</sub> |                       | dioxane        | 80         | 17                     |
| 5                       | CuI                                              |                       | dioxane        | 80         | 0                      |
| 6 <sup>c</sup>          | I <sub>2</sub>                                   |                       | dioxane        | 80         | 52                     |
| 7 <sup>c</sup>          | I <sub>2</sub>                                   | TFA                   | dioxane        | 80         | 78                     |
| 8 <sup>c</sup>          | I <sub>2</sub>                                   | HOAc                  | dioxane        | 80         | 27                     |
| 9 <sup>c</sup>          | I <sub>2</sub>                                   | TsOH·H <sub>2</sub> O | dioxane        | 80         | 35                     |
| 10 <sup>c</sup>         | I <sub>2</sub>                                   | TFA                   | Toluene        | 80         | 48                     |
| 11 <sup>c</sup>         | I <sub>2</sub>                                   | TFA                   | MeCN           | 80         | 37                     |
| 12 <sup>c</sup>         | I <sub>2</sub>                                   | TFA                   | EtOH           | 80         | 0                      |
| 13 <sup>c</sup>         | I <sub>2</sub>                                   | TFA                   | DMC            | 80         | 68                     |
| 14 <sup>c</sup>         | I <sub>2</sub>                                   | TFA                   | THF            | 80         | 45                     |
| 15 <sup>c</sup>         | I <sub>2</sub>                                   | TFA                   | dioxane        | 100        | 85                     |
| 16 <sup>c</sup>         | I <sub>2</sub>                                   | TFA                   | dioxane        | 60         | 45                     |
| 17 <sup>c,d</sup>       | I <sub>2</sub>                                   | TFA                   | dioxane        | 100        | 88                     |
| <b>18<sup>c,e</sup></b> | <b>I<sub>2</sub></b>                             | <b>TFA</b>            | <b>dioxane</b> | <b>100</b> | <b>92</b>              |
| 19 <sup>c,f</sup>       | I <sub>2</sub>                                   | TFA                   | dioxane        | 100        | 70                     |

<sup>a</sup> Reaction conditions: **1a** (0.2 mmol), TBN (1.0 mmol), I<sub>2</sub> (0.1 mmol), acid (0.04 mmol) were heated in dioxane (2 mL) at 100 °C for 10 h. <sup>b</sup> Isolated yields. <sup>c</sup> 4Å Ms (100 mg). <sup>d</sup> 7 h. <sup>e</sup> 5 h. <sup>f</sup> 3 h. DMC = dimethyl carbonate.

We initiated our investigation by performing the reaction of 2-methylquinoline **1a** with TBN. To our delight, dioxane as the solvent at 80 °C for 10 h led to a 18% yield (Table S2, entry 1). Subsequently, different catalysts, such as I<sub>2</sub> and NH<sub>4</sub>I, were screened for further increasing the reaction conversion, and I<sub>2</sub> was proven to be the most efficient catalyst (compare entries 3-5 with 2), providing 29% yield of **2a** (Table

S2, entry 2). To further improve the reactivity, we examined 4Å Ms as additives, gratifyingly, the isolated yield of the furoxan **2a** was found to be 52% (Table S2, entry 6). Next, several different acids were screened for improving the yield (Table S2, entries 7-9). To our surprise, when the reaction was conducted with the TFA, **2a** could be achieved with 78% yield (Table S2, entry 7). Subsequently, several solvents were examined, nevertheless, no significant enhancement was observed (Table S2, entries 10-14). As a further investigation, we screened the effect of reaction temperature and reaction time for this annulation reaction (Table S2, entries 15-19). Lower reaction time with higher temperature resulted in 92% yield of the product (Table S2, entry 18). After a series of screening, it was found that this reaction is best achieved using 2-methylquinoline (**1a**) (0.2 mmol), TBN (1.0 mmol), I<sub>2</sub> (0.1 mmol), TFA (0.04 mmol), 4Å Ms (100 mg) at 100 °C for 5 h.

#### 4.2 General Procedure for Synthesis of furoxans

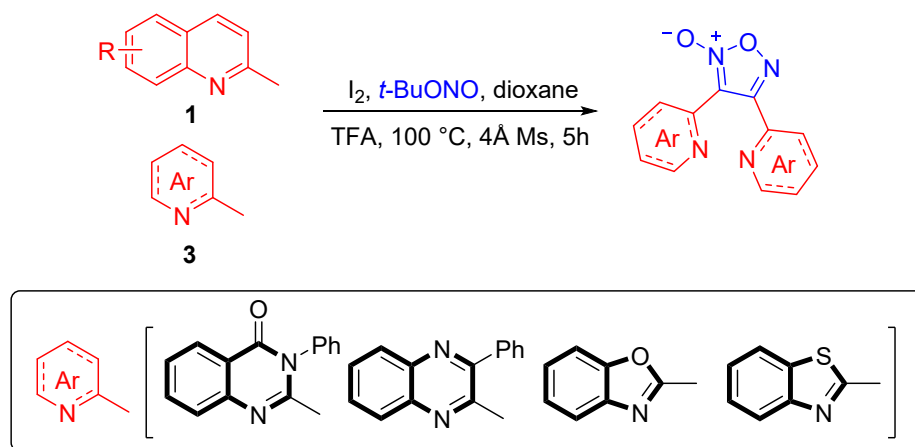

**Scheme S4.** Synthesis of furoxans.

A sealed tube was charged with methyl azaarene (**1** or **3**) (0.2 mmol), TBN (1.0 mmol), I<sub>2</sub> (0.1 mmol), TFA (0.04 mmol) and 4Å Ms (100 mg) were heated in dioxane (2 mL) at 100 °C for 5 h. After the reaction completed, and added 50 mL water to the mixture, then extracted with EtOAc 3 times (3 × 50 mL). The extract was washed with 10% Na<sub>2</sub>S<sub>2</sub>O<sub>3</sub> solution (w/w), dried over anhydrous Na<sub>2</sub>SO<sub>4</sub> and concentrated under reduced pressure. The crude residues were purified by column chromatography using ethyl acetate/petroleum ether mixture to obtain the corresponding products (Scheme S4).

#### 4.3 General Procedure for Synthesis of 1,2,4-oxadiazoles

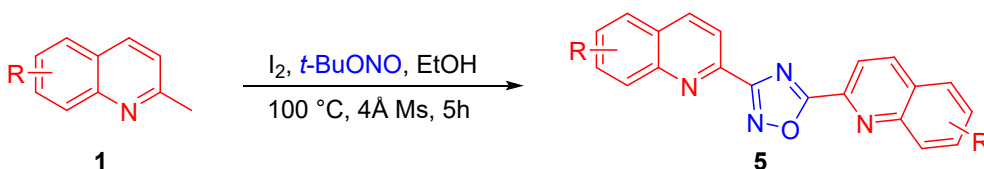

**Scheme S5.** Synthesis of 1,2,4-oxadiazoles.

A sealed tube was charged with 2-methylquinoline derivatives (**1**) (0.2 mmol), TBN (1.0 mmol), I<sub>2</sub> (0.04 mmol) and 4Å Ms (100 mg) were heated in EtOH (2 mL) at 100 °C for 5 h. After the reaction completed, and added 50 mL water to the mixture, then extracted with EtOAc 3 times (3 × 50 mL). The extract was washed with 10% Na<sub>2</sub>S<sub>2</sub>O<sub>3</sub> solution (w/w), dried over anhydrous Na<sub>2</sub>SO<sub>4</sub> and concentrated under reduced pressure. The crude residues were purified by column chromatography using ethyl acetate/petroleum ether mixture to obtain the corresponding products **5** (Scheme S5).

#### 4.4 Optimization of reaction conditions for the synthesis of 1,2,4-oxadiazoles

**Table S3.** Optimization of the reaction conditions

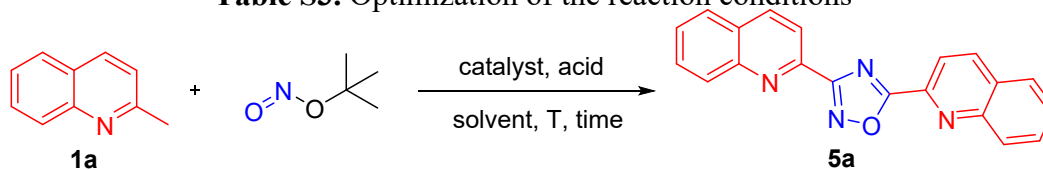

| entry    | catalyst                          | acid | solvent     | time (h) | <i>T</i> (°C) | Yield <sup>b</sup> (%) |
|----------|-----------------------------------|------|-------------|----------|---------------|------------------------|
| 1        | I <sub>2</sub> (0.5 equiv.)       | TFA  | EtOH        | 10       | 80            | 20                     |
| 2        | I <sub>2</sub> (0.5 equiv.)       | TFA  | 1-Butanol   | 10       | 80            | 12                     |
| 3        | I <sub>2</sub> (0.2 equiv.)       | TFA  | EtOH        | 10       | 80            | 28                     |
| 4        | I <sub>2</sub> (0.7 equiv.)       | TFA  | EtOH        | 10       | 80            | 26                     |
| 5        | I <sub>2</sub> (0.2 equiv.)       |      | EtOH        | 10       | 80            | 30                     |
| 6        | I <sub>2</sub> (0.2 equiv.)       |      | EtOH        | 10       | 60            | 13                     |
| 7        | I <sub>2</sub> (0.2 equiv.)       |      | EtOH        | 10       | 100           | 33                     |
| 8        | I <sub>2</sub> (0.2 equiv.)       |      | EtOH        | 7        | 100           | 35                     |
| <b>9</b> | <b>I<sub>2</sub> (0.2 equiv.)</b> |      | <b>EtOH</b> | <b>5</b> | <b>100</b>    | <b>37</b>              |
| 10       | I <sub>2</sub> (0.2 equiv.)       |      | EtOH        | 3        | 100           | 18                     |

<sup>a</sup> Reaction condition: **1** (0.2 mmol), TBN (1.0 mmol), I<sub>2</sub> (0.04 mmol) and 4Å Ms (100 mg) were heated in EtOH (2 mL) at 100 °C for 5 h. <sup>b</sup> Isolated yields.

#### 4.5 Chemical transformation of the 3,4-di(quinolin-2-yl)-1,2,5-oxadiazole 2-oxide (**2a**)<sup>1</sup>

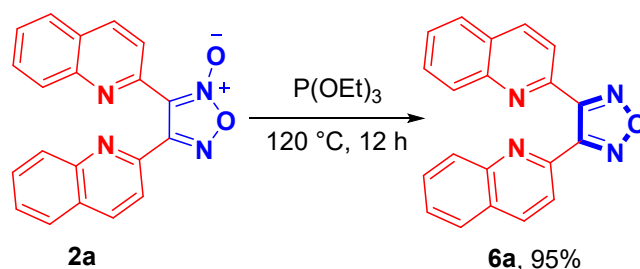

**Scheme S6.** Synthesis of furazan.

A sealed tube was charged with 3,4-di(quinolin-2-yl)-1,2,5-oxadiazole 2-oxide (**2a**) (0.2 mmol) were heated in P(OEt)<sub>3</sub> (1 mL) at 120 °C for 12 h. After the reaction completed, and added 50 mL water to the mixture, then extracted with EtOAc 3 times (3 × 50 mL) dried over anhydrous Na<sub>2</sub>SO<sub>4</sub> and concentrated under reduced pressure. The crude residues were purified by column chromatography using ethyl acetate/petroleum ether mixture to obtain the corresponding products **6a** (Scheme S6).

#### 4.6 General procedure for the preparation of 2-methylquinoline-6-carboxylate (adapted from literature)<sup>2</sup>

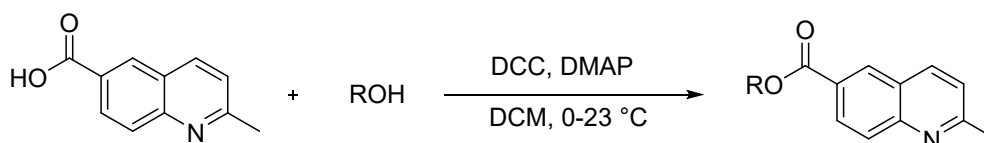

**Scheme S7.** Synthesis of 2-methylquinoline-6-carboxylate.

To a solution of ROH (1.0 equiv.) and propiolic acid (5.0 equiv.) in CH<sub>2</sub>Cl<sub>2</sub> (0.1 M, based on the ROH), a solution of DCC (4.5 equiv.) in CH<sub>2</sub>Cl<sub>2</sub> (0.5 M) was added dropwise at 0 °C. After 2 h, the ice-water cooling bath was removed and the resulting suspension was stirred vigorously at 23 °C. After full consumption of the starting material, judged by TLC, the mixture was concentrated in vacuo and redissolved in EtOAc (ca. 10 mL per mmol). The mixture was allowed at 0 °C for 1 h. The 1,3-dicyclohexylurea (DCU) was filtered and the filtrate was concentrated in vacuo. Purification by column chromatography on silica gel afforded the desired propiolates (Scheme S7).

## 5. Characterization of Products

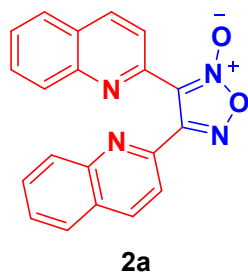

**3,4-Di(quinolin-2-yl)-1,2,5-oxadiazole 2-oxide (2a)**, (silica gel: 200–300 mesh, solvent system: petroleum ether/ethyl acetate = 10:1-1:1), 31 mg, 92%, white solid, m.p.: 147-148 °C. <sup>1</sup>H-NMR (400 MHz, CDCl<sub>3</sub>): δ (ppm) 8.30 (dd, *J* = 7.6, 6.4 Hz, 2H), 8.07 (d, *J* = 8.4 Hz, 1H), 8.00 (d, *J* = 8.8 Hz, 1H), 7.88 (ddd, *J* = 8.0, 4.4, 1.6 Hz, 2H), 7.75 (m, 2H), 7.69–7.55 (m, 4H). <sup>13</sup>C-NMR (100 MHz, CDCl<sub>3</sub>): δ (ppm) 156.4, 147.7, 147.5, 146.7, 143.9, 136.6, 136.6, 130.1, 129.7, 129.6, 128.2, 127.9, 127.9, 127.6, 127.6, 121.1, 120.6, 114.8. HRMS (ESI): *m/z* [M+H]<sup>+</sup> calcd for C<sub>20</sub>H<sub>13</sub>N<sub>4</sub>O<sub>2</sub>: 341.1033; found: 341.1030.

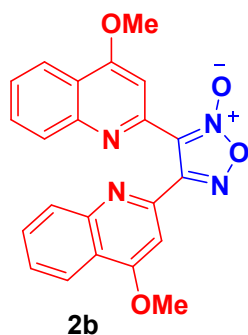

**3,4-Bis(4-methoxyquinolin-2-yl)-1,2,5-oxadiazole 2-oxide (2b)**, (silica gel: 200–300 mesh, solvent system: petroleum ether/ethyl acetate = 10:1-1:1), 34 mg, 86%, white solid, m.p.: 180-181 °C. <sup>1</sup>H-NMR (400 MHz, CDCl<sub>3</sub>): δ (ppm) 8.24–8.21 (m, 2H), 7.71–7.65 (m, 2H), 7.64–7.59 (m, 2H), 7.57–7.51 (m, 2H), 7.48 (s, 1H), 7.42 (s, 1H), 4.09 (s, 3H), 4.08 (s, 3H). <sup>13</sup>C-NMR (100 MHz, CDCl<sub>3</sub>): δ (ppm) 162.7, 162.7, 156.8, 148.5, 148.4, 147.8, 144.9, 130.3, 129.2, 129.0, 126.9, 121.8, 121.3, 121.0, 115.3, 100.6, 100.0, 56.1, 56.1. HRMS (ESI): *m/z* [M+H]<sup>+</sup> calcd for C<sub>22</sub>H<sub>17</sub>N<sub>4</sub>O<sub>4</sub>: 401.1244; found: 401.1239.

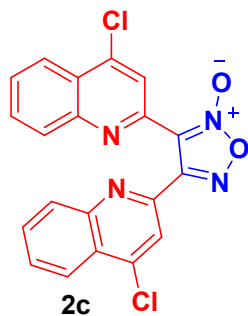

**3,4-Bis(4-chloroquinolin-2-yl)-1,2,5-oxadiazole 2-oxide (2c)**, (silica gel: 200–300 mesh, solvent system: petroleum ether/ethyl acetate = 10:1-1:1), 24 mg, 60%, white solid, m.p.: 232-233 °C. <sup>1</sup>H-NMR (400 MHz, CDCl<sub>3</sub>): δ (ppm) 8.33–8.26 (m, 3H), 8.21 (s, 1H), 7.80–7.69 (m, 6H). <sup>13</sup>C-NMR (100 MHz, CDCl<sub>3</sub>): δ (ppm) 155.4, 148.3, 148.2, 146.4, 143.6, 143.2, 131.1, 130.1, 129.9, 129.1, 126.5, 126.2, 124.1, 121.3, 120.8, 114.0. HRMS (ESI): m/z [M+H]<sup>+</sup> calcd for C<sub>20</sub>H<sub>11</sub>Cl<sub>2</sub>N<sub>4</sub>O<sub>2</sub>: 409.0254; found: 409.0256.

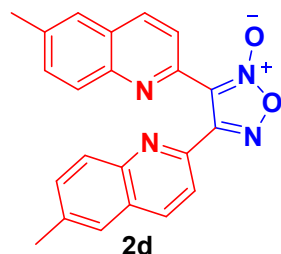

**3,4-Bis(6-methylquinolin-2-yl)-1,2,5-oxadiazole 2-oxide (2d)**, (silica gel: 200–300 mesh, solvent system: petroleum ether/ethyl acetate = 10:1-1:1), 34 mg, 92%, white solid, m.p.: 188-189 °C. <sup>1</sup>H-NMR (400 MHz, CDCl<sub>3</sub>): δ (ppm) 8.20 (t, *J* = 8.8 Hz, 2H), 8.02 (d, *J* = 8.4 Hz, 1H), 7.94 (d, *J* = 8.4 Hz, 1H), 7.69–7.60 (m, 4H), 7.49–7.45 (m, 2H), 2.54 (d, *J* = 2.0 Hz, 6H). <sup>13</sup>C-NMR (100 MHz, CDCl<sub>3</sub>): δ (ppm) 156.5, 146.4, 146.1, 145.8, 143.0, 138.1, 138.1, 135.8, 135.8, 132.4, 132.4, 129.5, 129.3, 128.3, 127.9, 126.4, 126.4, 121.1, 120.7, 114.9, 21.70. HRMS (ESI): m/z [M+H]<sup>+</sup> calcd for C<sub>22</sub>H<sub>17</sub>N<sub>4</sub>O<sub>2</sub>: 369.1346; found: 369.1343.

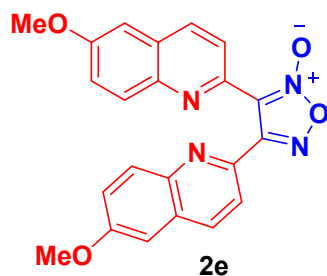

**3,4-Bis(6-methoxyquinolin-2-yl)-1,2,5-oxadiazole 2-oxide (2e)**, (silica gel: 200–300 mesh, solvent system: petroleum ether/ethyl acetate = 10:1-1:1), 32 mg, 81%, white solid, m.p.: 185-187 °C. <sup>1</sup>H-NMR (400 MHz, CDCl<sub>3</sub>): δ (ppm) 8.15 (d, *J* = 7.6 Hz, 2H), 8.04 (d, *J* = 9.6 Hz, 2H), 7.64 (d, *J* = 8.4 Hz, 2H), 7.47 (dd, *J* = 9.4, 2.6 Hz, 2H), 7.10 (d, *J* = 2.8 Hz, 2H), 3.97 (s, 6H). <sup>13</sup>C-NMR (100 MHz, CDCl<sub>3</sub>): δ (ppm) 159.9, 144.6, 135.6, 131.5, 130.7, 130.3, 124.6, 123.8, 117.8, 104.6, 55.8. HRMS (ESI): m/z [M+H]<sup>+</sup> calcd for C<sub>22</sub>H<sub>17</sub>N<sub>4</sub>O<sub>4</sub>: 401.1244; found: 401.1241.

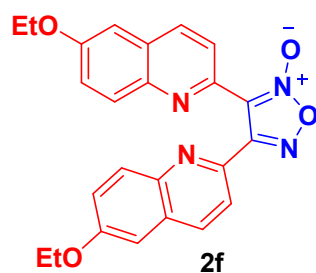



**3,4-Bis(6-ethoxyquinolin-2-yl)-1,2,5-oxadiazole 2-oxide (2f)**, (silica gel: 200–300 mesh, solvent system: petroleum ether/ethyl acetate = 10:1-1:1), 35 mg, 83%, white solid, m.p.: 179-181 °C. <sup>1</sup>H-NMR (400 MHz, CDCl<sub>3</sub>): δ (ppm) 8.15 (t, *J* = 9.4 Hz, 2H), 8.01 (d, *J* = 8.8 Hz, 1H), 7.92 (d, *J* = 8.8 Hz, 1H), 7.65 (dd, *J* = 17.6, 9.2 Hz, 2H), 7.29 (dt, *J* = 9.2, 3.0 Hz, 2H), 7.10 (dd, *J* = 4.0, 2.8 Hz, 2H), 4.17 (qd, *J* = 7.0, 1.8 Hz, 4H), 1.50 (td, *J* = 7.2, 1.0 Hz, 6H). <sup>13</sup>C-NMR (100 MHz, CDCl<sub>3</sub>): δ (ppm) 158.3, 158.2, 156.5, 144.2, 143.8, 143.6, 141.2, 135.0, 135.0, 131.2, 131.0, 129.6, 129.2, 123.4, 123.3, 121.5, 121.0, 115.0, 105.5, 105.4, 63.9, 14.7. HRMS (ESI): *m/z* [M+H]<sup>+</sup> calcd for C<sub>24</sub>H<sub>21</sub>N<sub>4</sub>O<sub>4</sub>: 429.1557; found: 429.1559.

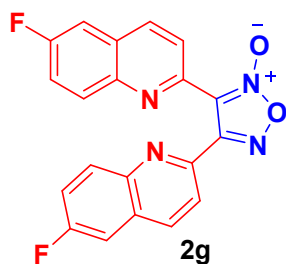

**3,4-Bis(6-fluoroquinolin-2-yl)-1,2,5-oxadiazole 2-oxide (2g)**, (silica gel: 200–300 mesh, solvent system: petroleum ether/ethyl acetate = 10:1-1:1), 30 mg, 80%, white solid, m.p.: 155-156 °C. <sup>1</sup>H-NMR (400 MHz, CDCl<sub>3</sub>): δ (ppm) 8.27 (ddd, *J* = 8.8, 4.8, 0.8 Hz, 2H), 8.09 (dd, *J* = 8.8, 0.8 Hz, 1H), 8.03 (dd, *J* = 8.8, 0.8 Hz, 1H), 7.75–7.68 (m, 2H), 7.51–7.47 (m, 2H), 7.45–7.39 (m, 2H). <sup>13</sup>C-NMR (100 MHz, CDCl<sub>3</sub>): δ (ppm) 162.5, 160.0, 156.0, 146.1 (d, *J* = 3.2 Hz), 144.7, 144.5, 143.3 (d, *J* = 3.2 Hz), 136.7 (d, *J* = 5.9 Hz), 136.0, 135.9, 132.9 (d, *J* = 9.6 Hz), 132.3 - 132.1 (m), 129.0, 128.9, 128.7, 128.5, 123.9, 121.7, 121.3, 120.7, 120.7, 120.5, 120.4, 114.5, 110.8, 110.8, 110.6, 110.5. <sup>19</sup>F {<sup>1</sup>H} NMR (376 MHz, CDCl<sub>3</sub>) δ -107.3, -110.2. HRMS (ESI): *m/z* [M+H]<sup>+</sup> calcd for C<sub>20</sub>H<sub>11</sub>F<sub>2</sub>N<sub>4</sub>O<sub>2</sub>: 377.0845; found: 377.0841.

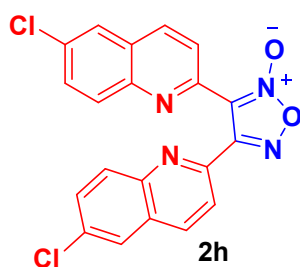

**3,4-Bis(6-chloroquinolin-2-yl)-1,2,5-oxadiazole 2-oxide (2h)**, (silica gel: 200–300 mesh, solvent system: petroleum ether/ethyl acetate = 10:1-1:1), 32 mg, 78%, white solid, m.p.: 219-220 °C. <sup>1</sup>H-NMR (400 MHz, CDCl<sub>3</sub>): δ (ppm) 8.24 (dd, *J* = 8.6, 4.2 Hz, 2H), 8.10 (d, *J* = 8.6 Hz, 1H), 8.03 (d, *J* = 8.6 Hz, 1H), 7.88 (dd, *J* = 5.6, 2.0 Hz, 2H), 7.69–7.55 (m, 4H). <sup>13</sup>C-NMR (100 MHz, CDCl<sub>3</sub>): δ (ppm) 156.0, 146.9, 146.0, 145.8, 144.2, 135.8, 133.9, 133.9, 131.3, 131.2, 131.1, 128.8, 128.4, 126.4, 126.3, 121.8, 121.5, 114.5. HRMS (ESI): *m/z* [M+H]<sup>+</sup> calcd for C<sub>20</sub>H<sub>11</sub>Cl<sub>2</sub>N<sub>4</sub>O<sub>2</sub>: 409.0254; found: 409.0251.

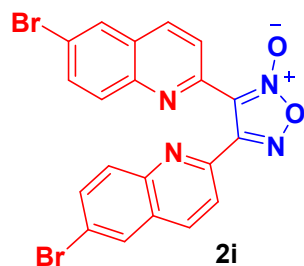

**3,4-Bis(6-bromoquinolin-2-yl)-1,2,5-oxadiazole 2-oxide (2i)**, (silica gel: 200–300 mesh, solvent system: petroleum ether/ethyl acetate = 10:1-1:1), 36 mg, 73%, white solid, m.p.: 248-249 °C. <sup>1</sup>H-NMR (400 MHz, CDCl<sub>3</sub>): δ (ppm) 8.27–8.20 (m, 2H), 8.13–8.00 (m, 4H), 7.72 (ddd, *J* = 8.8, 5.0, 2.2 Hz, 2H), 7.56 (dd, *J* = 19.6, 9.0 Hz, 2H). <sup>13</sup>C-NMR (100 MHz, CDCl<sub>3</sub>): δ (ppm) 156.0, 147.1, 146.2, 146.0, 144.3, 135.7, 133.8, 133.4, 131.3, 131.1, 129.7, 129.7, 129.2, 128.9, 122.2, 121.8, 121.5, 114.6. HRMS (ESI): *m/z* [M+H]<sup>+</sup> calcd for C<sub>20</sub>H<sub>11</sub>Br<sub>2</sub>N<sub>4</sub>O<sub>2</sub>: 496.9243; found: 496.9245.

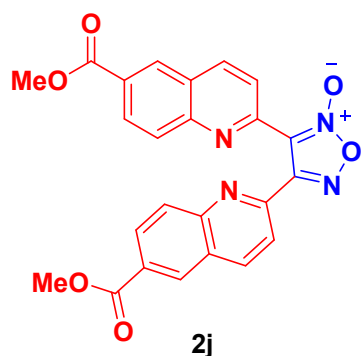

**3,4-Bis(6-(methoxycarbonyl)quinolin-2-yl)-1,2,5-oxadiazole 2-oxide (2j)**, (silica gel: 200–300 mesh, solvent system: petroleum ether/ethyl acetate = 10:1-1:1), 38 mg, 85%, white solid, m.p.: 220-221 °C. <sup>1</sup>H-NMR (400 MHz, CDCl<sub>3</sub>): δ (ppm) 8.66 (dd, *J* = 7.4, 1.8 Hz, 2H), 8.44 (dd, *J* = 8.2, 2.2 Hz, 2H), 8.22 (ddd, *J* = 9.2, 7.6, 2.0 Hz, 2H), 8.17 (d, *J* = 8.4 Hz, 1H), 8.10 (d, *J* = 8.8 Hz, 1H), 7.75 (d, *J* = 8.8 Hz, 1H), 7.68 (d, *J* = 8.8 Hz, 1H), 4.00 (d, *J* = 2.4 Hz, 6H). <sup>13</sup>C-NMR (100 MHz, CDCl<sub>3</sub>): δ (ppm) 166.3, 156.1, 148.7, 146.0, 138.1, 138.0, 130.7, 129.9, 129.7, 129.7, 129.4, 127.4, 127.0, 121.6, 121.3, 114.4, 52.58. HRMS (ESI): *m/z* [M+H]<sup>+</sup> calcd for C<sub>24</sub>H<sub>17</sub>N<sub>4</sub>O<sub>6</sub>: 457.1143; found: 457.1146.

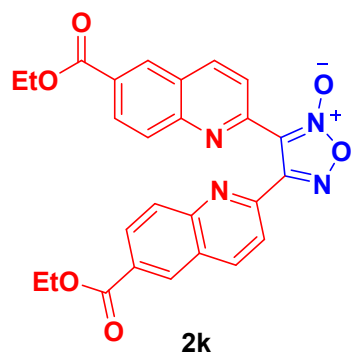

**3,4-Bis(6-(ethoxycarbonyl)quinolin-2-yl)-1,2,5-oxadiazole 2-oxide (2k)**, (silica gel: 200–300 mesh, solvent system: petroleum ether/ethyl acetate = 10:1-1:1), 42 mg, 87%, white solid, m.p.: 177-178 °C. <sup>1</sup>H-NMR (400 MHz, CDCl<sub>3</sub>): δ (ppm) 8.65 (dd, *J* = 7.6, 2.0 Hz, 2H), 8.44 (dd, *J* = 8.6, 2.2 Hz, 2H), 8.22 (td, *J* = 8.6, 2.0 Hz, 2H), 8.16 (d, *J* = 8.4 Hz, 1H), 8.08 (d, *J* = 8.4 Hz, 1H), 7.74 (d, *J* = 8.8 Hz, 1H), 7.67 (d, *J* = 9.2 Hz, 1H), 4.46 (qd, *J* = 7.2, 2.8 Hz, 4H), 1.45 (td, *J* = 7.2, 2.0 Hz, 6H). <sup>13</sup>C-NMR (100 MHz, CDCl<sub>3</sub>): δ (ppm) 165.7, 156.1, 149.3, 149.2, 148.6, 145.9, 138.0, 137.9, 130.6, 129.8, 129.7, 129.7, 129.7, 127.4, 127.0, 121.5, 121.3, 114.5, 61.56, 14.31. HRMS (ESI): *m/z* [M+H]<sup>+</sup> calcd for C<sub>26</sub>H<sub>21</sub>N<sub>4</sub>O<sub>6</sub>: 485.1456; found: 485.1455.

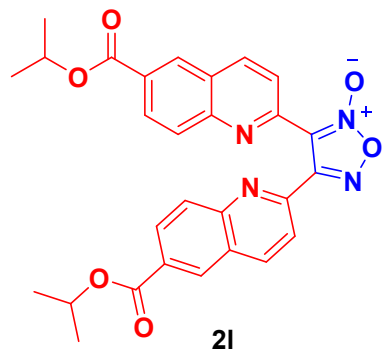

**3,4-Bis(6-(isopropoxycarbonyl)quinolin-2-yl)-1,2,5-oxadiazole 2-oxide (2l)**, (silica gel: 200–300 mesh, solvent system: petroleum ether/ethyl acetate = 10:1-1:1), 42 mg, 82%, white solid, m.p.: 175-176 °C. <sup>1</sup>H-NMR (400 MHz, CDCl<sub>3</sub>): δ (ppm) 8.63 (dd, *J* = 8.2, 1.8 Hz, 2H), 8.45 (dd, *J* = 8.6, 1.8 Hz, 2H), 8.22 (td, *J* = 8.6, 1.8 Hz, 2H), 8.17 (d, *J* = 8.8 Hz, 1H), 8.09 (d, *J* = 8.4 Hz, 1H), 7.74 (d, *J* = 8.8 Hz, 1H), 7.66 (d, *J* = 9.2 Hz, 1H), 5.36-5.29 (m, 2H), 1.43 (d, *J* = 2.4 Hz, 6H), 1.42 (d, *J* = 2.0 Hz, 6H). <sup>13</sup>C-NMR (100 MHz, CDCl<sub>3</sub>): δ (ppm) 165.3, 156.1, 149.3, 149.1, 148.6, 145.8, 138.0, 137.9, 130.5, 130.2, 130.1, 129.8, 129.7, 129.6, 127.4, 127.0, 121.5, 121.3, 114.6, 69.16, 21.94. HRMS (ESI): *m/z* [M+H]<sup>+</sup> calcd for C<sub>28</sub>H<sub>25</sub>N<sub>4</sub>O<sub>6</sub>: 513.1769; found: 513.1768.

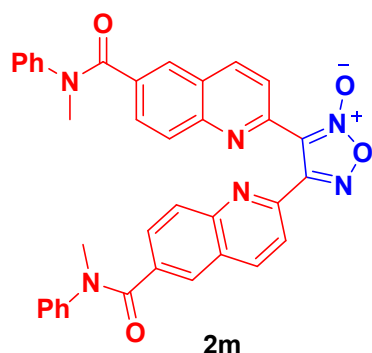

**3,4-Bis(6-(methyl(phenyl)carbamoyl)quinolin-2-yl)-1,2,5-oxadiazole 2-oxide (2m)**, (silica gel: 200–300 mesh, solvent system: petroleum ether/ethyl acetate = 10:1-1:1), 53 mg, 88%, yellow solid, m.p.: 217-218 °C. <sup>1</sup>H-NMR (400 MHz, CDCl<sub>3</sub>): δ (ppm) 8.16 (dd, *J* = 8.6, 2.6 Hz, 2H), 7.99 (d, *J* = 8.8 Hz, 1H), 7.94 (d, *J* = 8.4 Hz, 1H), 7.90 (dd, *J* = 6.8, 2.0 Hz, 2H), 7.45 (d, *J* = 8.6 Hz, 2H), 7.38 (dd, *J* = 8.8, 4.0 Hz, 2H), 7.24–7.16 (m, 4H), 7.15–7.09 (m, 2H), 7.05 (d, *J* = 7.6 Hz, 4H), 3.56 (s, 6H). <sup>13</sup>C-NMR (100

MHz, CDCl<sub>3</sub>):  $\delta$  (ppm) 169.4, 155.9, 147.7, 147.4, 147.2, 145.0, 144.3, 137.2, 135.5, 130.2, 129.7, 129.4, 129.4, 128.9, 128.8, 128.7, 128.7, 127.5, 127.3, 126.9, 126.9, 121.5, 120.9, 114.5, 38.44. HRMS (ESI):  $m/z$  [M+H]<sup>+</sup> calcd for C<sub>36</sub>H<sub>27</sub>N<sub>6</sub>O<sub>4</sub>: 607.2088; found: 607.2074.

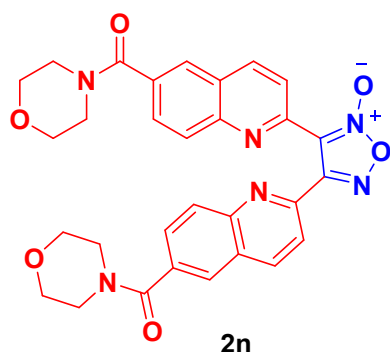

**3,4-Bis(6-(morpholine-4-carbonyl)quinolin-2-yl)-1,2,5-oxadiazole 2-oxide (2n)**, (silica gel: 200–300 mesh, solvent system: petroleum ether/ethyl acetate = 10:1-1:1), 51 mg, 90%, yellow solid, m.p.: 208-209 °C. <sup>1</sup>H-NMR (400 MHz, CDCl<sub>3</sub>):  $\delta$  (ppm) 8.36 (dd,  $J$  = 8.4, 2.0 Hz, 2H), 8.13 (d,  $J$  = 8.4 Hz, 1H), 8.07 (d,  $J$  = 8.4 Hz, 1H), 7.98 (dd,  $J$  = 7.8, 1.8 Hz, 2H), 7.75 (d,  $J$  = 8.4 Hz, 1H), 7.70 (d,  $J$  = 8.8 Hz, 1H), 7.64 (ddd,  $J$  = 8.8, 5.6, 2.0 Hz, 2H), 3.63 (m, 16H). <sup>13</sup>C-NMR (100 MHz, CDCl<sub>3</sub>):  $\delta$  (ppm) 169.3, 156.1, 147.9, 147.7, 147.5, 145.2, 137.2, 137.1, 134.8, 130.2, 130.1, 128.5, 127.7, 127.4, 126.8, 126.8, 121.7, 121.4, 114.5, 66.8. HRMS (ESI):  $m/z$  [M+H]<sup>+</sup> calcd for C<sub>30</sub>H<sub>27</sub>N<sub>6</sub>O<sub>6</sub>: 567.1987; found: 567.1985.

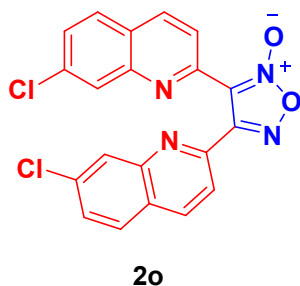

**3,4-Bis(7-chloroquinolin-2-yl)-1,2,5-oxadiazole 2-oxide (2o)**, (silica gel: 200–300 mesh, solvent system: petroleum ether/ethyl acetate = 10:1-1:1), 31 mg, 76%, white solid, m.p.: 234-235 °C. <sup>1</sup>H-NMR (400 MHz, CDCl<sub>3</sub>):  $\delta$  (ppm) 8.33 (ddd,  $J$  = 8.4, 2.8, 0.8 Hz, 2H), 8.08 (d,  $J$  = 8.4 Hz, 1H), 8.03 (d,  $J$  = 8.4 Hz, 1H), 7.85 (dd,  $J$  = 8.8, 5.8 Hz, 2H), 7.75 (d,  $J$  = 2.0 Hz, 1H), 7.71 (d,  $J$  = 2.4 Hz, 1H), 7.57 (ddd,  $J$  = 8.8, 4.0, 2.4 Hz, 2H). <sup>13</sup>C-NMR (100 MHz, CDCl<sub>3</sub>):  $\delta$  (ppm) 155.9, 147.9, 147.7, 145.0, 136.6, 136.2, 129.1, 128.9, 128.6, 128.4, 126.6, 126.1, 121.2, 120.8. HRMS (ESI):  $m/z$  [M+H]<sup>+</sup> calcd for C<sub>20</sub>H<sub>11</sub>Cl<sub>2</sub>N<sub>4</sub>O<sub>2</sub>: 409.0254; found: 409.0252.

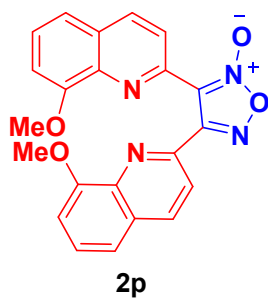

**3,4-Bis(8-methoxyquinolin-2-yl)-1,2,5-oxadiazole 2-oxide (2p)**, (silica gel: 200–300 mesh, solvent system: petroleum ether/ethyl acetate = 10:1-1:1), 29 mg, 73%, white solid, m.p.: 169-170 °C. <sup>1</sup>H-NMR (400 MHz, CDCl<sub>3</sub>): δ (ppm) 8.25 (dd, *J* = 8.6, 4.2 Hz, 2H), 8.16 (d, *J* = 8.8 Hz, 1H), 8.10 (d, *J* = 8.4 Hz, 1H), 7.50–7.44 (m, 2H), 7.41 (ddd, *J* = 8.4, 4.2, 1.4 Hz, 2H), 6.92 (ddd, *J* = 7.6, 4.2, 1.4 Hz, 2H), 3.62 (d, *J* = 2.0 Hz, 6H). <sup>13</sup>C-NMR (100 MHz, CDCl<sub>3</sub>): δ (ppm) 156.8, 155.8, 155.7, 145.4, 142.6, 139.9, 139.7, 136.5, 129.4, 129.1, 128.1, 121.9, 121.4, 119.1, 119.1, 115.3, 108.2, 108.2, 55.6, 55.6. HRMS (ESI): *m/z* [M+H]<sup>+</sup> calcd for C<sub>22</sub>H<sub>17</sub>N<sub>4</sub>O<sub>4</sub>: 401.1244; found: 401.1239.

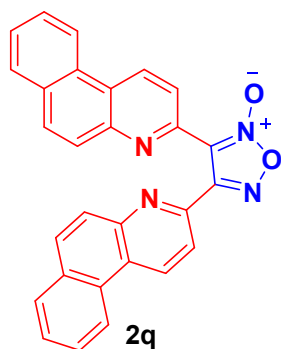

**3,4-Bis(benzo[f]quinolin-3-yl)-1,2,5-oxadiazole 2-oxide (2q)**, (silica gel: 200–300 mesh, solvent system: petroleum ether/ethyl acetate = 10:1-1:1), 35 mg, 80%, white solid, m.p.: 226-228 °C. <sup>1</sup>H-NMR (400 MHz, CDCl<sub>3</sub>): δ (ppm) 9.11 (d, *J* = 8.4 Hz, 2H), 8.68 (t, *J* = 8.0 Hz, 2H), 8.32 (d, *J* = 8.8 Hz, 1H), 8.18 (d, *J* = 8.8 Hz, 1H), 7.95–7.89 (m, 3H), 7.85 (d, *J* = 9.2 Hz, 1H), 7.78–7.73 (m, 2H), 7.73–7.69 (m, 2H), 7.64 (d, *J* = 8.8 Hz, 1H), 7.49 (d, *J* = 9.6 Hz, 1H). <sup>13</sup>C-NMR (100 MHz, CDCl<sub>3</sub>): δ (ppm) 156.5, 147.8, 147.7, 146.3, 143.2, 132.2, 132.1, 131.7, 131.6, 131.4, 131.3, 129.2, 129.2, 128.8, 128.8, 128.1, 128.0, 127.9, 127.7, 127.5, 127.5, 125.9, 125.6, 123.1, 121.3, 114.9. HRMS (ESI): *m/z* [M+H]<sup>+</sup> calcd for C<sub>28</sub>H<sub>17</sub>N<sub>4</sub>O<sub>2</sub>: 441.1346; found: 441.1343.

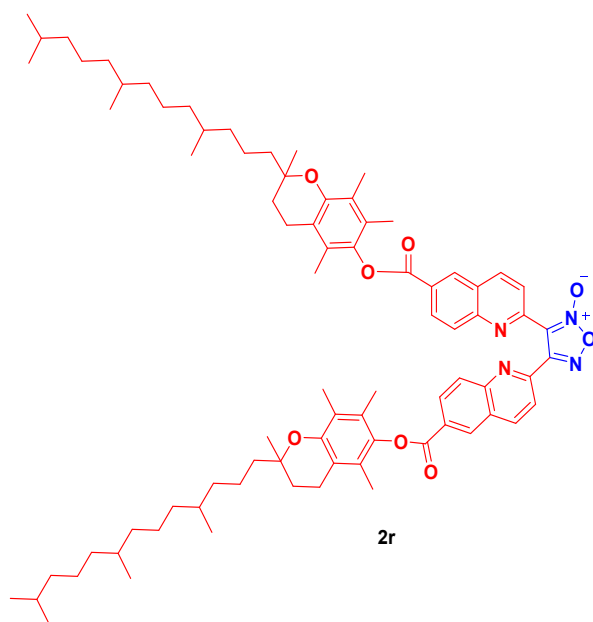

2r

**3,4-Bis(6-(((2,5,7,8-tetramethyl-2-(4,8,12-trimethyltridecyl)chroman-6-yl)oxy)carbonyl)quinolin-2-yl)-1,2,5-oxadiazole 2-oxide (2r)**, (silica gel: 200–300 mesh, solvent system: petroleum ether/ethyl acetate = 10:1-1:1), 106 mg, 85%, yellow oil.  $^1\text{H-NMR}$  (400 MHz,  $\text{CDCl}_3$ ):  $\delta$  (ppm) 8.88 (dd,  $J = 7.4, 1.8$  Hz, 2H), 8.52 (dd,  $J = 8.4, 2.8$  Hz, 2H), 8.43 (td,  $J = 9.0, 1.8$  Hz, 2H), 8.23 (d,  $J = 8.8$  Hz, 1H), 8.15 (d,  $J = 8.8$  Hz, 1H), 7.88 (d,  $J = 8.8$  Hz, 1H), 7.80 (d,  $J = 8.8$  Hz, 1H), 2.64 (t,  $J = 7.0$  Hz, 4H), 2.14 (s, 6H), 2.09 (d,  $J = 2.8$  Hz, 6H), 2.05 (d,  $J = 3.2$  Hz, 6H), 1.90–1.75 (m, 4H), 1.62–1.52 (m, 6H), 1.43–1.38 (m, 4H), 1.32–1.22 (m, 22H), 1.19–1.00 (m, 14H), 0.86 (t,  $J = 6.2$  Hz, 26H).  $^{13}\text{C-NMR}$  (100 MHz,  $\text{CDCl}_3$ ):  $\delta$  (ppm) 164.4, 156.1, 149.7, 149.6, 149.5, 148.9, 146.2, 140.5, 138.2, 131.4, 130.3, 130.1, 128.9, 127.5, 127.2, 126.7, 124.9, 123.3, 121.7, 121.5, 117.6, 114.6, 75.2, 39.4, 37.5, 37.5, 37.4, 37.3, 32.8, 27.9, 24.8, 24.4, 24.2, 23.7, 22.7, 22.6, 21.0, 20.6, 19.7, 19.7, 19.6, 19.6, 13.1, 12.3, 11.9. HRMS (ESI):  $m/z$   $[\text{M}+\text{H}]^+$  calcd for  $\text{C}_{80}\text{H}_{109}\text{N}_4\text{O}_8$ : 1253.8240; found: 1253.8251.

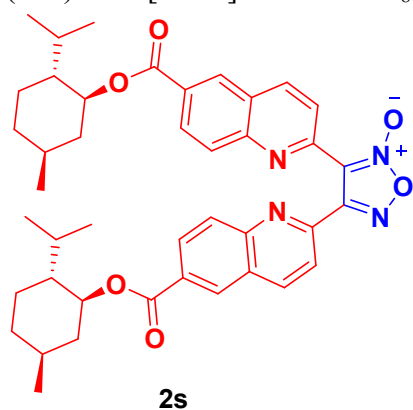

2s

**3,4-Bis(6-(((1S,2R,5S)-2-isopropyl-5-methylcyclohexyl)oxy)carbonyl)quinolin-2-yl)-1,2,5-oxadiazole 2-oxide (2s)**, (silica gel: 200–300 mesh, solvent system: petroleum ether/ethyl acetate = 10:1-1:1), 55 mg, 78%, yellow oil.  $^1\text{H-NMR}$  (400 MHz,  $\text{CDCl}_3$ ):  $\delta$  (ppm) 8.63 (dd,  $J = 8.6, 1.8$  Hz, 2H), 8.45 (dd,  $J = 8.6, 2.2$  Hz, 2H), 8.22 (td,  $J = 8.8, 1.8$  Hz, 2H), 8.16 (d,  $J = 8.8$  Hz, 1H), 8.08 (d,  $J = 8.8$  Hz, 1H), 7.75 (d,  $J = 8.8$

Hz, 1H), 7.67 (d,  $J = 8.8$  Hz, 1H), 5.04–4.97 (m, 2H), 2.20–2.12 (m, 2H), 2.05–1.90 (m, 2H), 1.78–1.72 (m, 4H), 1.64–1.54 (m, 4H), 1.15 (qd,  $J = 12.2, 2.4$  Hz, 4H), 0.98–0.91 (m, 14H), 0.81 (dd,  $J = 7.2, 2.4$  Hz, 6H).  $^{13}\text{C}$ -NMR (100 MHz,  $\text{CDCl}_3$ ):  $\delta$  (ppm) 165.2, 156.1, 149.2, 149.1, 148.6, 145.8, 138.1, 137.9, 130.5, 130.1, 130.0, 129.8, 129.7, 129.6, 127.4, 127.0, 121.4, 121.2, 114.5, 75.6, 47.2, 40.9, 34.2, 31.4, 26.5, 23.6, 21.9, 20.7, 16.5. HRMS (ESI):  $m/z$   $[\text{M}+\text{H}]^+$  calcd for  $\text{C}_{42}\text{H}_{49}\text{N}_4\text{O}_6$ : 705.3647; found: 705.3640.

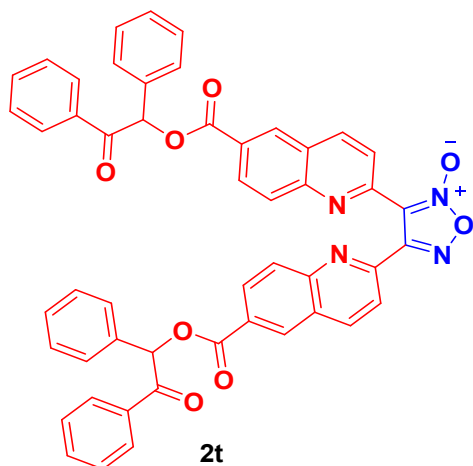

**3,4-Bis(6-((2-oxo-1,2-diphenylethoxy)carbonyl)quinolin-2-yl)-1,2,5-oxadiazole 2-oxide (2t)**, (silica gel: 200–300 mesh, solvent system: petroleum ether/ethyl acetate = 10:1-1:1), 72 mg, 89%, white solid, m.p.: 129-130 °C.  $^1\text{H}$ -NMR (400 MHz,  $\text{CDCl}_3$ ):  $\delta$  (ppm) 8.74 (dd,  $J = 9.0, 1.8$  Hz, 2H), 8.44 (dd,  $J = 8.6, 1.4$  Hz, 2H), 8.29 (ddd,  $J = 9.8, 8.8, 2.0$  Hz, 2H), 8.17 (d,  $J = 8.8$  Hz, 1H), 8.08 (d,  $J = 8.4$  Hz, 1H), 8.04–7.97 (m, 4H), 7.75 (d,  $J = 8.8$  Hz, 1H), 7.67 (d,  $J = 8.8$  Hz, 1H), 7.61 (dt,  $J = 7.8, 2.0$  Hz, 4H), 7.58–7.51 (m, 2H), 7.48–7.38 (m, 10H), 7.17 (d,  $J = 3.6$  Hz, 2H).  $^{13}\text{C}$ -NMR (100 MHz,  $\text{CDCl}_3$ ):  $\delta$  (ppm) 193.3, 165.2, 156.1, 149.5, 149.4, 148.8, 146.1, 138.2, 138.1, 134.5, 133.6, 133.5, 131.2, 130.1, 129.9, 129.8, 129.6, 129.3, 128.8, 128.7, 128.7, 128.6, 127.3, 126.9, 121.5, 121.4, 114.5, 78.5. HRMS (ESI):  $m/z$   $[\text{M}+\text{H}]^+$  calcd for  $\text{C}_{50}\text{H}_{33}\text{N}_4\text{O}_8$ : 817.2293; found: 817.2298.

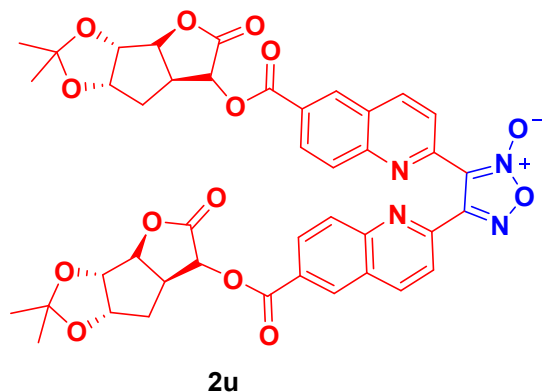

**3,4-Bis(6-(((3aS,3bR,6R,6aS,7aS)-2,2-dimethyl-5-oxohexahydro-5H-furo[2',3':3,4]cyclopenta[1,2-d][1,3]dioxol-6-yl)oxy)carbonyl)quinolin-2-yl)-1,2,5-oxadiazole 2-oxide (2u)**, (silica gel: 200–300 mesh, solvent system: petroleum

ether/ethyl acetate = 10:1-1:1), 66 mg, 81%, white solid, m.p.: 199-201 °C. <sup>1</sup>H-NMR (400 MHz, CDCl<sub>3</sub>): δ (ppm) 8.74 (dd, *J* = 9.2, 2.0 Hz, 2H), 8.46 (dd, *J* = 8.8, 2.0 Hz, 2H), 8.26 (td, *J* = 9.4, 1.8 Hz, 2H), 8.18 (d, *J* = 8.8 Hz, 1H), 8.10 (d, *J* = 8.4 Hz, 1H), 7.74 (d, *J* = 8.8 Hz, 1H), 7.66 (d, *J* = 8.8 Hz, 1H), 6.06 (dd, *J* = 3.6, 1.6 Hz, 2H), 5.81 (t, *J* = 4.0 Hz, 2H), 5.30–5.20 (m, 2H), 4.99 (t, *J* = 2.4 Hz, 2H), 4.89 (dd, *J* = 3.6, 1.6 Hz, 2H), 1.80–1.60 (m, 4H), 1.52 (s, 6H), 1.35 (s, 6H). <sup>13</sup>C-NMR (100 MHz, CDCl<sub>3</sub>): δ (ppm) 169.5, 164.5, 155.6, 149.6, 149.5, 149.1, 146.4, 138.2, 131.7, 130.2, 129.9, 129.8, 127.4, 127.3, 126.9, 121.6, 121.5, 114.5, 113.6, 107.0, 82.5, 82.3, 70.6, 33.5, 26.8, 26.5. HRMS (ESI): *m/z* [M+H]<sup>+</sup> calcd for C<sub>42</sub>H<sub>37</sub>N<sub>4</sub>O<sub>14</sub>: 821.2301; found: 821.2307.

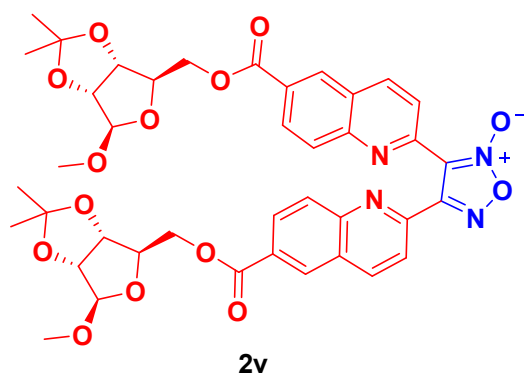

**3,4-Bis(6-(((3aR,4R,6R,6aR)-6-methoxy-2,2-dimethyltetrahydrofuro[3,4-d][1,3]dioxol-4-yl)methoxy)carbonyl)quinolin-2-yl)-1,2,5-oxadiazole 2-oxide (2v)**, (silica gel: 200–300 mesh, solvent system: petroleum ether/ethyl acetate = 10:1-1:1), 67 mg, 84%, white solid, m.p.: 124-126 °C. <sup>1</sup>H-NMR (400 MHz, CDCl<sub>3</sub>): δ (ppm) 8.68 (dd, *J* = 8.2, 1.8 Hz, 2H), 8.50–8.40 (m, 2H), 8.24 (td, *J* = 8.8, 1.6 Hz, 2H), 8.17 (d, *J* = 8.8 Hz, 1H), 8.09 (d, *J* = 8.8 Hz, 1H), 7.75 (d, *J* = 8.8 Hz, 1H), 7.68 (d, *J* = 8.8 Hz, 1H), 5.04 (d, *J* = 1.6 Hz, 2H), 4.80 (ddd, *J* = 5.4, 2.4, 1.2 Hz, 2H), 4.67 (dd, *J* = 5.8, 1.4 Hz, 2H), 4.58–4.54 (m, 2H), 4.50–4.31 (m, 4H), 3.35 (d, *J* = 1.6 Hz, 6H), 1.51 (s, 6H), 1.34 (s, 6H). <sup>13</sup>C-NMR (100 MHz, CDCl<sub>3</sub>): δ (ppm) 165.3, 155.9, 149.3, 149.2, 148.8, 146.1, 138.1, 138.0, 130.9, 130.0, 129.8, 129.7, 129.0, 128.9, 127.3, 126.9, 121.6, 121.4, 114.5, 112.7, 109.5, 85.2, 84.3, 81.8, 65.7, 54.9, 26.4, 25.0. HRMS (ESI): *m/z* [M+H]<sup>+</sup> calcd for C<sub>40</sub>H<sub>41</sub>N<sub>4</sub>O<sub>14</sub>: 801.2614; found: 801.2609.

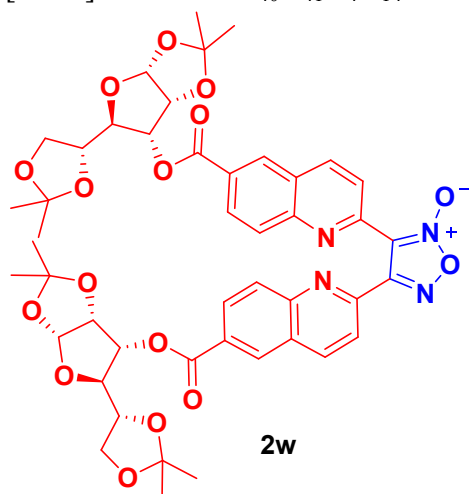



**3,4-Bis(6-(((3aR,5R,6R,6aR)-5-((R)-2,2-dimethyl-1,3-dioxolan-4-yl)-2,2-dimethyltetrahydrofuro[2,3-d][1,3]dioxol-6-yl)oxy)carbonyl)quinolin-2-yl)-1,2,5-oxadiazole 2-oxide (2w)**, (silica gel: 200–300 mesh, solvent system: petroleum ether/ethyl acetate = 10:1-1:1), 72 mg, 79%, white solid, m.p.: 115-117 °C. <sup>1</sup>H-NMR (400 MHz, CDCl<sub>3</sub>): δ (ppm) 8.67 (dd, *J* = 8.2, 1.8 Hz, 2H), 8.46 (dd, *J* = 8.6, 2.2 Hz, 2H), 8.26–8.17 (m, 3H), 8.11 (d, *J* = 8.8 Hz, 1H), 7.77 (d, *J* = 9.2 Hz, 1H), 7.70 (d, *J* = 8.8 Hz, 1H), 5.91 (dd, *J* = 3.6, 1.6 Hz, 2H), 5.18-5.12 (m, 2H), 5.02-4.97 (m, 2H), 4.39–4.34 (m, 4H), 4.13 (ddd, *J* = 8.2, 6.4, 1.6 Hz, 2H), 4.03–3.98 (m, 2H), 1.56 (s, 6H), 1.41 (d, *J* = 2.0 Hz, 6H), 1.33 (d, *J* = 5.2 Hz, 12H). <sup>13</sup>C-NMR (100 MHz, CDCl<sub>3</sub>): δ (ppm) 164.8, 155.9, 149.4, 149.3, 148.9, 146.2, 138.1, 138.1, 131.1, 130.1, 129.9, 129.6, 128.7, 128.7, 127.4, 127.0, 121.6, 121.4, 114.5, 113.3, 110.0, 104.3, 77.8, 77.8, 75.2, 73.8, 65.9, 26.7, 26.4, 24.9. HRMS (ESI): *m/z* [M+H]<sup>+</sup> calcd for C<sub>46</sub>H<sub>49</sub>N<sub>4</sub>O<sub>16</sub>: 913.3138; found: 913.3135.

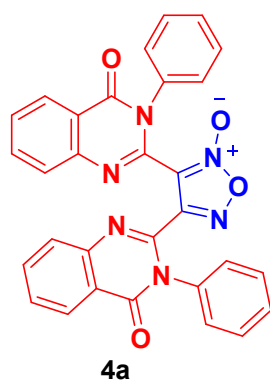

**3,4-Bis(4-oxo-3-phenyl-3,4-dihydroquinazolin-2-yl)-1,2,5-oxadiazole 2-oxide (4a)**, (silica gel: 200–300 mesh, solvent system: petroleum ether/ethyl acetate = 10:1-1:1), 50 mg, 95%, white solid, m.p.: 220-221 °C. <sup>1</sup>H-NMR (400 MHz, CDCl<sub>3</sub>): δ (ppm) 8.43 (dd, *J* = 8.0, 1.6 Hz, 1H), 8.35 (dd, *J* = 8.0, 1.6 Hz, 1H), 7.85 (ddd, *J* = 8.4, 7.0, 1.4 Hz, 1H), 7.79–7.69 (m, 2H), 7.65 (ddd, *J* = 8.2, 7.2, 1.2 Hz, 1H), 7.59 (ddd, *J* = 8.2, 7.2, 1.2 Hz, 1H), 7.50–7.39 (m, 8H), 7.33 (dd, *J* = 8.0, 1.2 Hz, 1H), 7.25–7.21 (m, 2H). <sup>13</sup>C-NMR (100 MHz, CDCl<sub>3</sub>): δ (ppm) 161.2, 150.3, 147.0, 145.9, 141.6, 141.3, 135.9, 135.4, 135.3, 135.1, 130.0, 129.7, 129.5, 129.4, 129.3, 128.9, 128.5, 128.2, 127.8, 127.7, 127.6, 127.5, 121.7, 121.6, 111.6. HRMS (ESI): *m/z* [M+H]<sup>+</sup> calcd for C<sub>30</sub>H<sub>19</sub>N<sub>6</sub>O<sub>4</sub>: 527.1462; found: 527.1460.

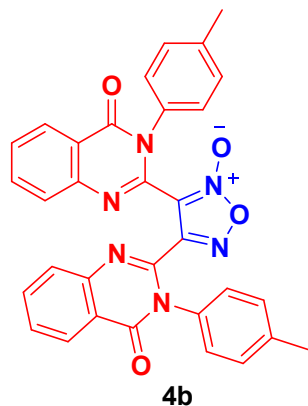

**3,4-Bis(4-oxo-3-(p-tolyl)-3,4-dihydroquinazolin-2-yl)-1,2,5-oxadiazole 2-oxide (4b)**, (silica gel: 200–300 mesh, solvent system: petroleum ether/ethyl acetate = 10:1-1:1), 50 mg, 90%, white solid, m.p.: 214-216 °C. <sup>1</sup>H-NMR (400 MHz, CDCl<sub>3</sub>): δ (ppm) 8.43 (dd, *J* = 8.4, 1.6 Hz, 1H), 8.34 (dd, *J* = 8.0, 1.2 Hz, 1H), 7.85 (ddd, *J* = 8.5, 7.0, 1.6 Hz, 1H), 7.77 (dd, *J* = 8.4, 1.2 Hz, 1H), 7.72 (ddd, *J* = 8.4, 7.2, 1.4 Hz, 1H), 7.64 (ddd, *J* = 8.2, 7.0, 1.2 Hz, 1H), 7.58 (ddd, *J* = 8.2, 7.2, 1.2 Hz, 1H), 7.32–7.20 (m, 7H), 7.08 (d, *J* = 8.0 Hz, 2H), 2.41 (d, *J* = 7.6 Hz, 6H). <sup>13</sup>C-NMR (100 MHz, CDCl<sub>3</sub>): δ (ppm) 161.3, 150.4, 147.0, 145.9, 141.7, 141.5, 140.2, 139.8, 135.2, 134.9, 133.2, 132.7, 130.1, 130.0, 129.2, 128.8, 128.1, 127.7, 127.5, 127.4, 127.3, 121.6, 121.6, 111.6, 21.3, 21.2. HRMS (ESI): *m/z* [M+H]<sup>+</sup> calcd for C<sub>32</sub>H<sub>23</sub>N<sub>6</sub>O<sub>4</sub>: 555.1775; found: 555.1772.

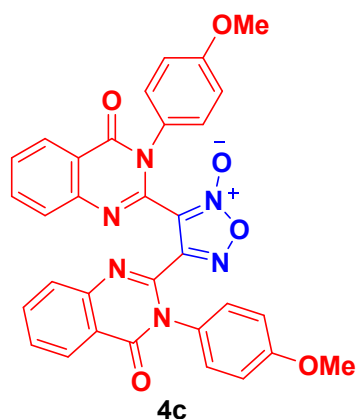

**3,4-Bis(3-(4-methoxyphenyl)-4-oxo-3,4-dihydroquinazolin-2-yl)-1,2,5-oxadiazole 2-oxide (4c)**, (silica gel: 200–300 mesh, solvent system: petroleum ether/ethyl acetate = 10:1-1:1), 52 mg, 89%, white solid, m.p.: 107-108 °C. <sup>1</sup>H-NMR (400 MHz, CDCl<sub>3</sub>): δ (ppm) 8.42 (dd, *J* = 8.0, 1.6 Hz, 1H), 8.34 (dd, *J* = 8.2, 1.4 Hz, 1H), 7.83 (ddd, *J* = 8.4, 7.2, 1.6 Hz, 1H), 7.77–7.68 (m, 2H), 7.63 (ddd, *J* = 8.2, 7.2, 1.2 Hz, 1H), 7.57 (ddd, *J* = 8.2, 7.2, 1.2 Hz, 1H), 7.38–7.29 (m, 3H), 7.22–7.09 (m, 2H), 7.00–6.92 (m, 2H), 6.92–6.85 (m, 2H), 3.85 (s, 3H), 3.82 (s, 3H). <sup>13</sup>C-NMR (100 MHz, CDCl<sub>3</sub>): δ (ppm) 161.5, 160.5, 160.3, 150.9, 147.1, 145.6, 142.4, 141.6, 135.2, 134.9, 129.5, 129.2, 128.8, 128.4, 128.1, 127.7, 127.6, 127.5, 121.7, 114.7, 114.5, 55.49. HRMS (ESI): *m/z* [M+H]<sup>+</sup> calcd for C<sub>32</sub>H<sub>23</sub>N<sub>6</sub>O<sub>6</sub>: 587.1674; found: 587.1673.

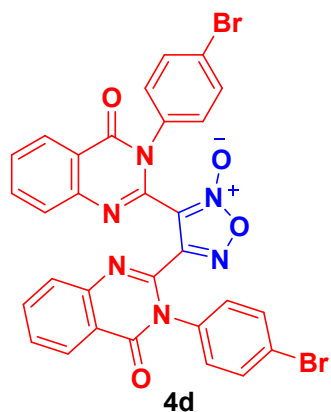

**3,4-Bis(3-(4-bromophenyl)-4-oxo-3,4-dihydroquinazolin-2-yl)-1,2,5-oxadiazole 2-oxide (4d)**, (silica gel: 200–300 mesh, solvent system: petroleum ether/ethyl acetate = 10:1-1:1), 56 mg, 83%, white solid, m.p.: 247-249 °C. <sup>1</sup>H-NMR (400 MHz, CDCl<sub>3</sub>): δ (ppm) 8.41 (dd, *J* = 8.0, 1.2 Hz, 1H), 8.34 (dd, *J* = 8.0, 1.6 Hz, 1H), 7.85 (ddd, *J* = 8.6, 7.2, 1.6 Hz, 1H), 7.78–7.70 (m, 2H), 7.66–7.61 (m, 3H), 7.61–7.51 (m, 3H), 7.38–7.32 (m, 3H), 7.20–7.15 (m, 2H). <sup>13</sup>C-NMR (100 MHz, CDCl<sub>3</sub>): δ (ppm) 161.0, 160.9, 150.2, 146.8, 145.7, 141.2, 140.6, 135.5, 135.2, 134.8, 134.2, 132.8, 132.6, 130.1, 129.5, 129.4, 129.1, 128.2, 127.7, 127.7, 127.5, 124.4, 124.1, 121.4, 111.3. HRMS (ESI): *m/z* [M+H]<sup>+</sup> calcd for C<sub>30</sub>H<sub>17</sub>Br<sub>2</sub>N<sub>6</sub>O<sub>4</sub>: 682.9673; found: 682.9670.

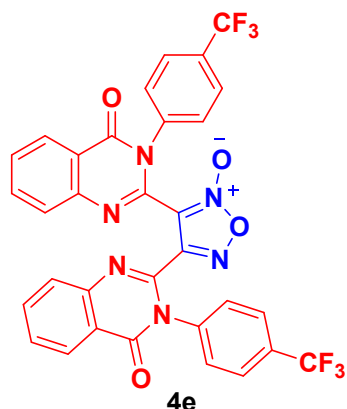

**3,4-Bis(4-oxo-3-(4-(trifluoromethyl)phenyl)-3,4-dihydroquinazolin-2-yl)-1,2,5-oxadiazole 2-oxide (4e)**, (silica gel: 200–300 mesh, solvent system: petroleum ether/ethyl acetate = 10:1-1:1), 57 mg, 86%, white solid, m.p.: 200-201 °C. <sup>1</sup>H-NMR (400 MHz, CDCl<sub>3</sub>): δ (ppm) 8.43 (dd, *J* = 8.0, 1.6 Hz, 1H), 8.36 (dd, *J* = 8.0, 1.6 Hz, 1H), 7.86 (ddd, *J* = 8.4, 7.0, 1.4 Hz, 1H), 7.82–7.56 (m, 10H), 7.48 (d, *J* = 8.0 Hz, 2H), 7.41 (d, *J* = 8.0 Hz, 1H). <sup>13</sup>C-NMR (100 MHz, CDCl<sub>3</sub>): δ (ppm) 160.9, 160.8, 150.1, 146.7, 145.7, 141.0, 140.2, 139.0, 138.2, 135.6, 135.4, 132.3 – 131.8 (m), 129.7, 129.3, 129.2, 128.6, 128.2, 127.7, 127.7, 127.5, 126.7, 126.7, 126.5, 126.4, 124.8 (d, *J* = 10.0 Hz), 122.0 (d, *J* = 6.0 Hz), 121.4, 121.4, 111.2. <sup>19</sup>F {<sup>1</sup>H} NMR (376 MHz, CDCl<sub>3</sub>) δ - 62.6, -62.7. HRMS (ESI): *m/z* [M+H]<sup>+</sup> calcd for C<sub>32</sub>H<sub>17</sub>F<sub>6</sub>N<sub>6</sub>O<sub>4</sub>: 663.1210; found: 663.1210.

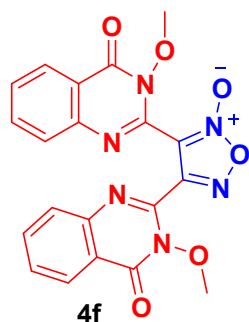

**3,4-Bis(3-methoxy-4-oxo-3,4-dihydroquinazolin-2-yl)-1,2,5-oxadiazole 2-oxide (4f)**, (silica gel: 200–300 mesh, solvent system: petroleum ether/ethyl acetate = 10:1-1:1), 34 mg, 79%, white solid, m.p.: 219-220 °C. <sup>1</sup>H-NMR (400 MHz, CDCl<sub>3</sub>): δ (ppm) 8.38 (dd, *J* = 8.0, 1.6 Hz, 1H), 8.30 (dd, *J* = 8.0, 1.6 Hz, 1H), 7.82 (ddd, *J* = 8.6, 7.2,

1.6 Hz, 1H), 7.73 (d,  $J = 7.2$  Hz, 1H), 7.71–7.59 (m, 2H), 7.54 (ddd,  $J = 8.2, 7.2, 1.2$  Hz, 1H), 7.28 (dd,  $J = 8.2, 1.2$  Hz, 1H), 4.22 (s, 3H), 4.11 (s, 3H).  $^{13}\text{C-NMR}$  (100 MHz,  $\text{CDCl}_3$ ):  $\delta$  (ppm) 157.2, 157.0, 149.4, 147.0, 145.9, 145.1, 143.9, 140.8, 139.7, 134.9, 134.9, 134.3, 128.9, 128.8, 128.4, 128.2, 127.8, 127.4, 126.9, 126.6, 123.2, 123.1, 108.9, 65.9, 65.7. HRMS (ESI):  $m/z$   $[\text{M}+\text{H}]^+$  calcd for  $\text{C}_{20}\text{H}_{15}\text{N}_6\text{O}_6$ : 435.1048; found: 435.1044.

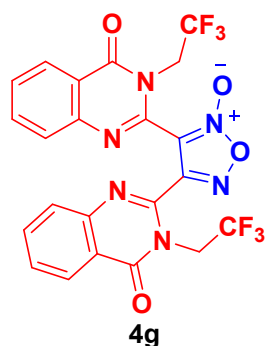

**3,4-Bis(4-oxo-3-(2,2,2-trifluoroethyl)-3,4-dihydroquinazolin-2-yl)-1,2,5-oxadiazole 2-oxide (4g)**, (silica gel: 200–300 mesh, solvent system: petroleum ether/ethyl acetate = 10:1-1:1), 43 mg, 81%, white solid, m.p.: 207-208 °C.  $^1\text{H-NMR}$  (400 MHz,  $\text{CDCl}_3$ ):  $\delta$  (ppm) 8.41 (ddd,  $J = 8.0, 1.6, 0.8$  Hz, 1H), 8.31 (ddd,  $J = 8.0, 1.6, 0.4$  Hz, 1H), 7.81 (ddd,  $J = 8.4, 7.0, 1.6$  Hz, 1H), 7.72–7.61 (m, 3H), 7.57 (ddd,  $J = 8.2, 7.2, 1.2$  Hz, 1H), 7.10 (dd,  $J = 8.0, 1.2$  Hz, 1H), 5.59 (q,  $J = 8.0$  Hz, 2H), 4.88 (q,  $J = 8.4$  Hz, 2H).  $^{13}\text{C-NMR}$  (100 MHz,  $\text{CDCl}_3$ ):  $\delta$  (ppm) 161.0, 160.5, 151.3, 146.2, 144.9, 140.6, 140.3, 135.8, 135.5, 130.0, 129.4, 128.3, 127.7, 127.6, 127.5, 124.6, 124.3, 121.8, 121.5, 120.6, 120.5, 110.5, 45.4–44.3 (m), 43.8–42.7 (m).  $^{19}\text{F}\{^1\text{H}\}$  NMR (376 MHz,  $\text{CDCl}_3$ )  $\delta$  -68.9, -69.0. HRMS (ESI):  $m/z$   $[\text{M}+\text{H}]^+$  calcd for  $\text{C}_{22}\text{H}_{13}\text{F}_6\text{N}_6\text{O}_4$ : 539.0897; found: 539.0897.

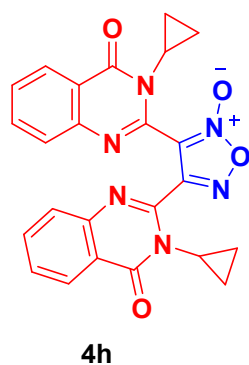

**3,4-Bis(3-cyclopropyl-4-oxo-3,4-dihydroquinazolin-2-yl)-1,2,5-oxadiazole 2-oxide (4h)**, (silica gel: 200–300 mesh, solvent system: petroleum ether/ethyl acetate = 10:1-1:1), 39 mg, 86%, white solid, m.p.: 203-204 °C.  $^1\text{H-NMR}$  (400 MHz,  $\text{CDCl}_3$ ):  $\delta$  (ppm) 8.33–8.25 (m, 2H), 7.69–7.61 (m, 2H), 7.54–7.47 (m, 2H), 7.45 (d,  $J = 8.0$  Hz, 1H), 7.28 (dd,  $J = 8.2, 1.0$  Hz, 1H), 3.51–3.40 (m, 2H), 1.44–0.96 (m, 8H).  $^{13}\text{C-NMR}$  (100 MHz,  $\text{CDCl}_3$ ):  $\delta$  (ppm) 162.2, 162.2, 151.5, 146.1, 145.6, 144.3, 142.8, 134.5, 134.4, 128.7, 128.5, 127.7, 127.6, 126.8, 126.8, 121.6, 121.5, 112.4, 29.3, 27.3, 10.6, 7.6. HRMS (ESI):  $m/z$   $[\text{M}+\text{H}]^+$  calcd for  $\text{C}_{24}\text{H}_{19}\text{N}_6\text{O}_4$ : 455.1462; found: 455.1461.

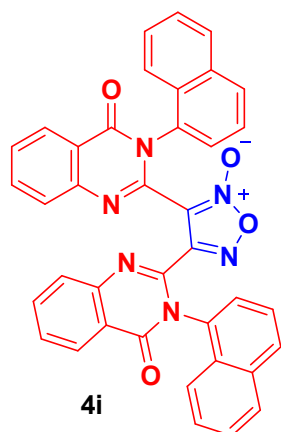

**3,4-Bis(3-(naphthalen-1-yl)-4-oxo-3,4-dihydroquinazolin-2-yl)-1,2,5-oxadiazole 2-oxide (4i)**, (silica gel: 200–300 mesh, solvent system: petroleum ether/ethyl acetate = 10:1-1:1), 50 mg, 80%, white solid, m.p.: 175-177 °C. <sup>1</sup>H-NMR (400 MHz, CDCl<sub>3</sub>): δ (ppm) 8.54–8.46 (m, 1H), 8.38–8.31 (m, 1H), 8.04–7.83 (m, 6H), 7.81–7.70 (m, 2H), 7.67–7.60 (m, 1H), 7.57–7.35 (m, 6H), 7.31–7.19 (m, 4H), 7.05–6.68 (m, 1H). <sup>13</sup>C-NMR (100 MHz, CDCl<sub>3</sub>): δ (ppm) 161.1, 160.8, 149.5, 149.1, 147.3, 146.0, 142.4, 142.0, 135.4, 134.1, 133.8, 132.7, 132.2, 132.1, 130.9, 130.8, 130.4, 130.2, 129.3, 129.1, 129.0, 128.5, 128.3, 127.8, 127.6, 127.5, 127.2, 126.9, 126.8, 126.6, 126.4, 125.6, 125.3, 124.8, 122.9, 121.4, 120.4, 111.2. HRMS (ESI): m/z [M+H]<sup>+</sup> calcd for C<sub>38</sub>H<sub>23</sub>N<sub>6</sub>O<sub>4</sub>: 627.1775; found: 627.1776.

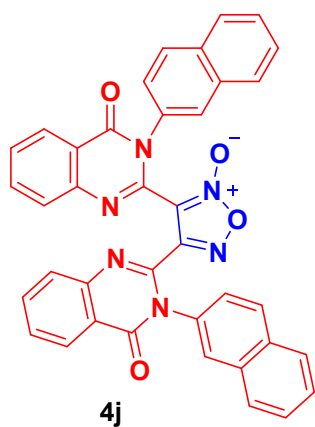

**3,4-Bis(3-(naphthalen-2-yl)-4-oxo-3,4-dihydroquinazolin-2-yl)-1,2,5-oxadiazole 2-oxide (4j)**, (silica gel: 200–300 mesh, solvent system: petroleum ether/ethyl acetate = 10:1-1:1), 49 mg, 78%, white solid, m.p.: 150-152 °C. <sup>1</sup>H-NMR (400 MHz, CDCl<sub>3</sub>): δ (ppm) 8.47 (dt, *J* = 8.2, 2.0 Hz, 1H), 8.39 (dd, *J* = 8.0, 1.6 Hz, 1H), 7.99–7.29 (m, 19H), 7.05 (dd, *J* = 27.8, 8.2 Hz, 1H). <sup>13</sup>C-NMR (100 MHz, CDCl<sub>3</sub>): δ (ppm) 161.3, 161.3, 150.1, 147.0, 145.9, 145.9, 141.7, 141.6, 141.5, 141.4, 135.4, 135.1, 133.4, 133.2, 133.0, 132.7, 129.5, 129.4, 129.3, 129.2, 128.9, 128.4, 128.3, 128.2, 127.8, 127.8, 127.6, 127.4, 127.2, 126.9, 126.7, 125.6, 125.5, 124.9, 124.6, 121.6, 121.6, 111.4. HRMS (ESI): m/z [M+H]<sup>+</sup> calcd for C<sub>38</sub>H<sub>23</sub>N<sub>6</sub>O<sub>4</sub>: 627.1775; found: 627.1771.

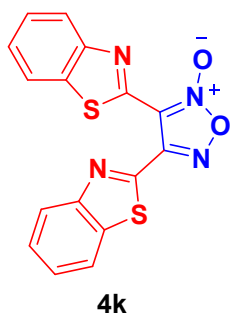

**3,4-Bis(benzo[d]thiazol-2-yl)-1,2,5-oxadiazole 2-oxide (4k)**, (silica gel: 200–300 mesh, solvent system: petroleum ether/ethyl acetate = 10:1-1:1), 15 mg, 42%, white solid, m.p.: 165-166 °C. <sup>1</sup>H-NMR (400 MHz, CDCl<sub>3</sub>): δ (ppm) 8.26 (dd, *J* = 7.6, 1.6 Hz, 1H), 8.15 (dd, *J* = 8.2, 2.0 Hz, 1H), 8.10–8.01 (m, 2H), 7.67–7.49 (m, 4H). <sup>13</sup>C-NMR (100 MHz, CDCl<sub>3</sub>): δ (ppm) 152.9, 152.5, 152.1, 150.3, 149.4, 136.1, 135.0, 127.1, 127.0, 126.9, 124.7, 124.2, 121.7, 121.7. HRMS (ESI): *m/z* [M+H]<sup>+</sup> calcd for C<sub>16</sub>H<sub>9</sub>N<sub>4</sub>O<sub>2</sub>S<sub>2</sub>: 353.0161; found: 353.0163.

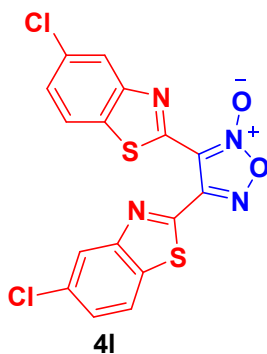

**3,4-Bis(5-chlorobenzo[d]thiazol-2-yl)-1,2,5-oxadiazole 2-oxide (4l)**, (silica gel: 200–300 mesh, solvent system: petroleum ether/ethyl acetate = 10:1-1:1), 16 mg, 39%, white solid, m.p.: 190-191 °C. <sup>1</sup>H-NMR (400 MHz, CDCl<sub>3</sub>): δ (ppm) 8.24 (dd, *J* = 2.0, 0.8 Hz, 1H), 8.12 (dd, *J* = 2.0, 0.8 Hz, 1H), 7.98 (dd, *J* = 14.8, 8.4 Hz, 2H), 7.57 (dd, *J* = 8.8, 2.0 Hz, 1H), 7.52 (dd, *J* = 8.8, 2.0 Hz, 1H). <sup>13</sup>C-NMR (100 MHz, CDCl<sub>3</sub>): δ (ppm) 153.6, 153.2, 151.3, 149.8, 134.4, 133.3, 133.1, 130.2, 127.8, 127.6, 124.3, 123.7, 122.5, 122.5, 111.5. HRMS (ESI): *m/z* [M+H]<sup>+</sup> calcd for C<sub>16</sub>H<sub>7</sub>Cl<sub>2</sub>N<sub>4</sub>O<sub>2</sub>S<sub>2</sub>: 420.9382; found: 420.9380.

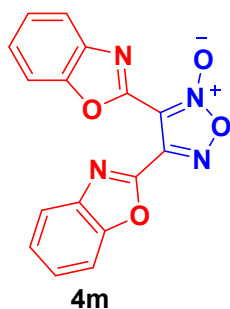

**3,4-Bis(benzo[d]oxazol-2-yl)-1,2,5-oxadiazole 2-oxide (4m)**, (silica gel: 200–300 mesh, solvent system: petroleum ether/ethyl acetate = 10:1-1:1), 22 mg, 70%, white

solid, m.p.: 145-147 °C. <sup>1</sup>H-NMR (400 MHz, CDCl<sub>3</sub>): δ (ppm) 7.95–7.85 (m, 2H), 7.70 (dt, *J* = 8.4, 0.8 Hz, 1H), 7.66–7.61 (m, 1H), 7.58–7.44 (m, 4H). <sup>13</sup>C-NMR (100 MHz, CDCl<sub>3</sub>): δ (ppm) 150.7, 150.5, 148.1, 145.2, 140.9, 127.7, 127.3, 125.7, 125.7, 121.6, 121.4, 111.4, 111.3. HRMS (ESI): *m/z* [M+H]<sup>+</sup> calcd for C<sub>16</sub>H<sub>9</sub>N<sub>4</sub>O<sub>4</sub>: 321.0618; found: 321.0616.

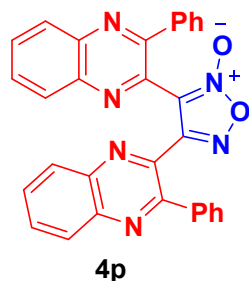

**3,4-Bis(3-phenylquinoxalin-2-yl)-1,2,5-oxadiazole 2-oxide (4p)**, (silica gel: 200–300 mesh, solvent system: petroleum ether/ethyl acetate = 10:1-1:1), 40 mg, 82%, white solid, m.p.: 164-166 °C. <sup>1</sup>H-NMR (400 MHz, CDCl<sub>3</sub>): δ (ppm) 8.14 (m, 2H), 7.92–7.84 (m, 3H), 7.83–7.72 (m, 3H), 7.22–7.19 (m, 2H), 7.18–7.11 (m, 4H), 7.05–6.96 (m, 4H). <sup>13</sup>C-NMR (100 MHz, CDCl<sub>3</sub>): δ (ppm) 155.3, 152.8, 152.3, 142.0, 141.8, 140.8, 140.5, 139.6, 137.7, 136.29, 131.98, 130.59, 130.49, 129.70, 129.59, 129.56, 129.54, 129.31, 129.27, 128.66, 128.57, 128.52, 127.86, 113.92, 77.32, 77.00, 76.68. HRMS (ESI): *m/z* [M+H]<sup>+</sup> calcd for C<sub>30</sub>H<sub>19</sub>N<sub>6</sub>O<sub>2</sub>: 495.1564; found: 495.1564.

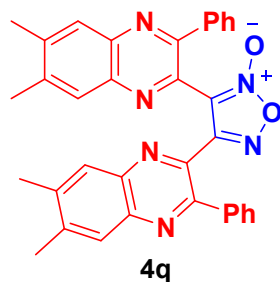

**3,4-Bis(6,7-dimethyl-3-phenylquinoxalin-2-yl)-1,2,5-oxadiazole 2-oxide (4q)**, (silica gel: 200–300 mesh, solvent system: petroleum ether/ethyl acetate = 10:1-1:1), 40 mg, 73%, white solid, m.p.: 218-220 °C. <sup>1</sup>H-NMR (400 MHz, CDCl<sub>3</sub>): δ (ppm) 7.88 (d, *J* = 4.4 Hz, 2H), 7.63 (s, 1H), 7.53 (s, 1H), 7.25 (t, *J* = 1.4 Hz, 1H), 7.24–7.19 (m, 3H), 7.19–7.13 (m, 2H), 7.10–7.01 (m, 4H), 2.54 (d, *J* = 3.2 Hz, 6H), 2.48 (d, *J* = 6.4 Hz, 6H). <sup>13</sup>C-NMR (100 MHz, CDCl<sub>3</sub>): δ (ppm) 155.7, 152.8, 151.7, 143.0, 141.4, 141.3, 141.1, 140.9, 139.9, 139.6, 138.8, 136.8, 129.4, 129.2, 128.6, 128.6, 128.4, 128.3, 128.1, 127.8, 20.6, 20.4, 20.3. HRMS (ESI): *m/z* [M+H]<sup>+</sup> calcd for C<sub>34</sub>H<sub>27</sub>N<sub>6</sub>O<sub>2</sub>: 551.2190; found: 551.2188.

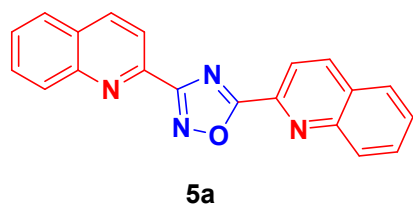

**3,5-Di(quinolin-2-yl)-1,2,4-oxadiazole (5a)**, (silica gel: 200–300 mesh, solvent system: petroleum ether/ethyl acetate = 10:1-1:1), 12 mg, 37%, white solid, m.p.: 198–200 °C. <sup>1</sup>H-NMR (400 MHz, CDCl<sub>3</sub>): δ (ppm) 8.53 (d, *J* = 8.4 Hz, 1H), 8.45–8.32 (m, 5H), 7.92 (ddd, *J* = 9.8, 8.0, 1.2 Hz, 2H), 7.88–7.80 (m, 2H), 7.72–7.63 (m, 2H). <sup>13</sup>C-NMR (100 MHz, CDCl<sub>3</sub>): δ (ppm) 175.4, 169.3, 148.1, 148.0, 146.1, 143.2, 137.7, 137.4, 130.8, 130.5, 130.4, 130.2, 129.1, 128.9, 128.8, 128.0, 127.7, 127.6, 120.8, 120.3. HRMS (ESI): *m/z* [M+H]<sup>+</sup> calcd for C<sub>20</sub>H<sub>13</sub>N<sub>4</sub>O: 325.1084; found: 325.1080.

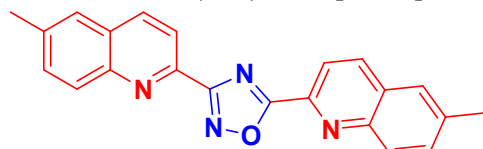

**5b**

**3,5-Bis(6-methylquinolin-2-yl)-1,2,4-oxadiazole (5b)**, (silica gel: 200–300 mesh, solvent system: petroleum ether/ethyl acetate = 10:1-1:1), 11 mg, 31%, white solid, m.p.: 224–226 °C. <sup>1</sup>H-NMR (400 MHz, CDCl<sub>3</sub>): δ (ppm) 8.48 (d, *J* = 8.4 Hz, 1H), 8.35–8.23 (m, 5H), 7.69–7.60 (m, 4H), 2.58 (d, *J* = 6.0 Hz, 6H). <sup>13</sup>C-NMR (100 MHz, CDCl<sub>3</sub>): δ (ppm) 175.4, 169.3, 146.8, 146.7, 145.2, 142.3, 139.3, 138.2, 136.8, 136.5, 133.1, 132.6, 130.1, 130.1, 129.2, 128.9, 126.5, 126.4, 120.8, 120.3, 21.8, 21.7. HRMS (ESI): *m/z* [M+H]<sup>+</sup> calcd for C<sub>22</sub>H<sub>17</sub>N<sub>4</sub>O: 353.1397; found: 353.1393.

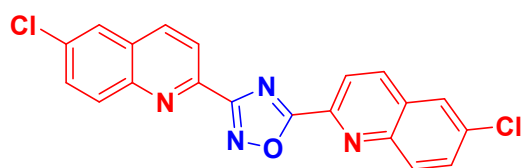

**5c**

**3,5-Bis(6-chloroquinolin-2-yl)-1,2,4-oxadiazole (5c)**, (silica gel: 200–300 mesh, solvent system: petroleum ether/ethyl acetate = 10:1-1:1), 16 mg, 41%, white solid, m.p.: 220–221 °C. <sup>1</sup>H-NMR (400 MHz, CDCl<sub>3</sub>): δ (ppm) 8.54 (d, *J* = 8.4 Hz, 1H), 8.41 (d, *J* = 8.4 Hz, 1H), 8.34–8.29 (m, 3H), 7.92 (dd, *J* = 10.6, 2.2 Hz, 2H), 7.77 (ddd, *J* = 17.2, 9.0, 2.4 Hz, 3H). <sup>13</sup>C-NMR (100 MHz, CDCl<sub>3</sub>): δ (ppm) 175.2, 169.1, 146.5, 146.4, 146.2, 143.2, 136.8, 136.5, 135.1, 134.1, 132.1, 132.0, 131.9, 131.4, 129.7, 129.4, 126.4, 126.3, 121.6, 121.2. HRMS (ESI): *m/z* [M+H]<sup>+</sup> calcd for C<sub>20</sub>H<sub>11</sub>Cl<sub>2</sub>N<sub>4</sub>O: 393.0304; found: 393.0300.

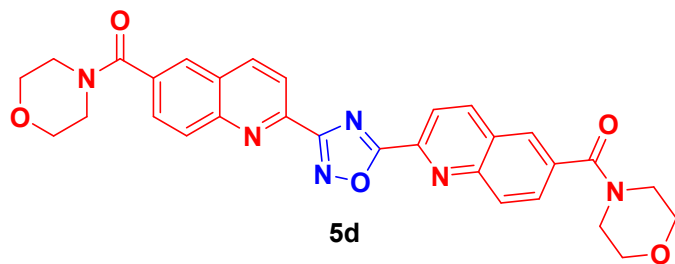

**5d**

**((1,2,4-Oxadiazole-3,5-diyl)bis(quinoline-2,6-diyl))bis(morpholinomethanone) (5d)**, (silica gel: 200–300 mesh, solvent system: petroleum ether/ethyl acetate = 10:1-



1:1), 19 mg, 35%, white solid, m.p.: 111-113 °C. <sup>1</sup>H-NMR (400 MHz, CDCl<sub>3</sub>): δ (ppm) 8.58 (d, *J* = 8.4 Hz, 1H), 8.52–8.36 (m, 5H), 8.01 (dd, *J* = 8.4, 2.0 Hz, 2H), 7.83 (ddd, *J* = 15.6, 8.6, 1.8 Hz, 2H), 3.95–3.53 (m, 16H). <sup>13</sup>C-NMR (100 MHz, CDCl<sub>3</sub>): δ (ppm) 175.2, 169.3, 169.1, 169.0, 148.2, 148.1, 147.2, 144.1, 138.2, 137.9, 135.7, 134.8, 131.1, 131.0, 129.1, 128.7, 128.3, 126.8, 121.5, 121.1, 66.8. HRMS (ESI): *m/z* [M+H]<sup>+</sup> calcd for C<sub>30</sub>H<sub>27</sub>N<sub>6</sub>O<sub>5</sub>: 551.2037; found: 551.2035.

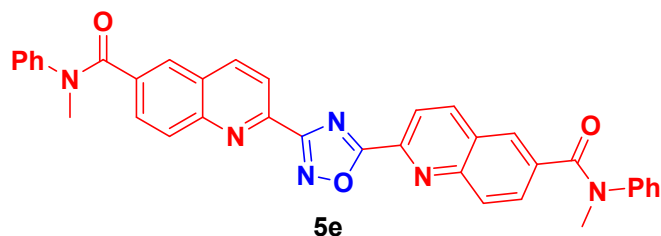

**2,2'-(1,2,4-Oxadiazole-3,5-diyl)bis(N-methyl-N-phenylquinoline-6-carboxamide) (5e)**, (silica gel: 200–300 mesh, solvent system: petroleum ether/ethyl acetate = 10:1-1:1), 19 mg, 32%, white solid, m.p.: 266-267 °C. <sup>1</sup>H-NMR (400 MHz, CDCl<sub>3</sub>): δ (ppm) 8.43 (d, *J* = 8.4 Hz, 1H), 8.33–8.18 (m, 3H), 8.07 (dd, *J* = 8.8, 3.6 Hz, 2H), 7.95 (dd, *J* = 7.0, 1.8 Hz, 2H), 7.64–7.57 (m, 2H), 7.25–7.17 (m, 5H), 7.16–6.99 (m, 9H), 3.57 (s, 6H). <sup>13</sup>C-NMR (100 MHz, CDCl<sub>3</sub>): δ (ppm) 175.1, 169.5, 169.2, 169.0, 147.9, 147.8, 147.0, 144.2, 144.1, 143.9, 138.3, 138.0, 136.4, 135.5, 130.3, 130.2, 129.8, 129.7, 129.6, 129.4, 129.3, 128.7, 128.2, 127.8, 127.0, 126.9, 126.8, 121.2, 120.7, 38.6, 38.4. HRMS (ESI): *m/z* [M+H]<sup>+</sup> calcd for C<sub>36</sub>H<sub>27</sub>N<sub>6</sub>O<sub>3</sub>: 591.2139; found: 591.2138.

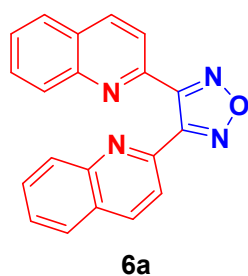

**3,4-Di(quinolin-2-yl)-1,2,5-oxadiazole (6a)**, (silica gel: 200–300 mesh, solvent system: petroleum ether/ethyl acetate = 10:1-1:1), 61 mg, 95%, white solid, m.p.: 160-162 °C. <sup>1</sup>H-NMR (400 MHz, CDCl<sub>3</sub>): δ (ppm) 8.30 (d, *J* = 8.4 Hz, 2H), 8.05 (d, *J* = 8.4 Hz, 2H), 7.89 (dd, *J* = 8.4, 1.6 Hz, 2H), 7.85 (d, *J* = 8.0 Hz, 2H), 7.68 (ddd, *J* = 8.4, 6.8, 1.6 Hz, 2H), 7.60 (ddd, *J* = 8.2, 6.8, 1.2 Hz, 2H). <sup>13</sup>C-NMR (100 MHz, CDCl<sub>3</sub>): δ (ppm) 153.7, 147.6, 146.4, 136.5, 130.0, 129.8, 128.1, 127.7, 127.6, 121.8. HRMS (ESI): *m/z* [M+H]<sup>+</sup> calcd for C<sub>20</sub>H<sub>13</sub>N<sub>4</sub>O: 325.1083; found: 325.1080.

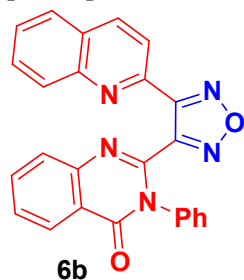

**3-Phenyl-2-(4-(quinolin-2-yl)-1,2,5-oxadiazol-3-yl)quinazolin-4(3H)-one (6b)**, (silica gel: 200–300 mesh, solvent system: petroleum ether/ethyl acetate = 10:1-1:1), 81 mg, 97%, white solid, m.p.: 188-189 °C. <sup>1</sup>H-NMR (400 MHz, CDCl<sub>3</sub>): δ (ppm) 8.53 (dd, *J* = 7.8, 1.4 Hz, 1H), 8.25 (d, *J* = 8.4 Hz, 1H), 7.99 (d, *J* = 8.4 Hz, 1H), 7.88–7.80 (m, 3H), 7.70–7.53 (m, 4H), 7.23–7.17 (m, 1H), 7.15–7.09 (m, 4H). <sup>13</sup>C-NMR (100 MHz, CDCl<sub>3</sub>): δ (ppm) 161.5, 152.9, 149.3, 147.2, 144.6, 144.5, 137.5, 135.6, 134.9, 130.7, 129.6, 129.3, 128.9, 128.8, 128.3, 128.1, 127.7, 127.4, 121.8, 119.6. HRMS (ESI): *m/z* [M+H]<sup>+</sup> calcd for C<sub>25</sub>H<sub>16</sub>N<sub>5</sub>O<sub>2</sub>: 418.1298; found: 418.1294.

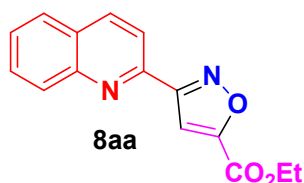

**Ethyl 3-(quinolin-2-yl)isoxazole-5-carboxylate (8aa)**, (silica gel: 200–300 mesh, solvent system: petroleum ether/ethyl acetate = 10:1-1:1), 47 mg, 88%, white solid, m.p.: 89-91 °C. <sup>1</sup>H-NMR (400 MHz, CDCl<sub>3</sub>): δ (ppm) 8.26 (dd, *J* = 8.8, 0.8 Hz, 1H), 8.20 (d, *J* = 8.4 Hz, 1H), 8.14 (dd, *J* = 8.6, 1.0 Hz, 1H), 7.86 (dd, *J* = 8.2, 1.4 Hz, 1H), 7.80–7.72 (m, 2H), 7.59 (ddd, *J* = 8.2, 7.0, 1.2 Hz, 1H), 4.48 (q, *J* = 7.2 Hz, 2H), 1.45 (t, *J* = 7.2 Hz, 3H). <sup>13</sup>C-NMR (100 MHz, CDCl<sub>3</sub>): δ (ppm) 164.1, 160.9, 156.8, 147.9, 147.4, 137.1, 130.1, 129.8, 128.4, 127.7, 127.5, 118.8, 108.5, 62.3, 14.1. HRMS (ESI): *m/z* [M+H]<sup>+</sup> calcd for C<sub>15</sub>H<sub>13</sub>N<sub>2</sub>O<sub>3</sub>: 269.0920; found: 269.0922.

## 6. References

1. Zhao, J.-Q.; Zhou, M.-Q.; Zuo, J.; Xu, X.-Y.; Zhang, X.-M.; Yuan, W.-C. Synthesis of furoxan derivatives: DABCO-mediated cascade sulfonylation/cyclization reaction of α-nitro-ketoximes. *Tetrahedron* **2015**, *71*, 1560-1565.
2. Kaplaneris, N.; Kaltenhäuser, F.; Sirvinskaite, G.; Fan, S.; De Oliveira, T.; Conradi, L.-C.; Ackermann, L. Late-stage stitching enabled by manganese-catalyzed C–H activation: Peptide ligation and access to cyclopeptides. *Sci. Adv.* **2021**, *7*, eabe6202.

## 7. Copy of 1H and 13C NMR Spectra of Products

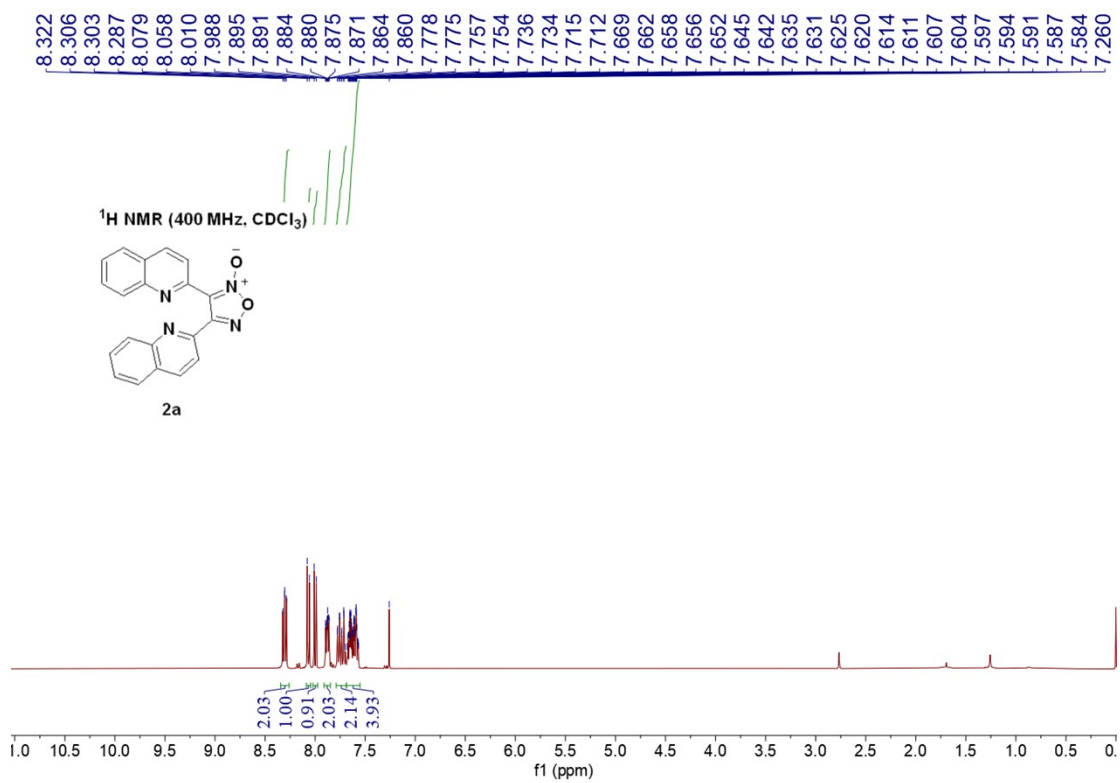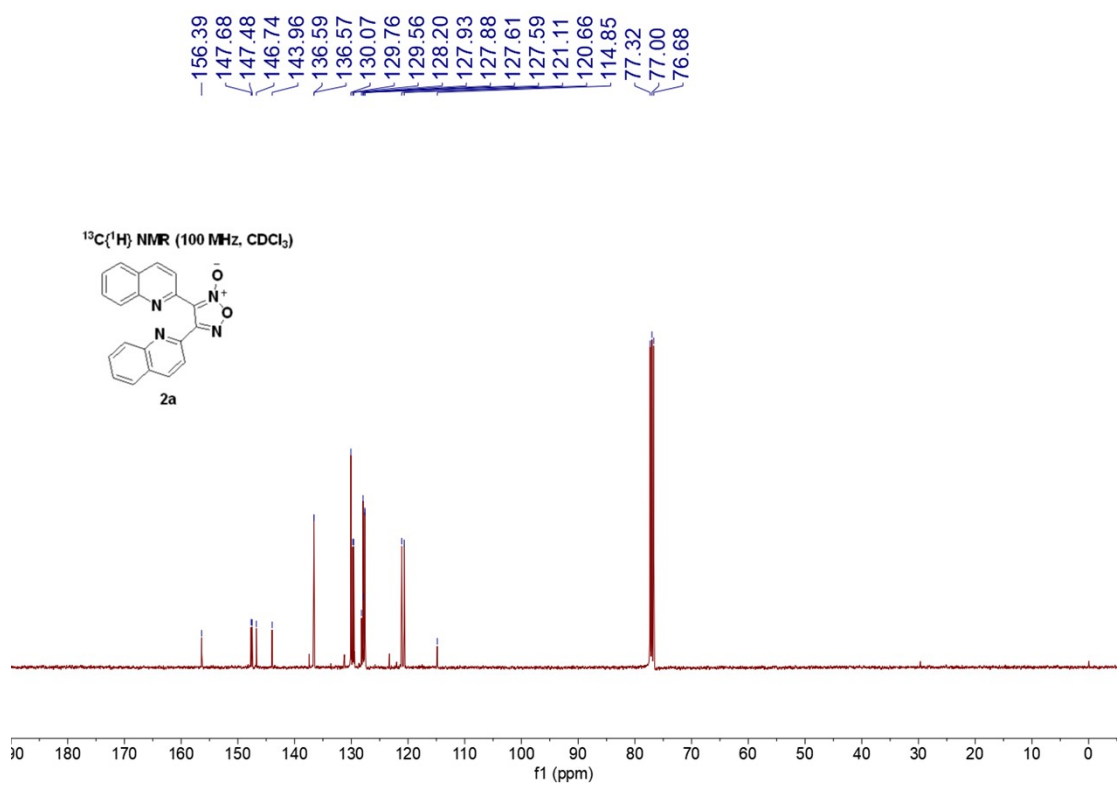

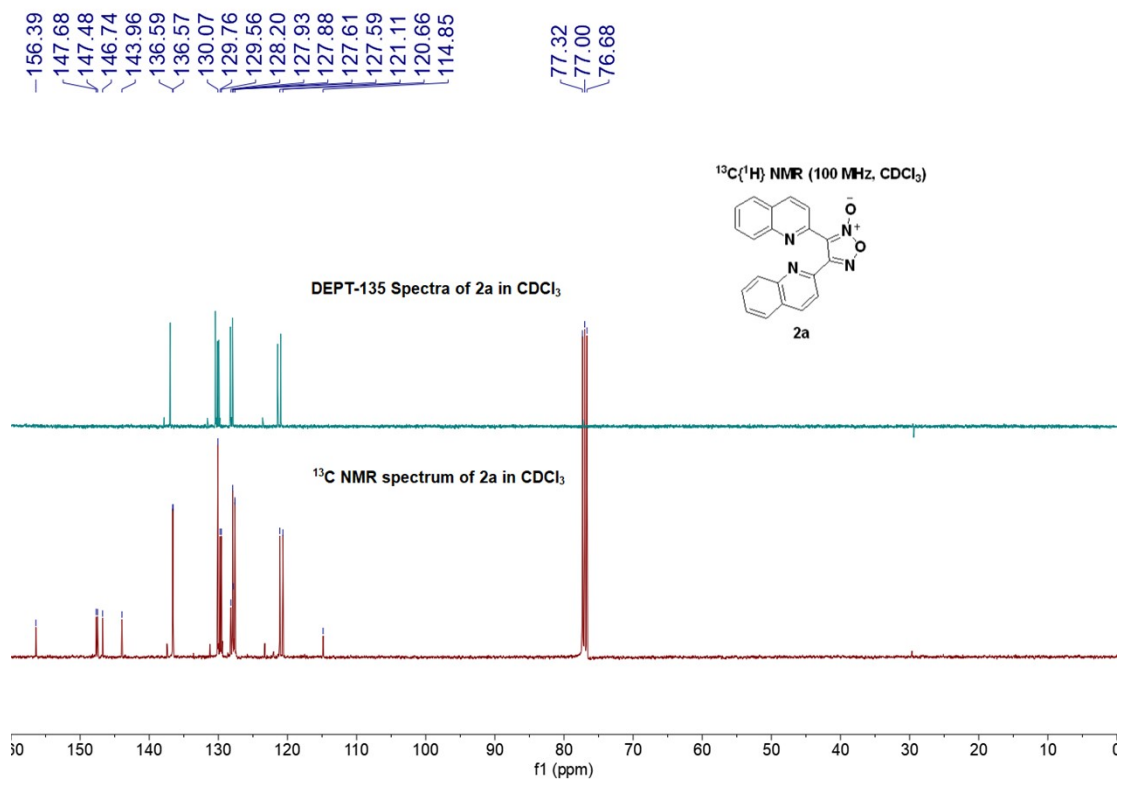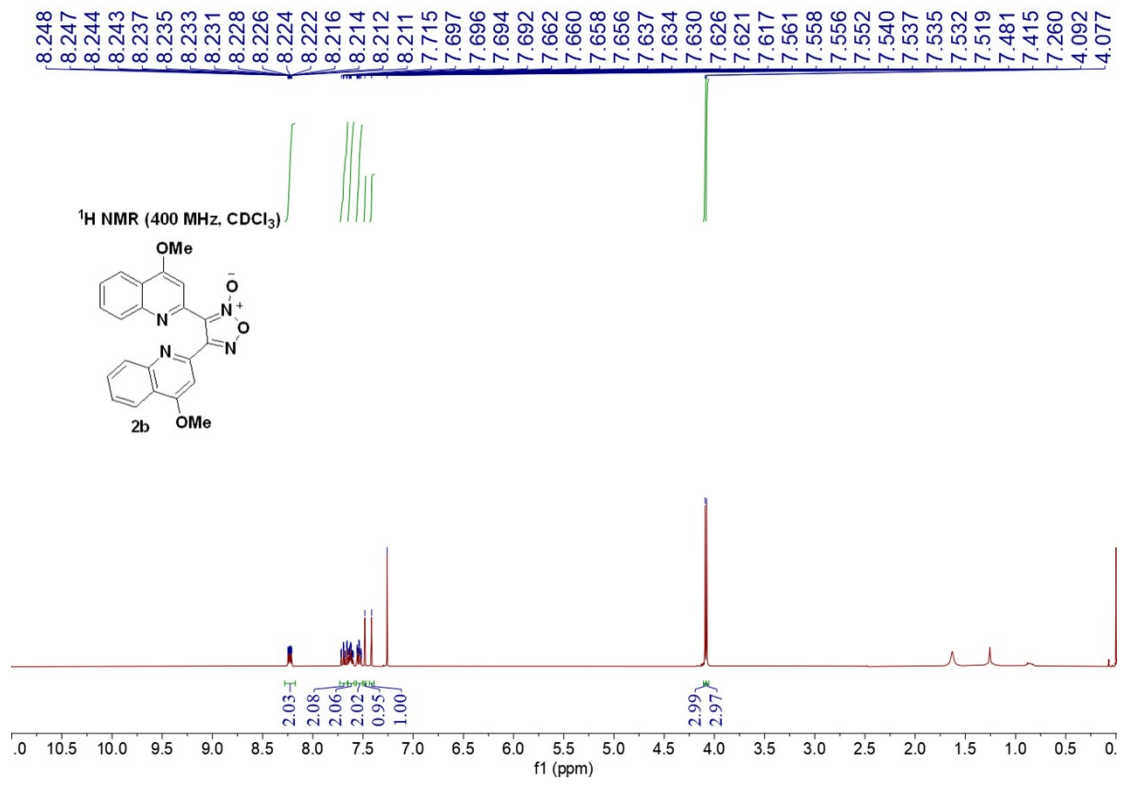

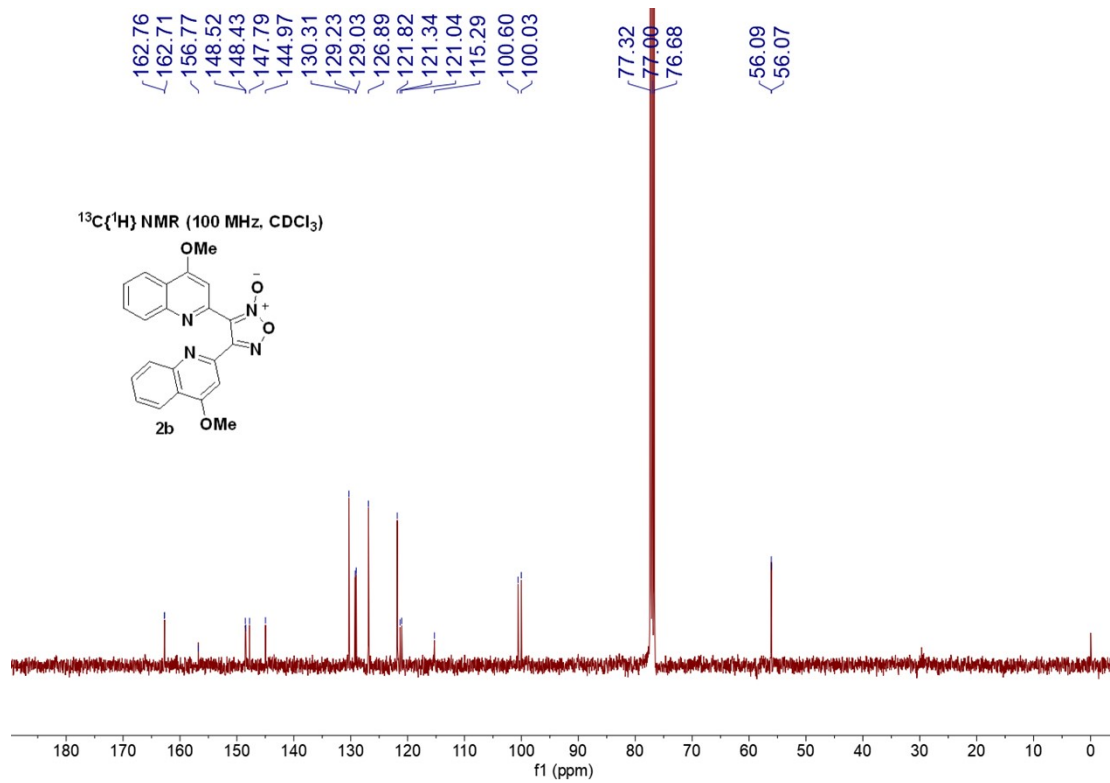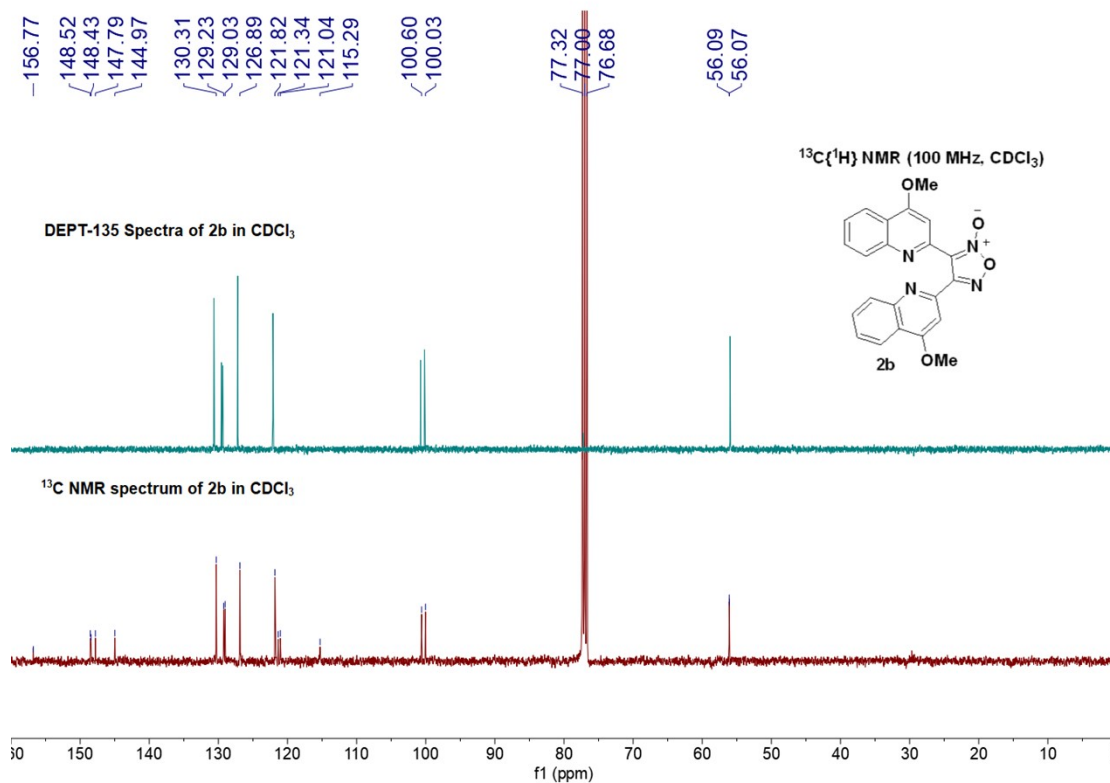

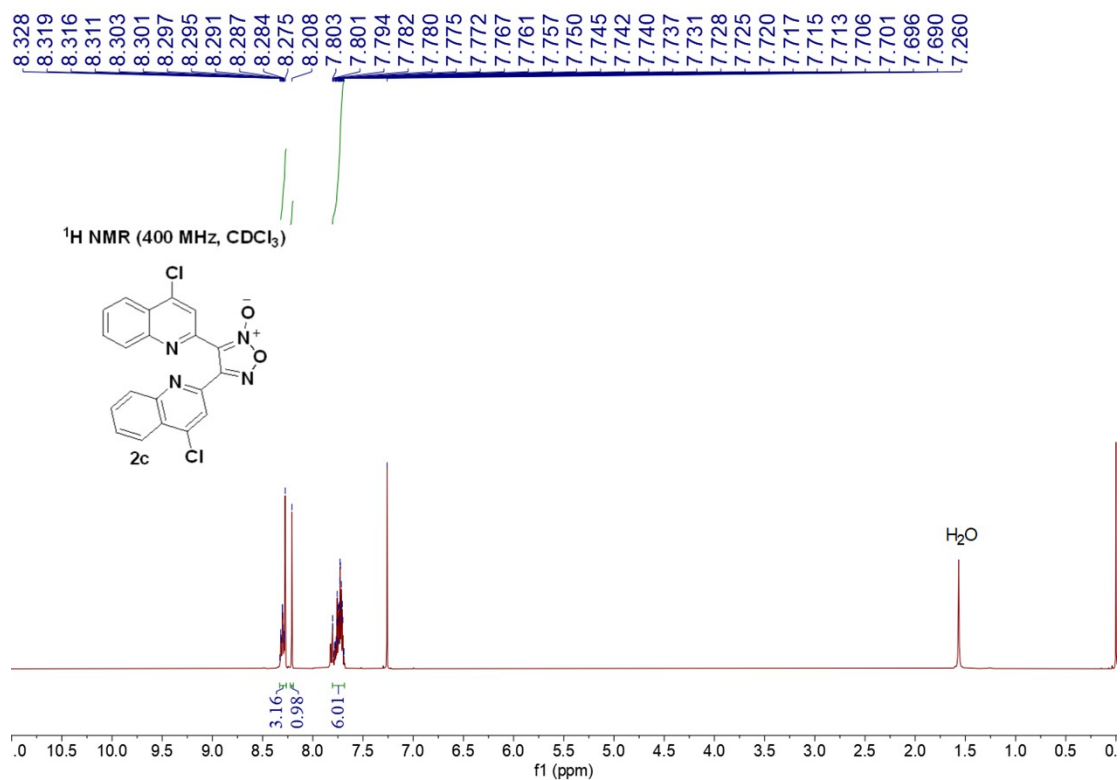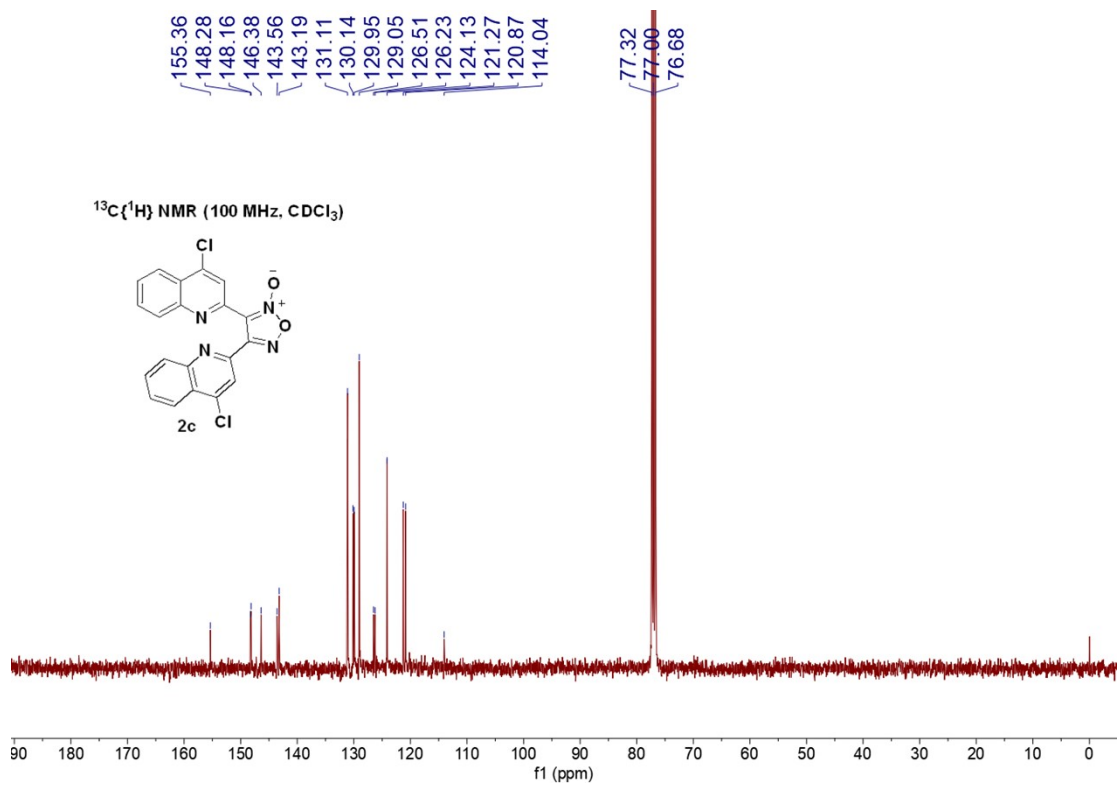

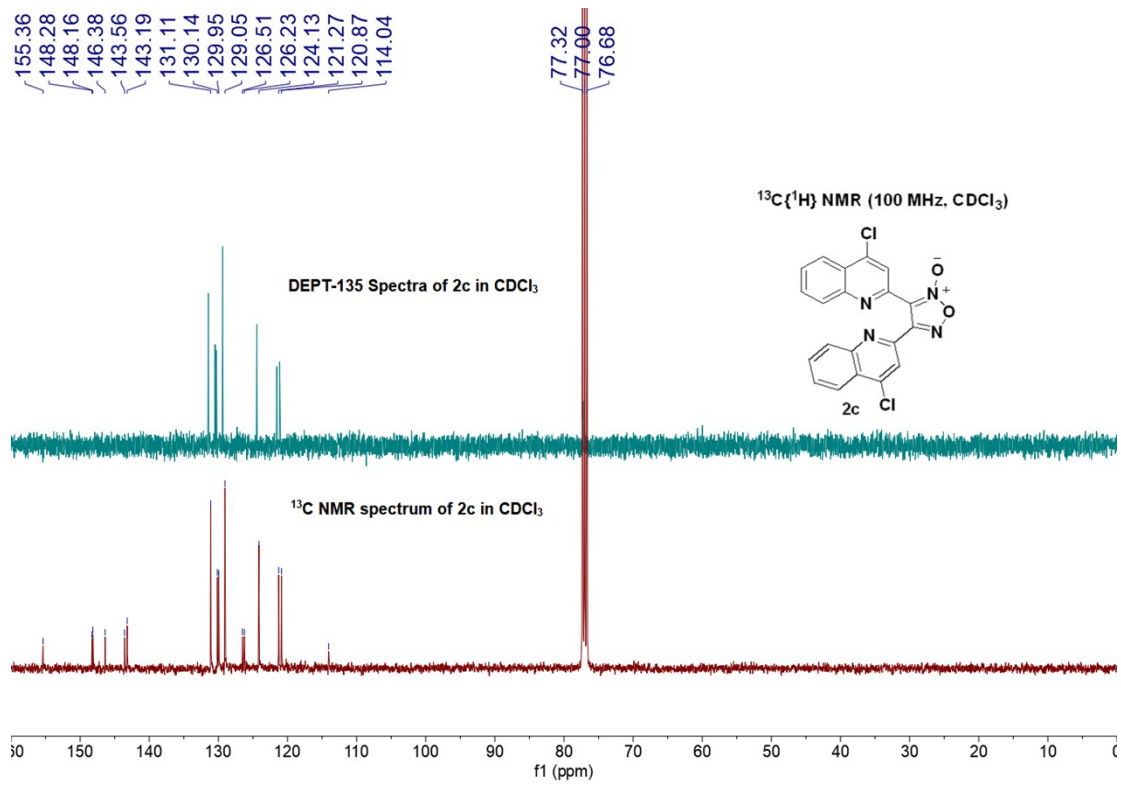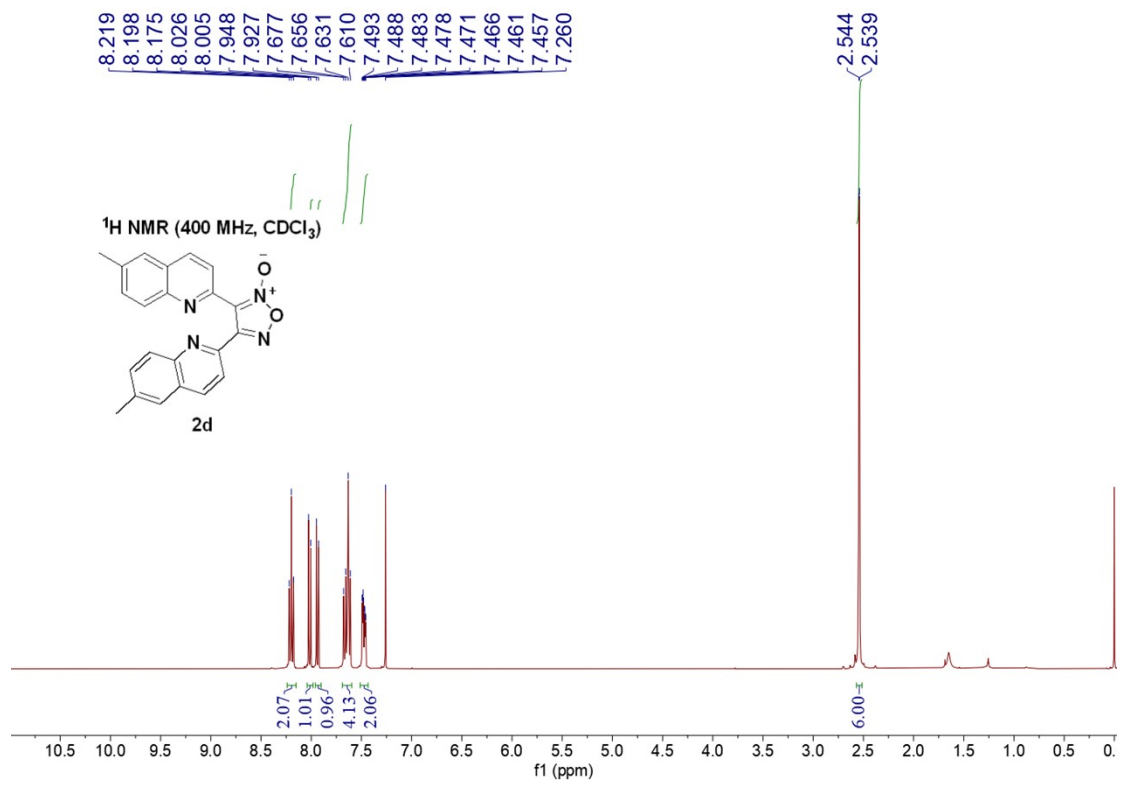

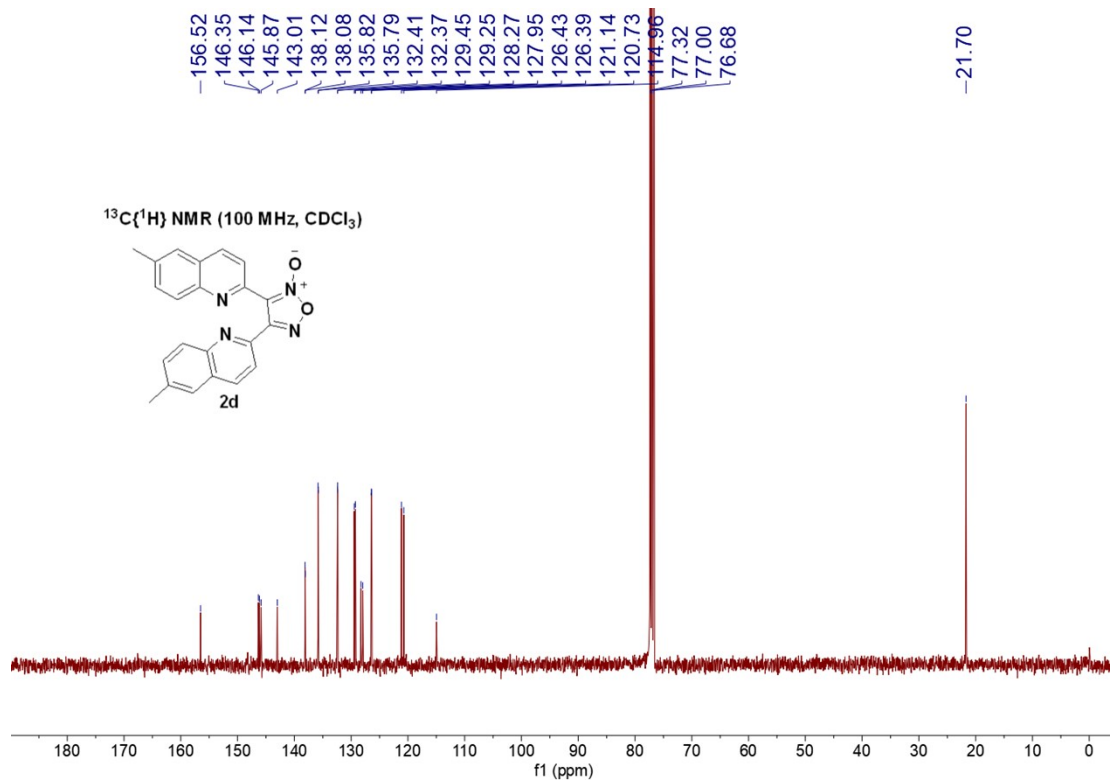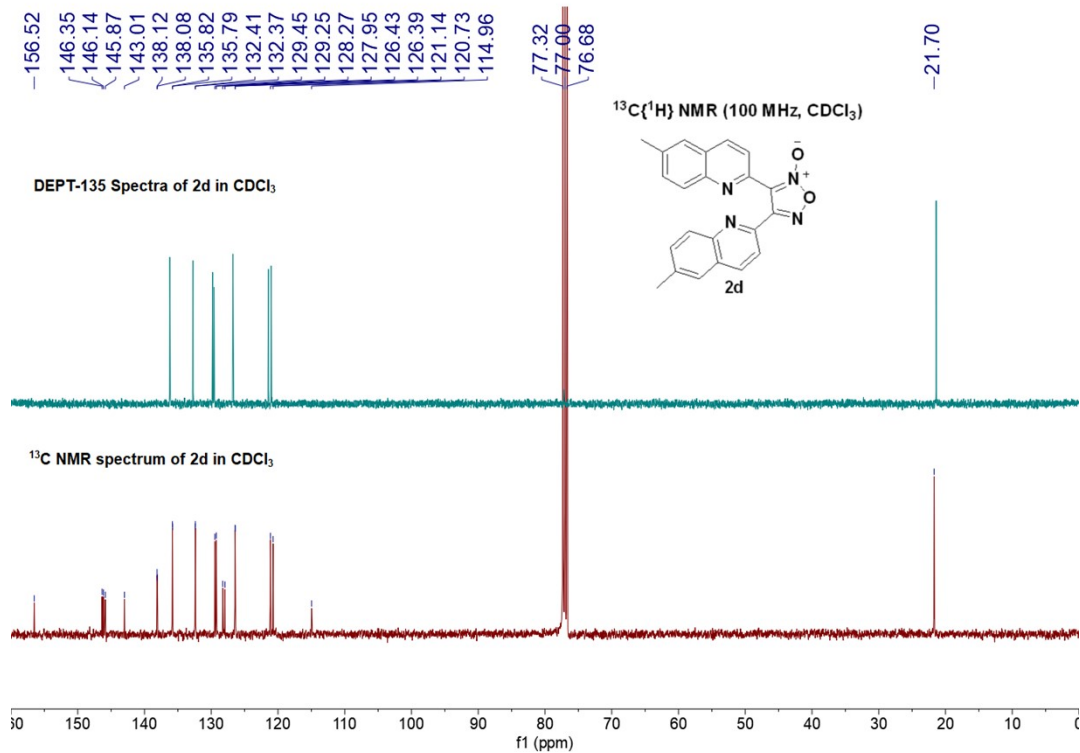



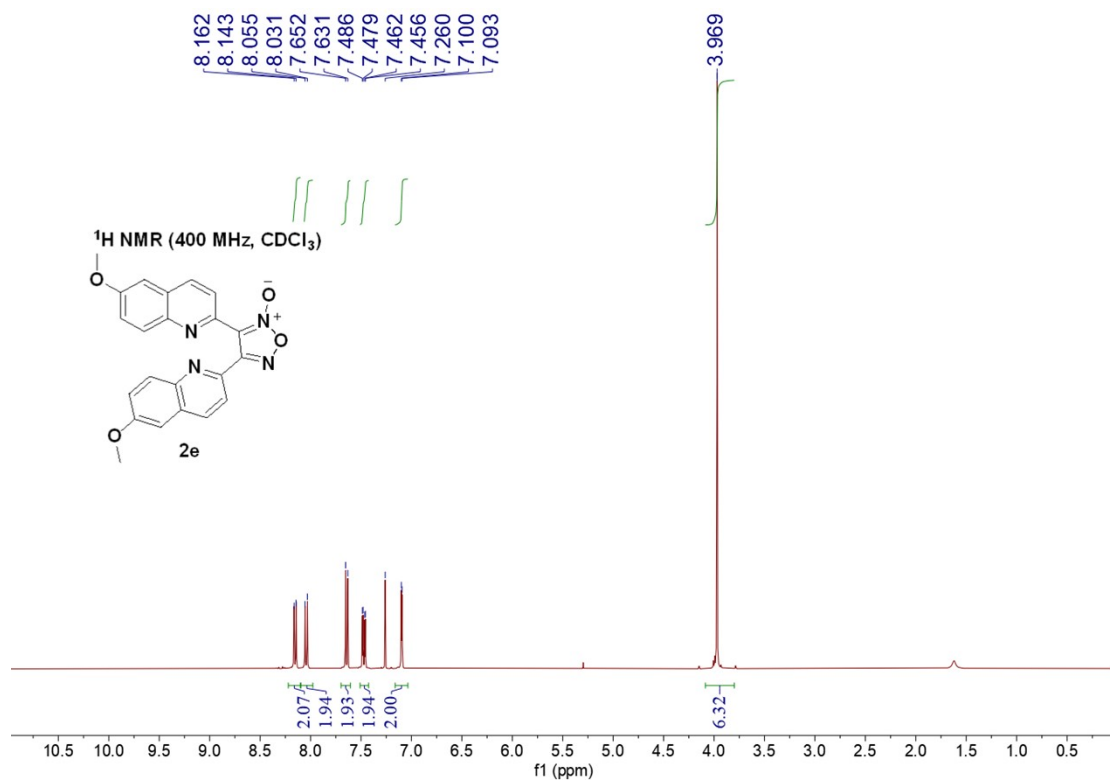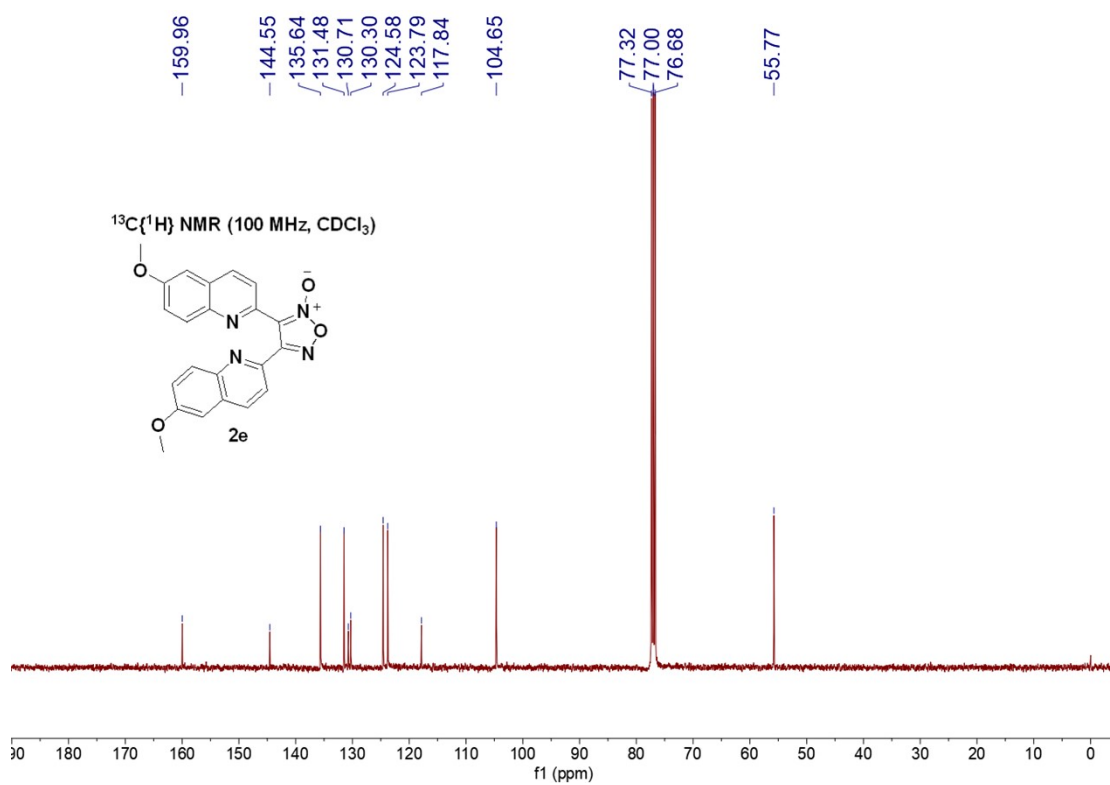

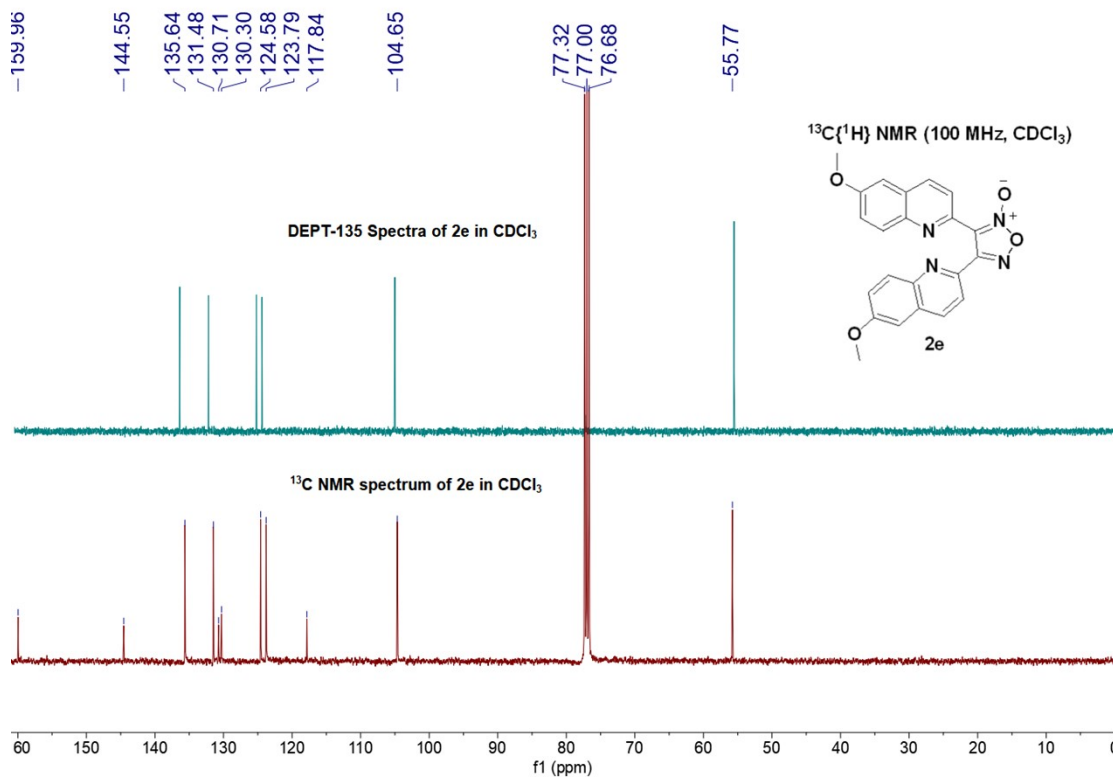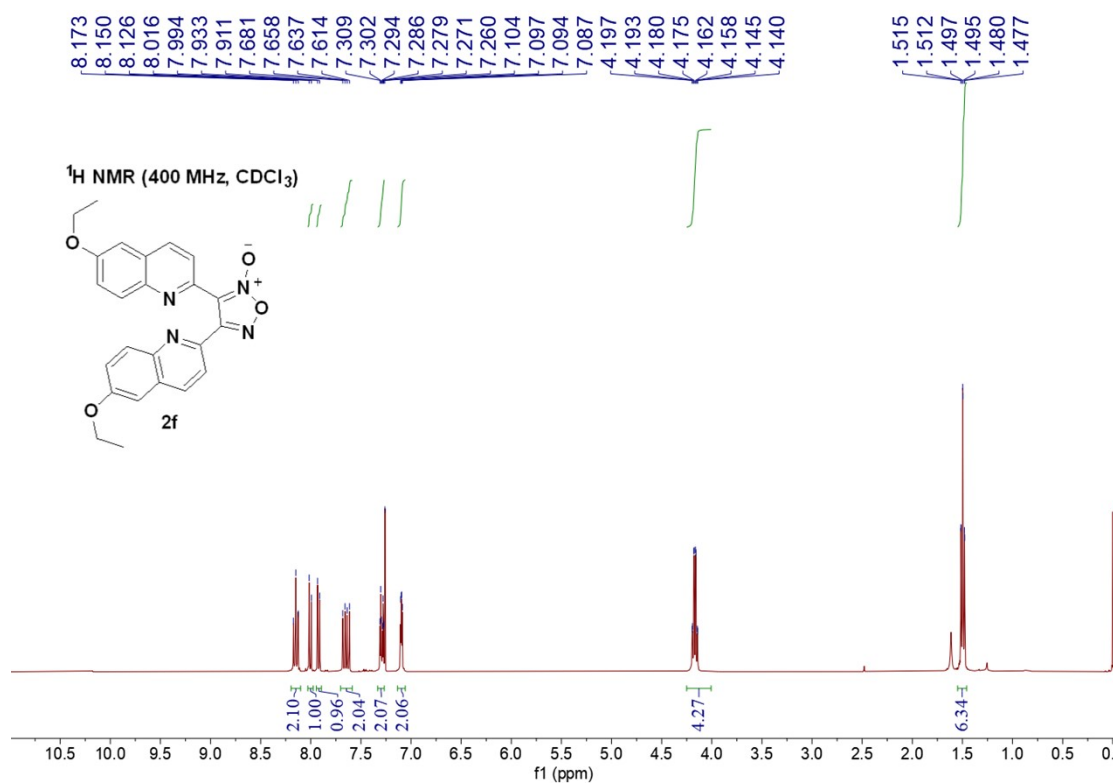

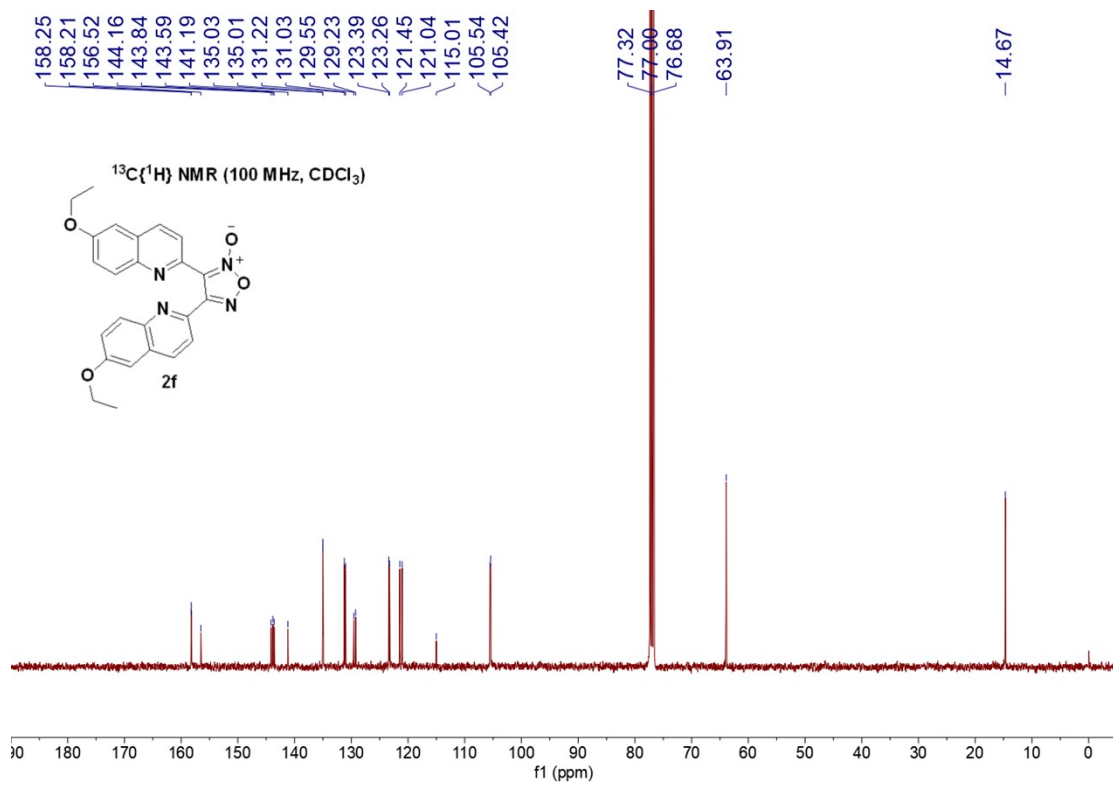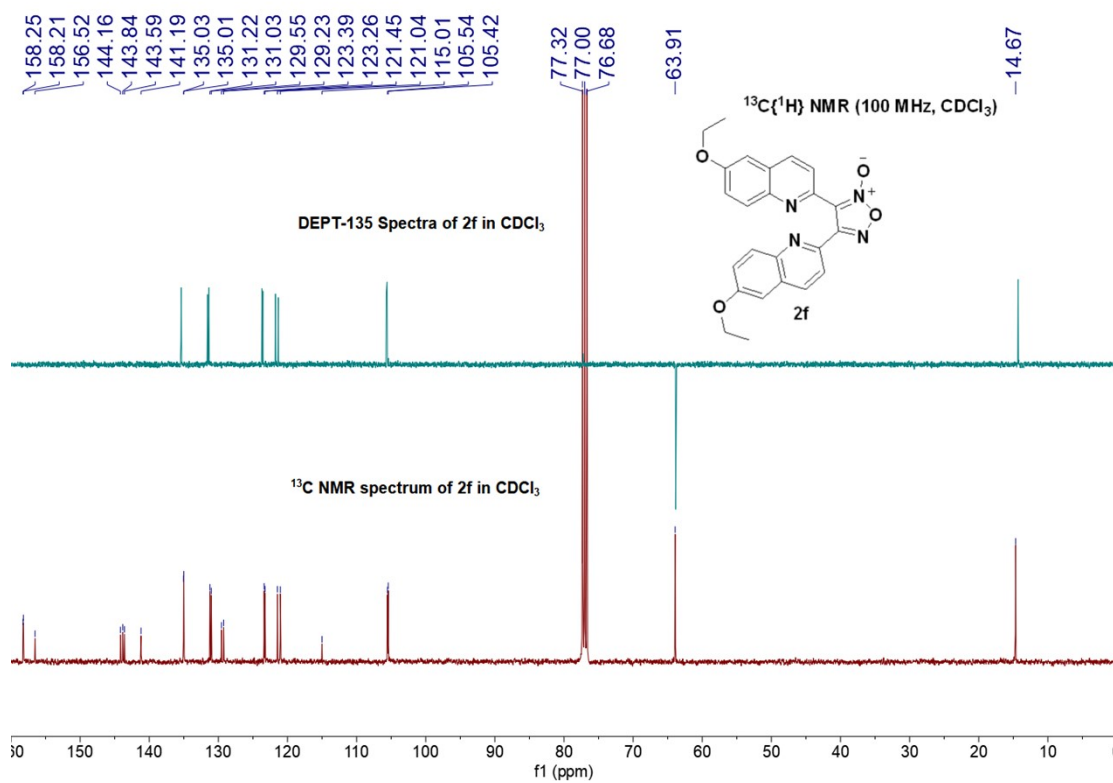

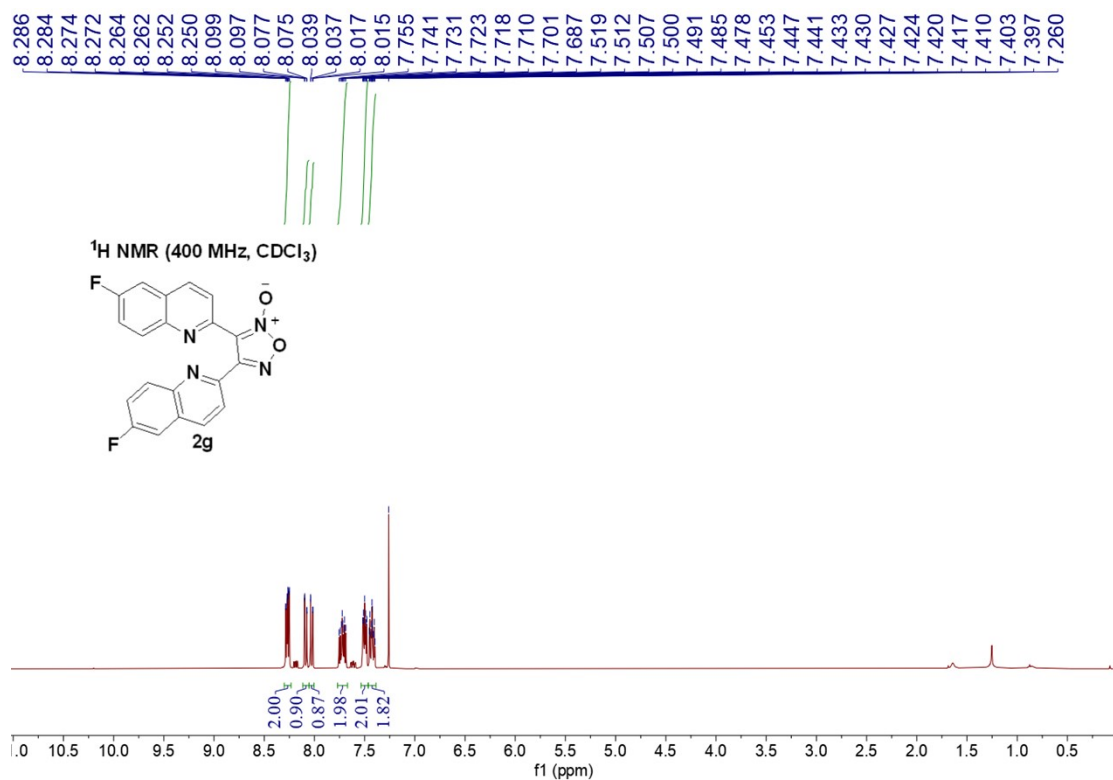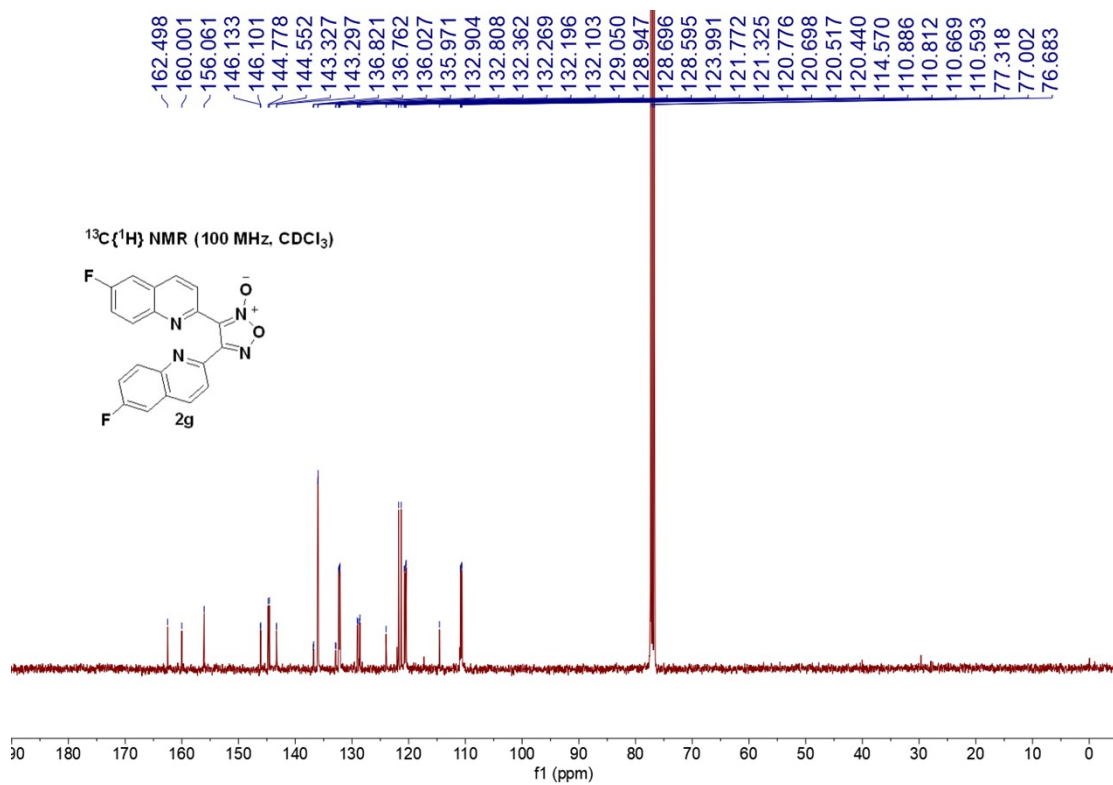

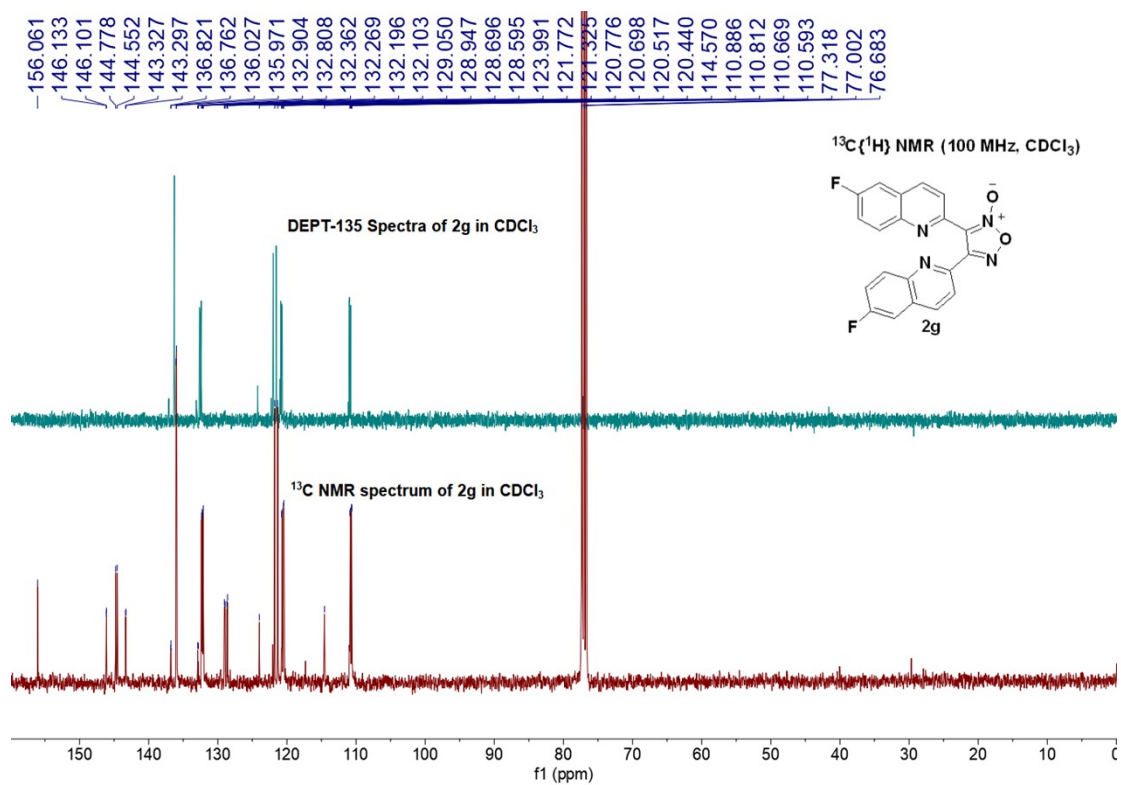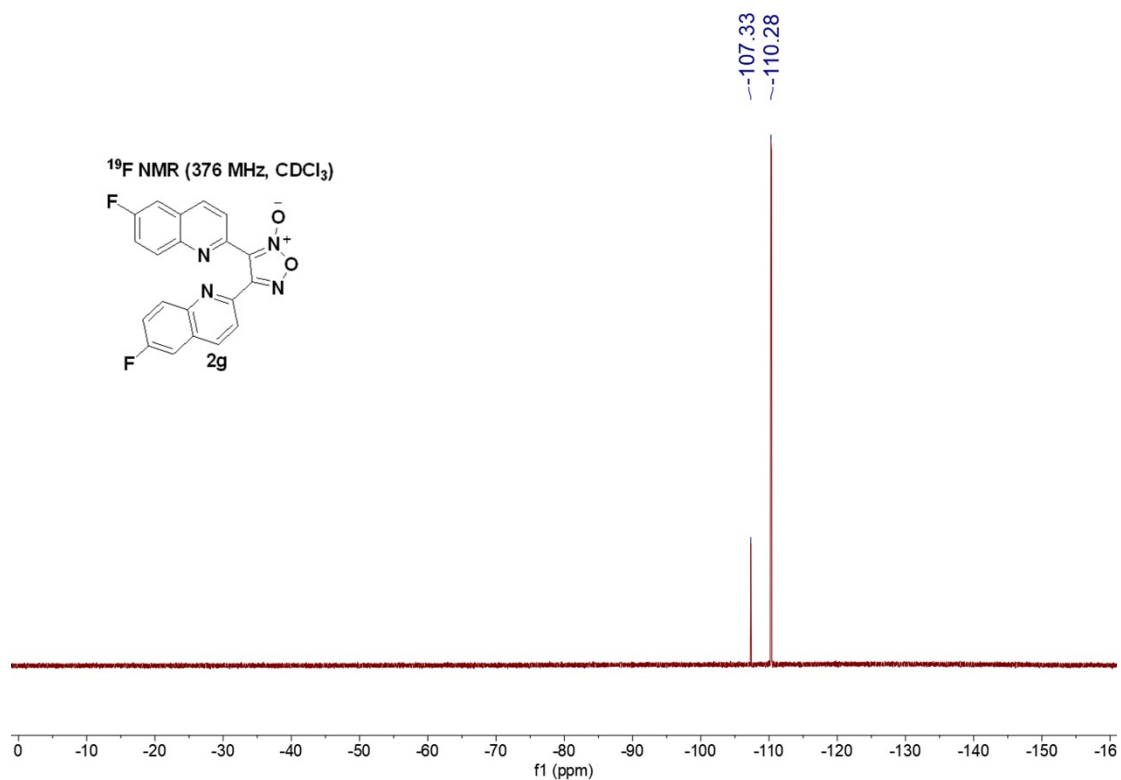

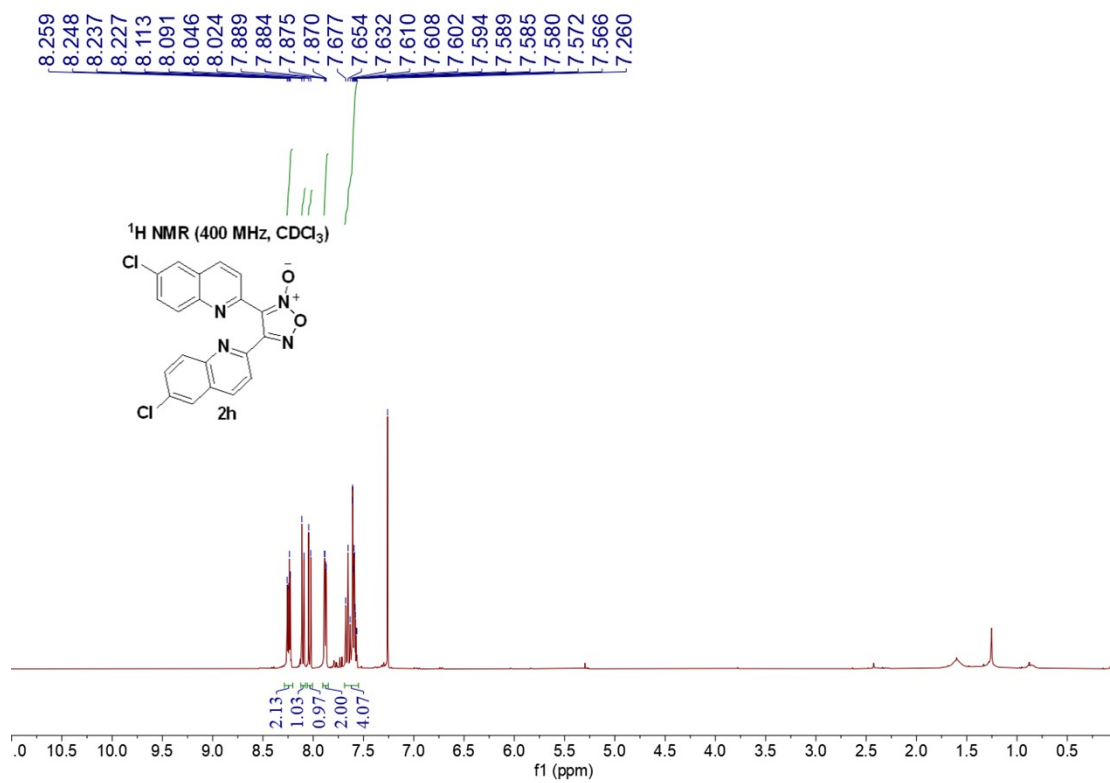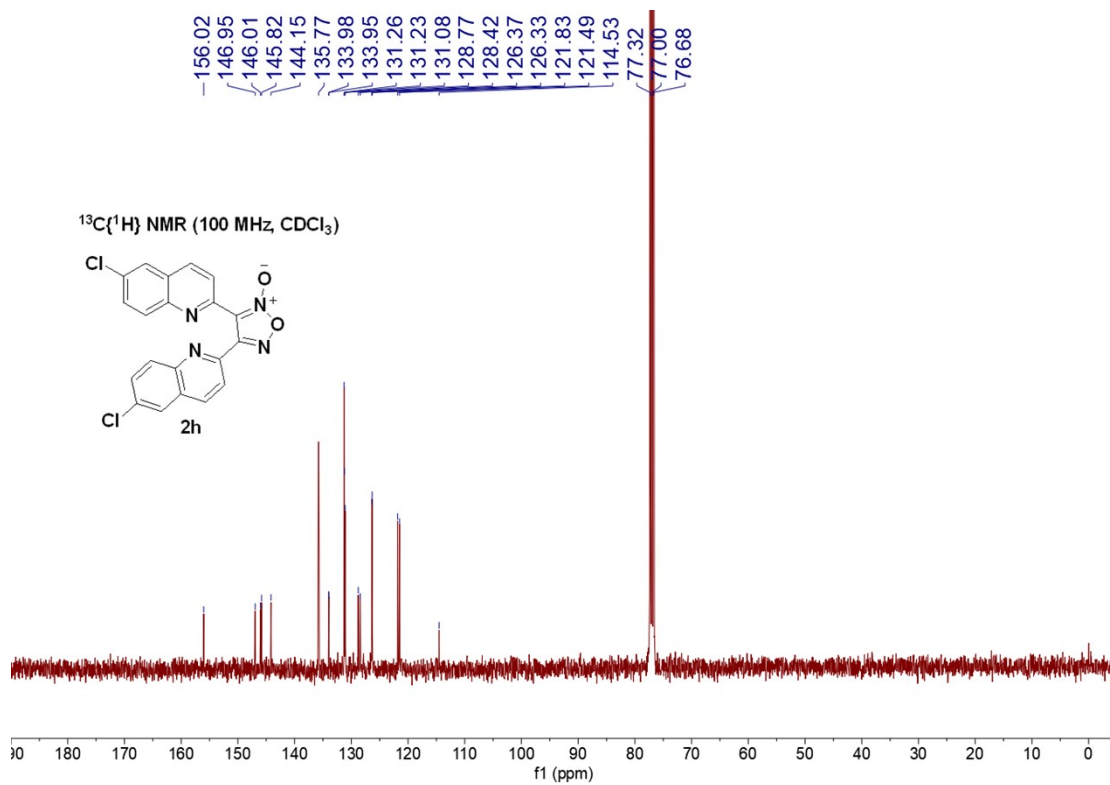

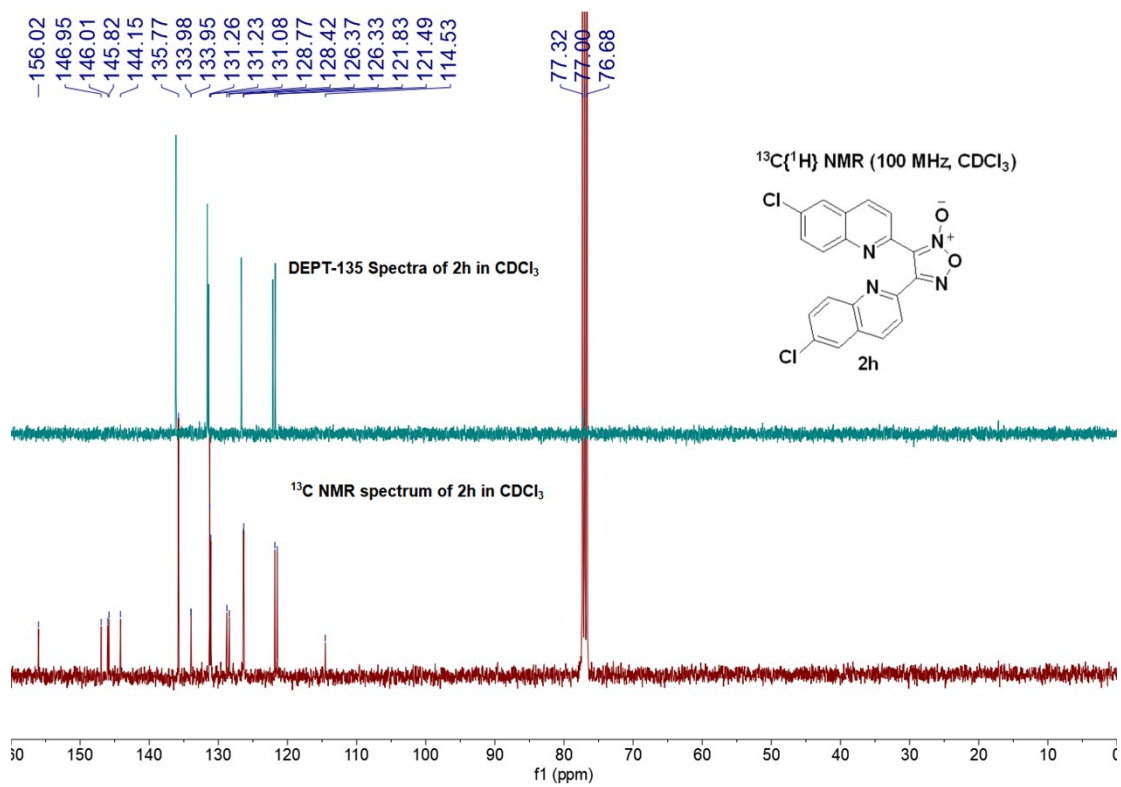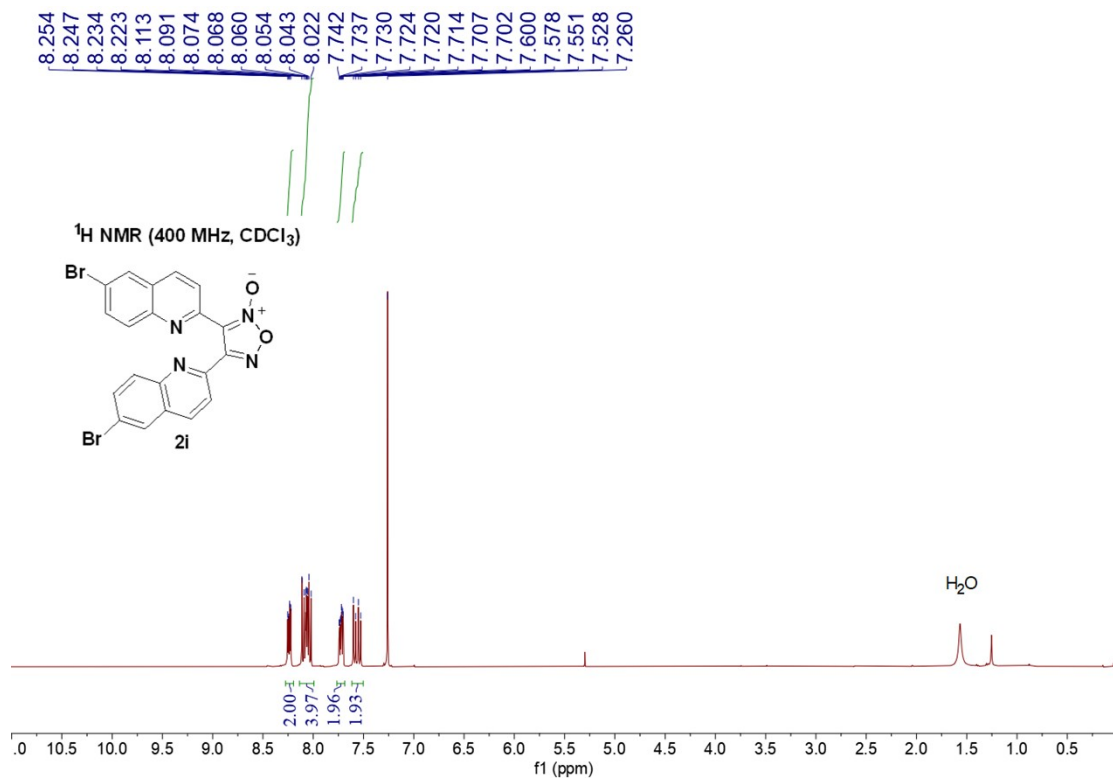



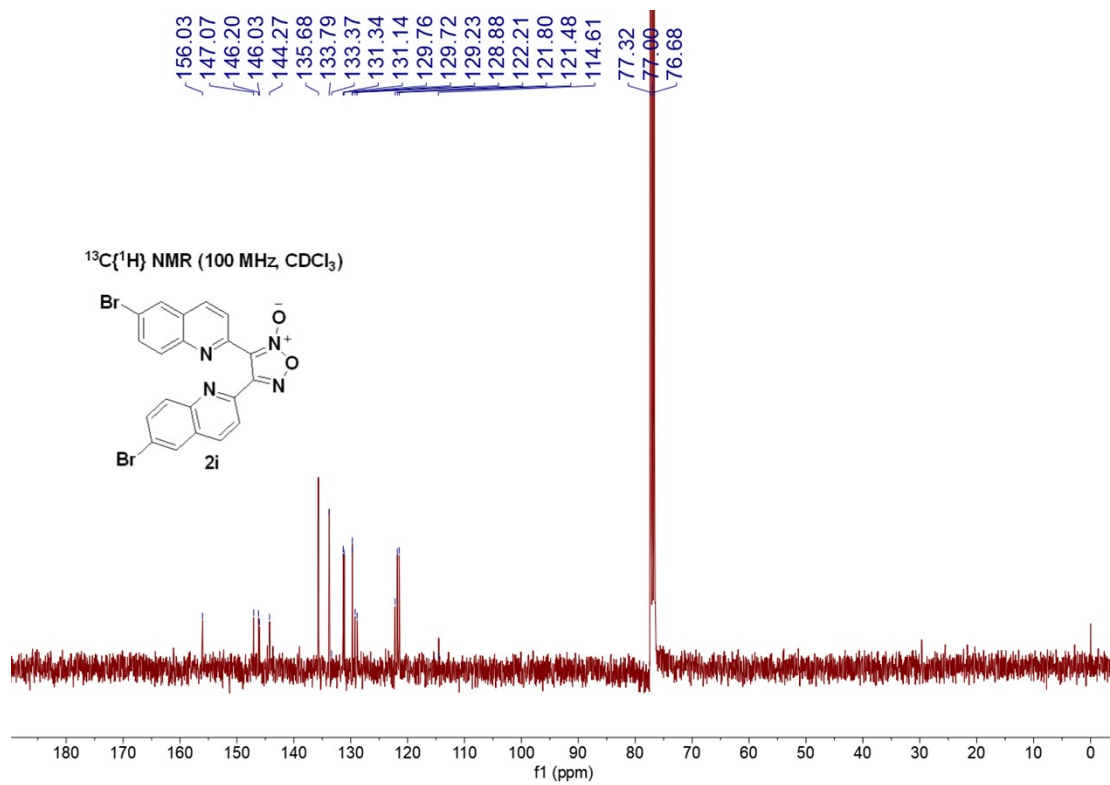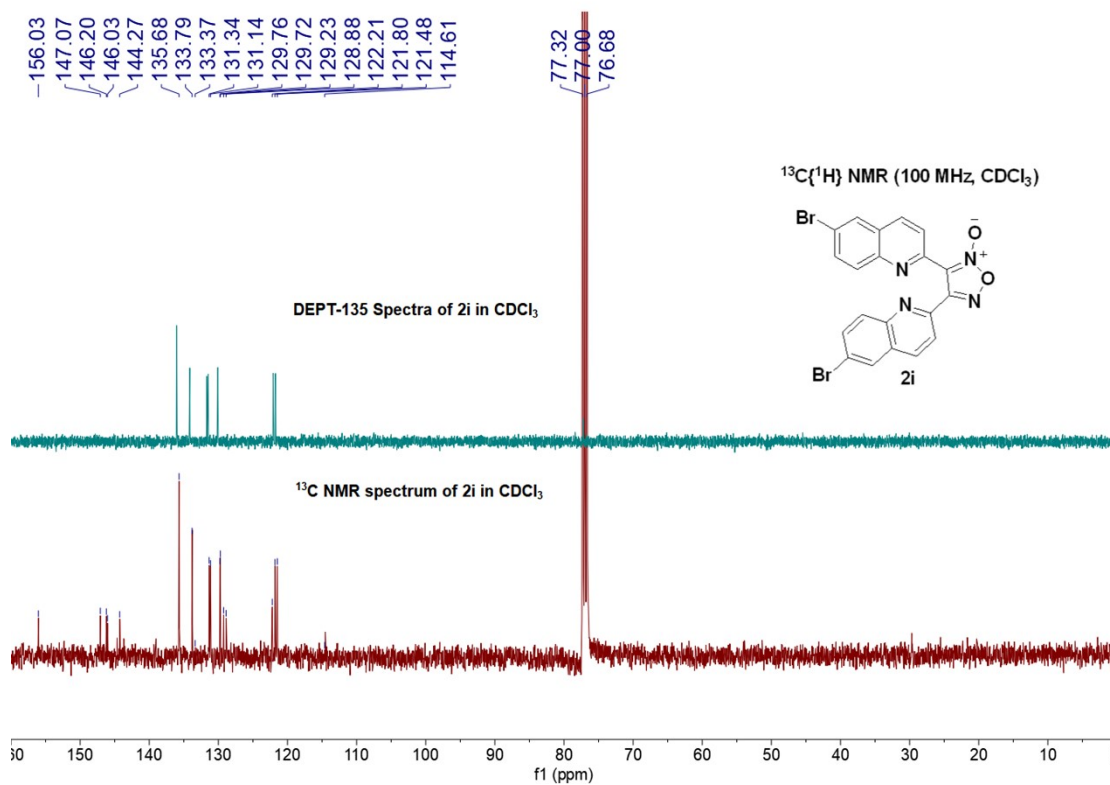



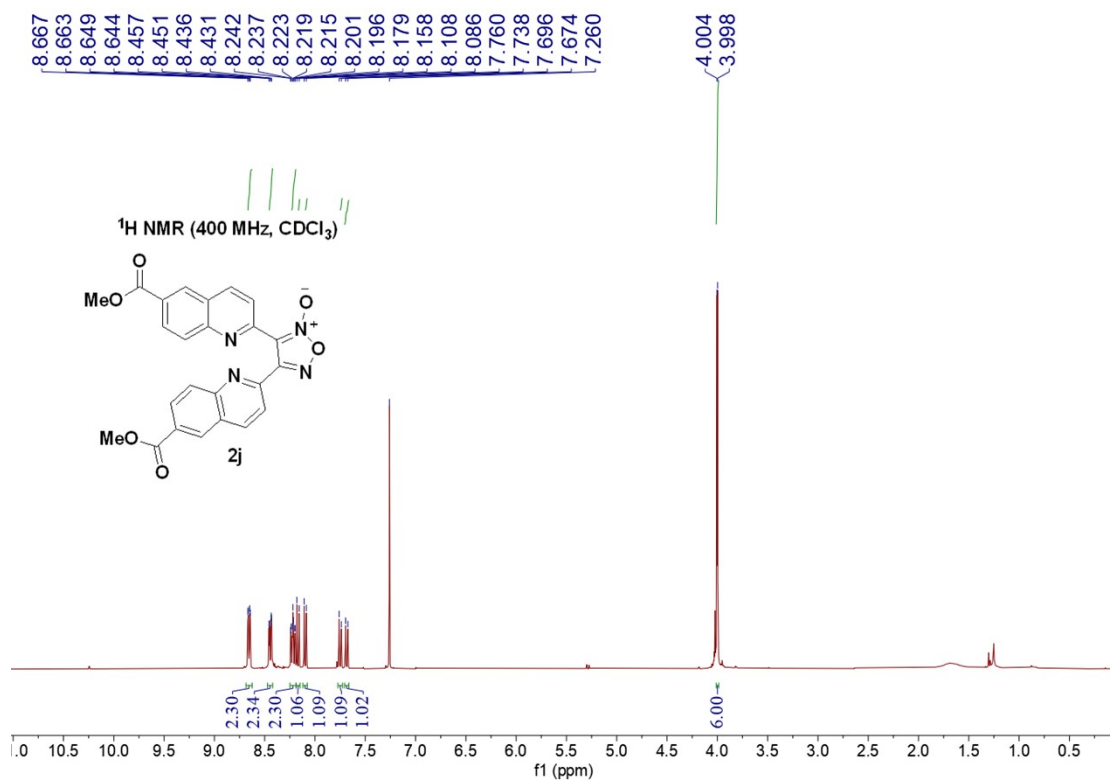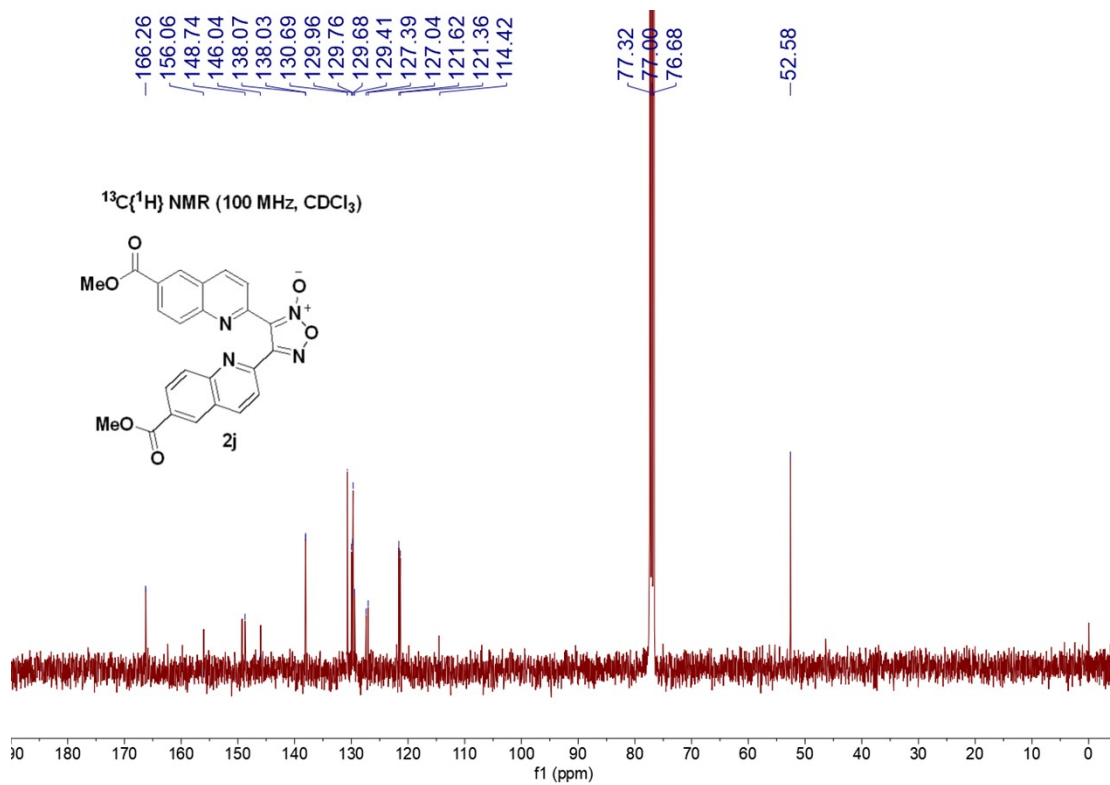



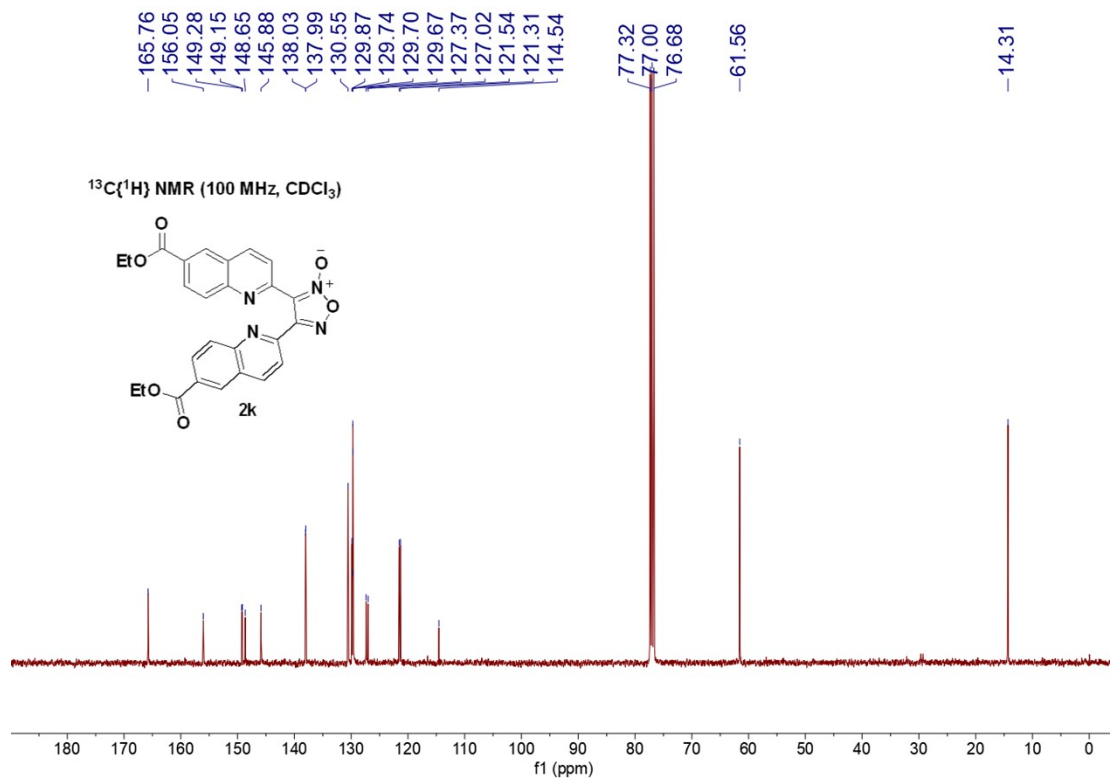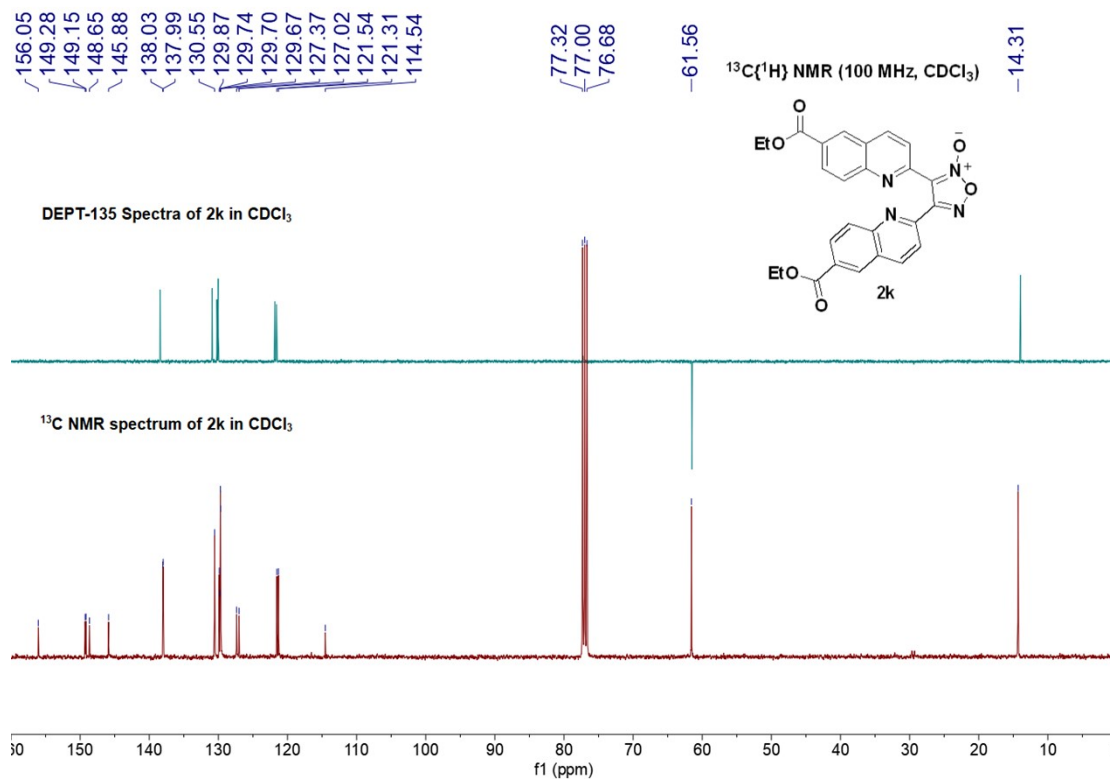

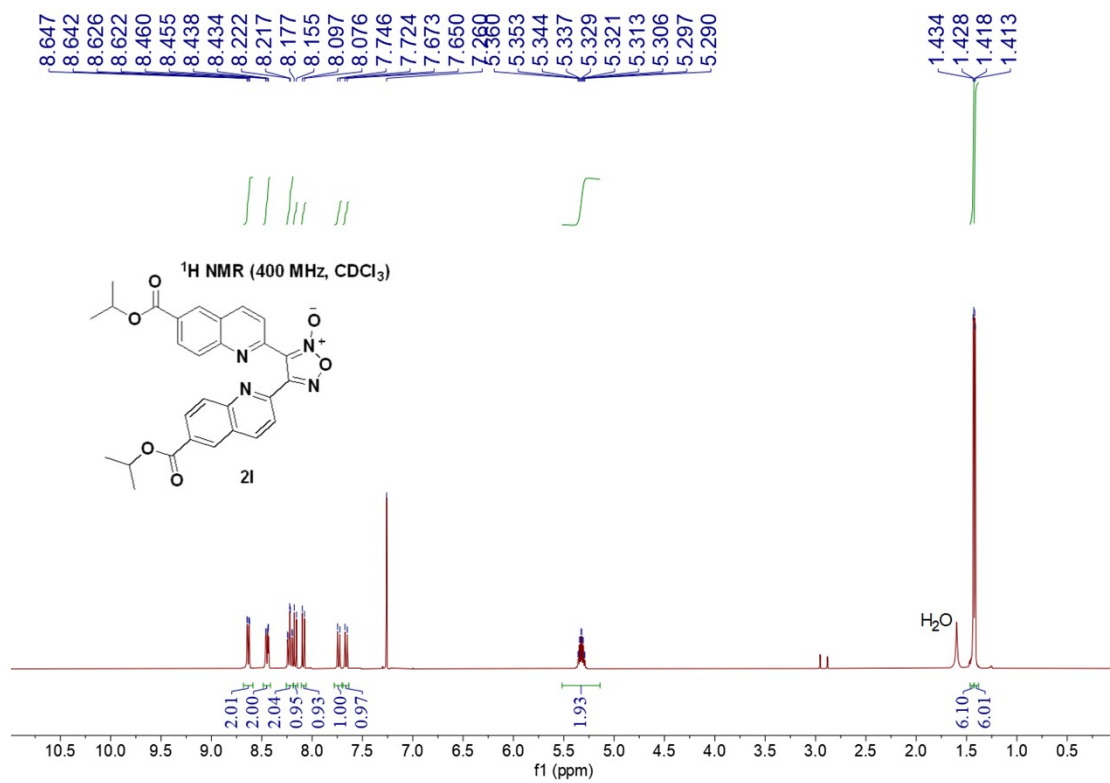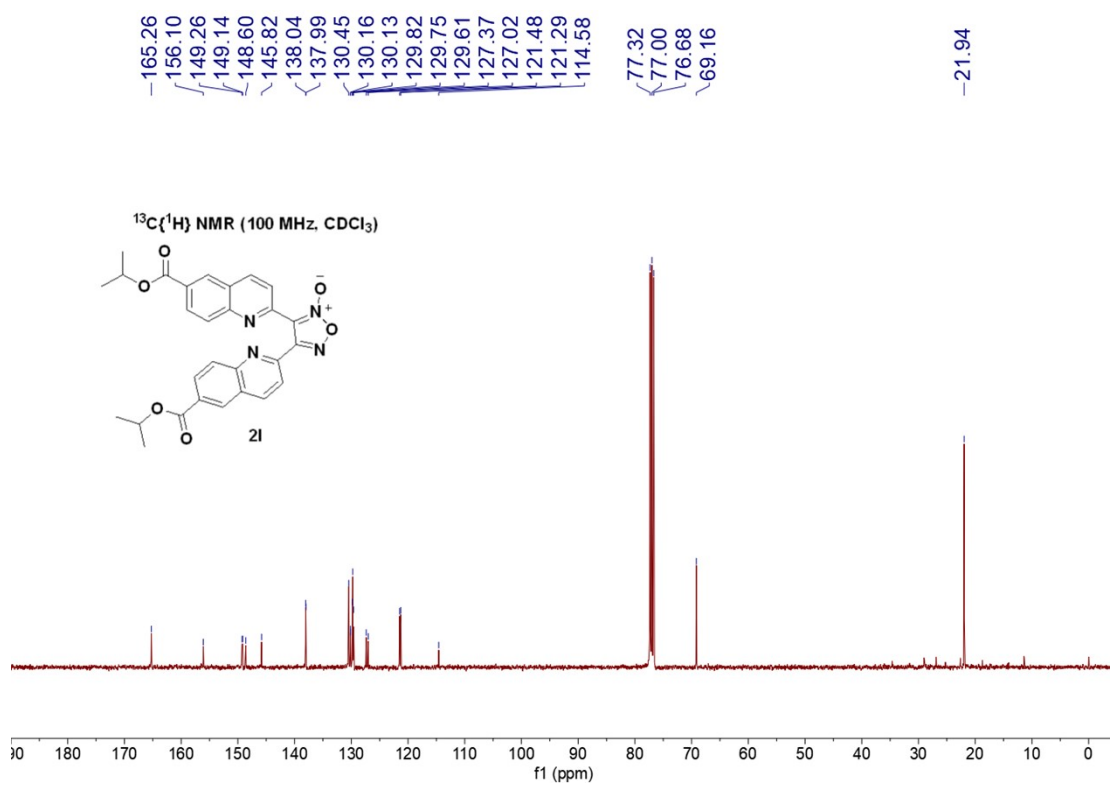

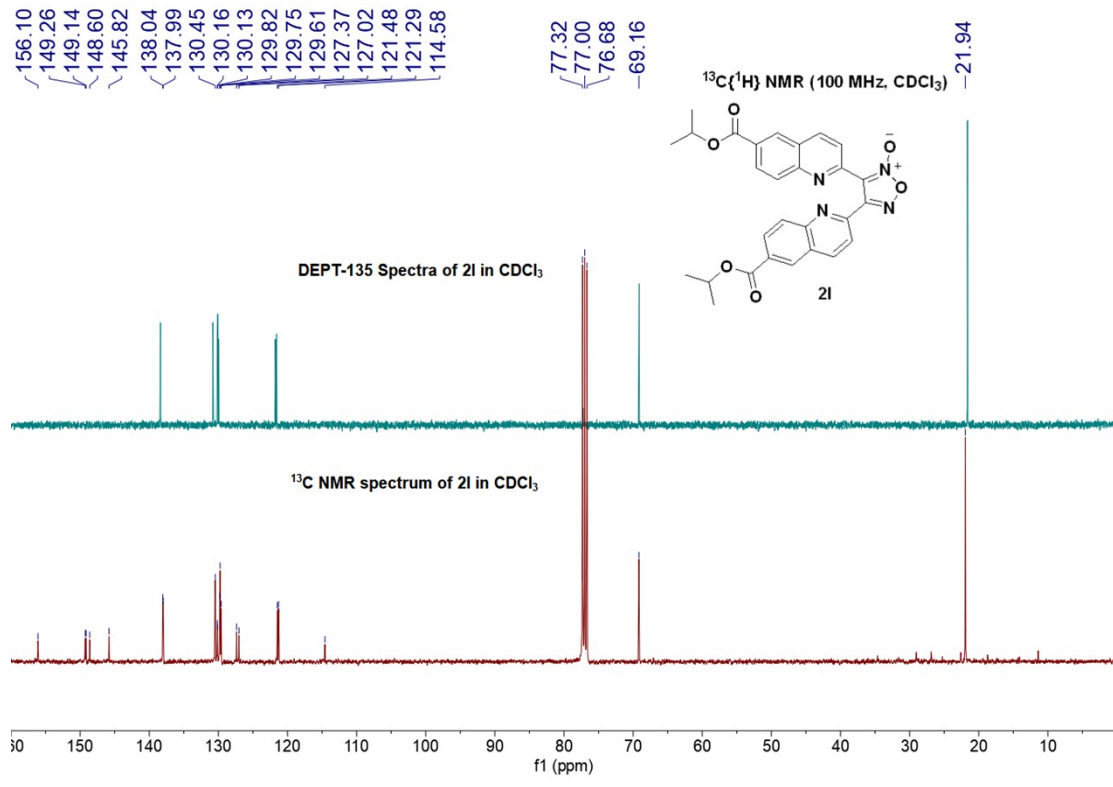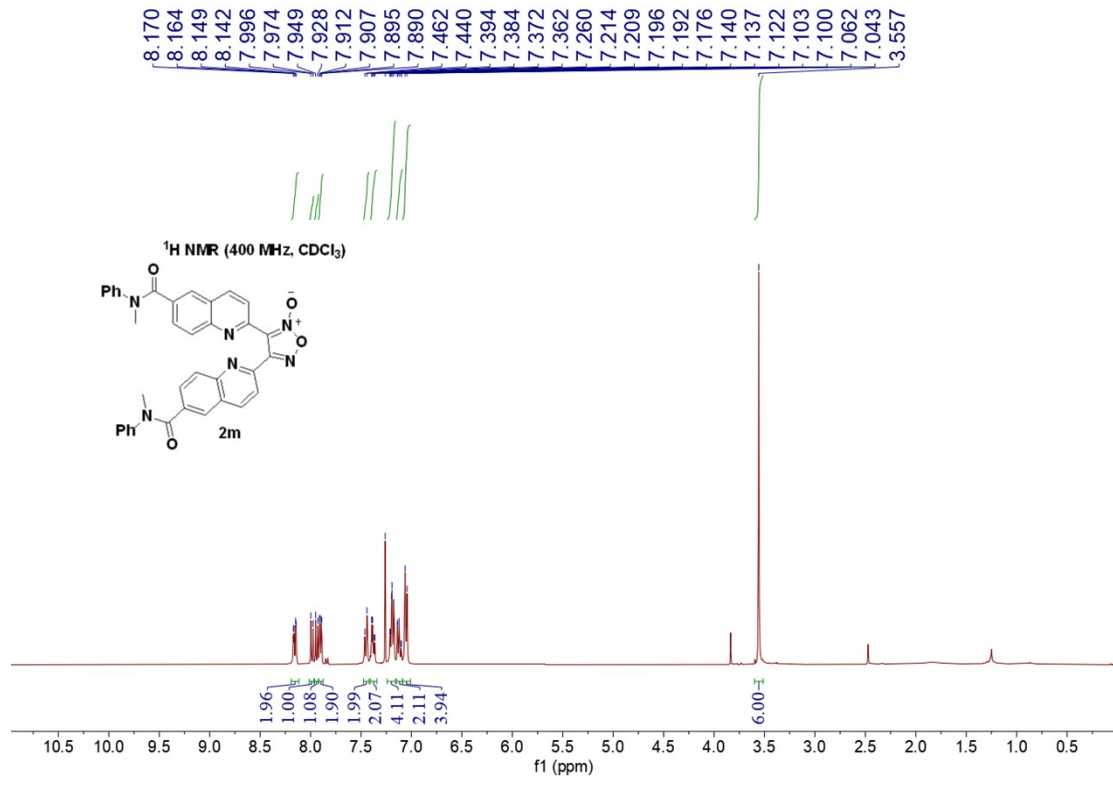

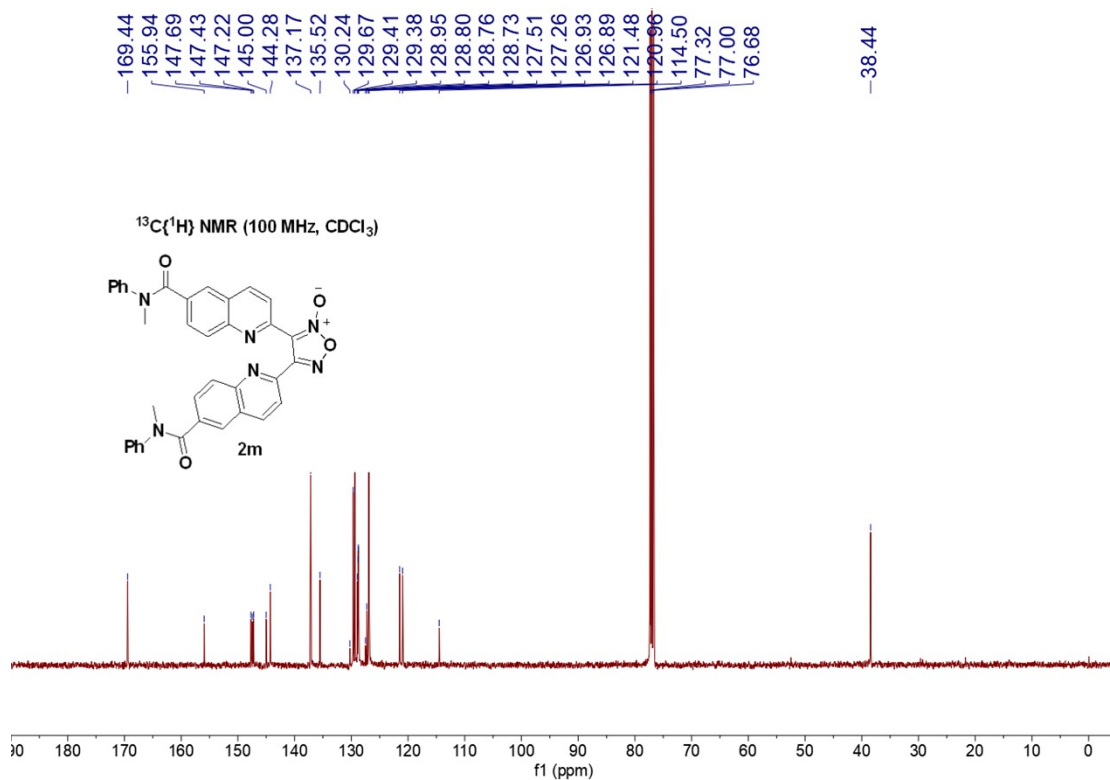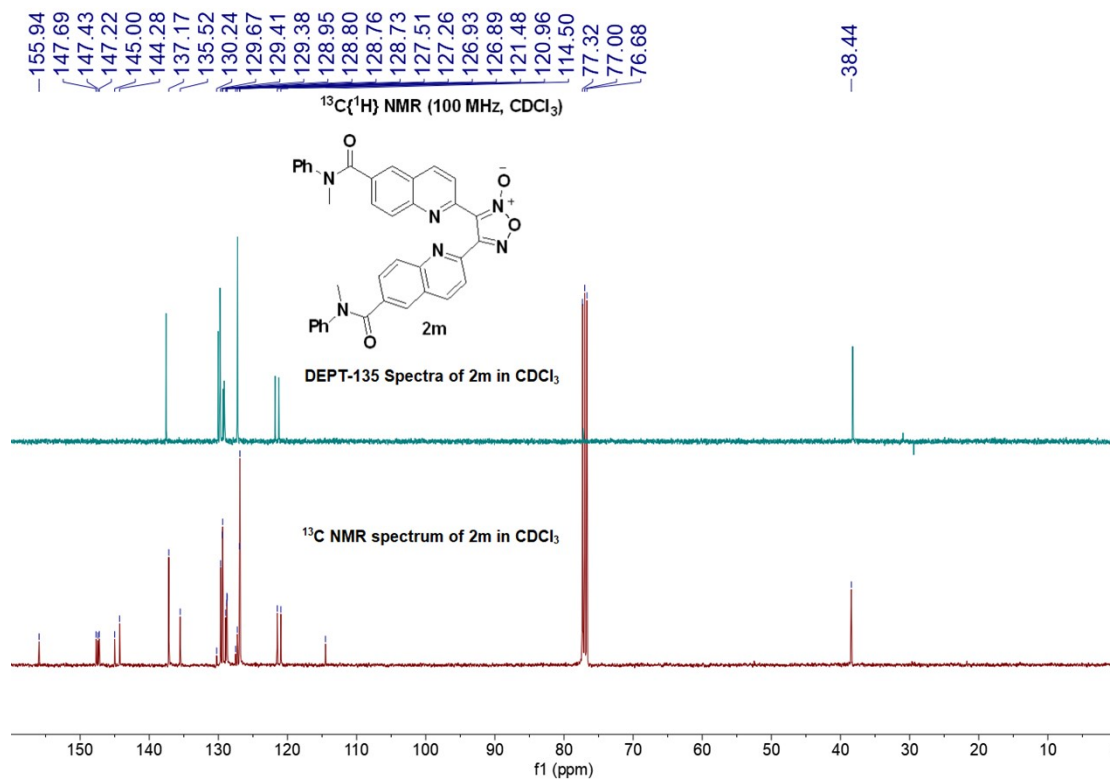

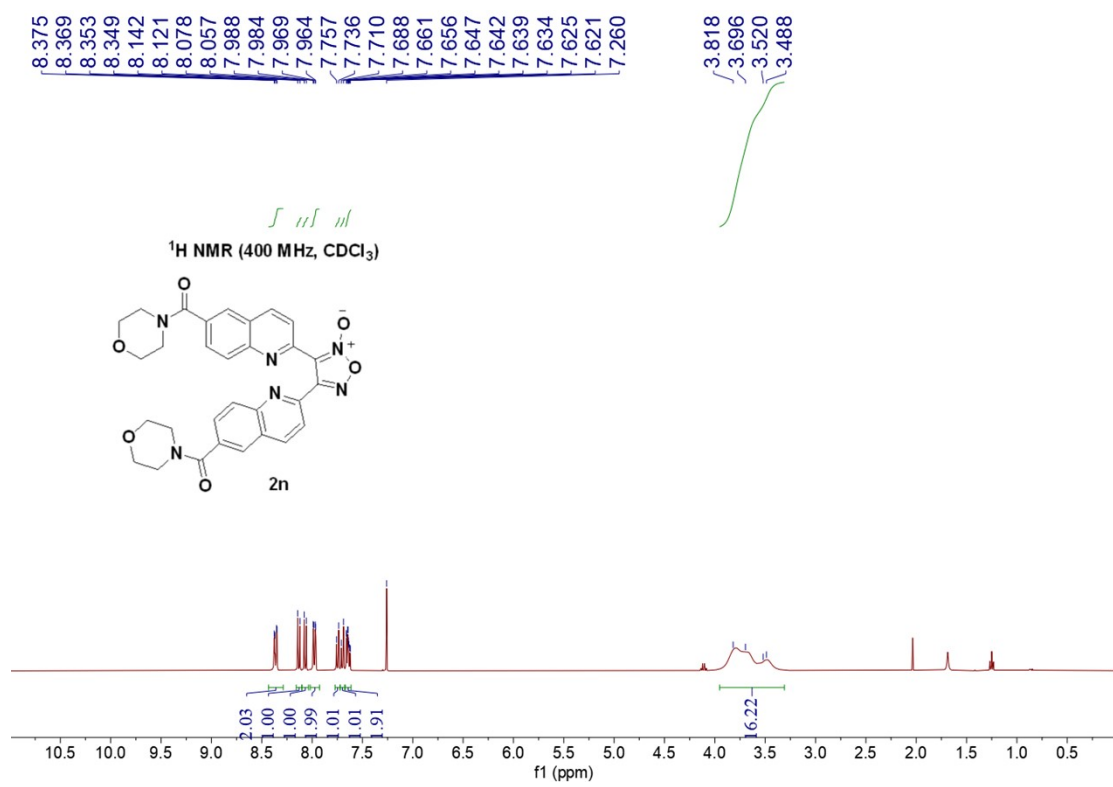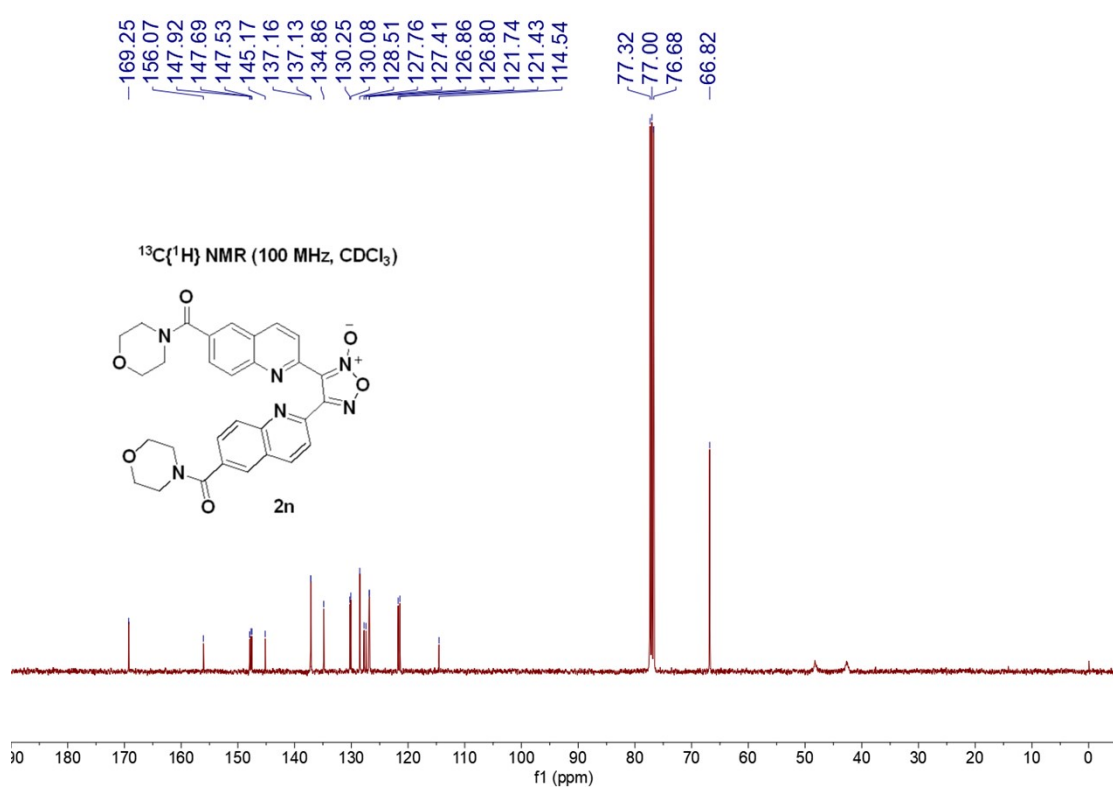

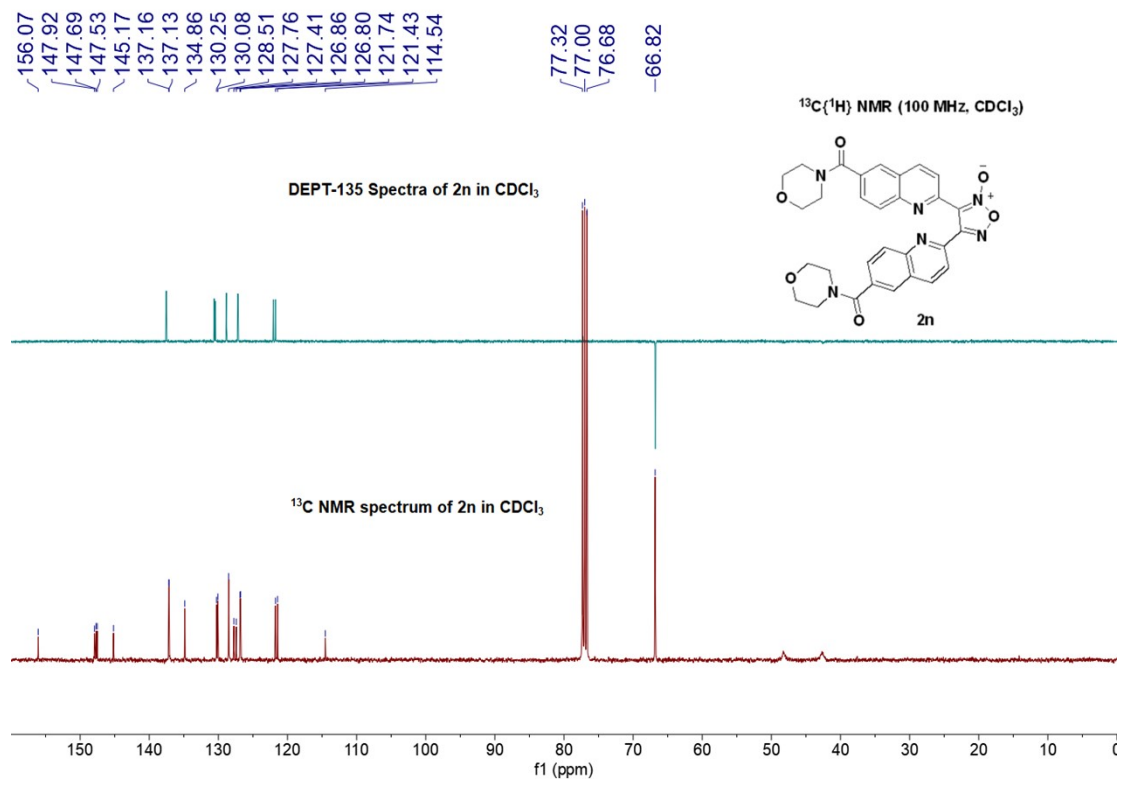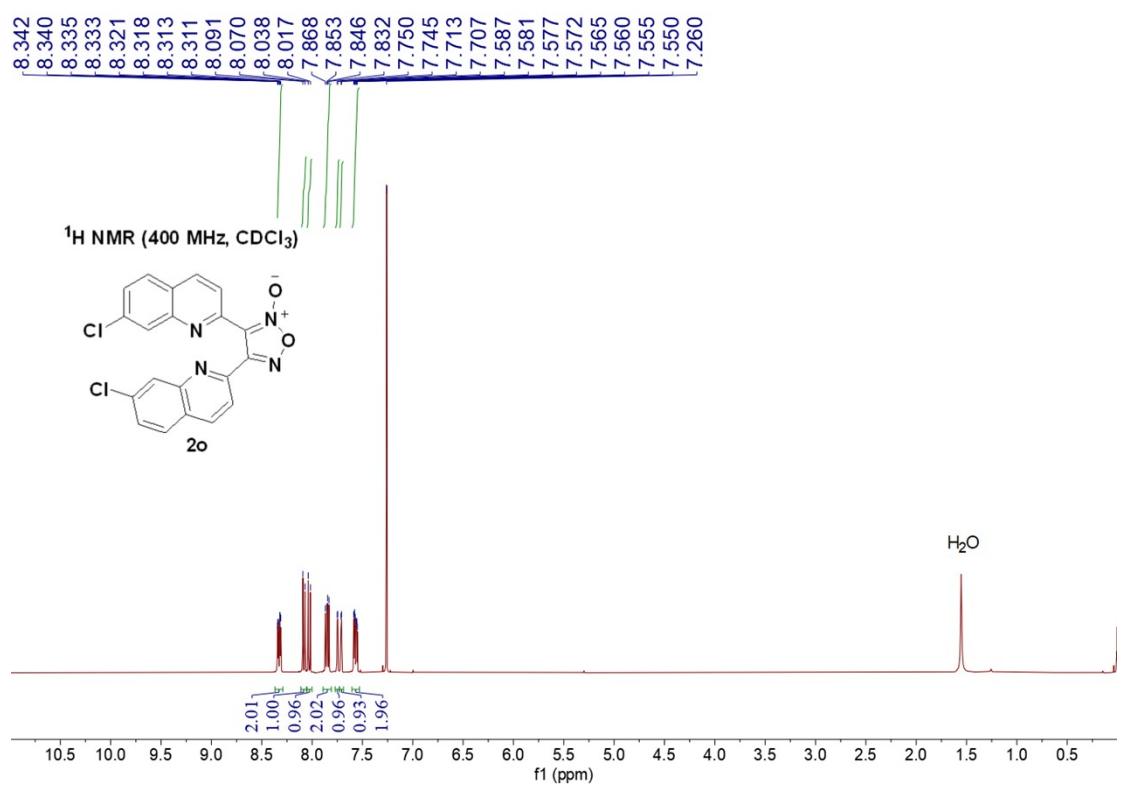



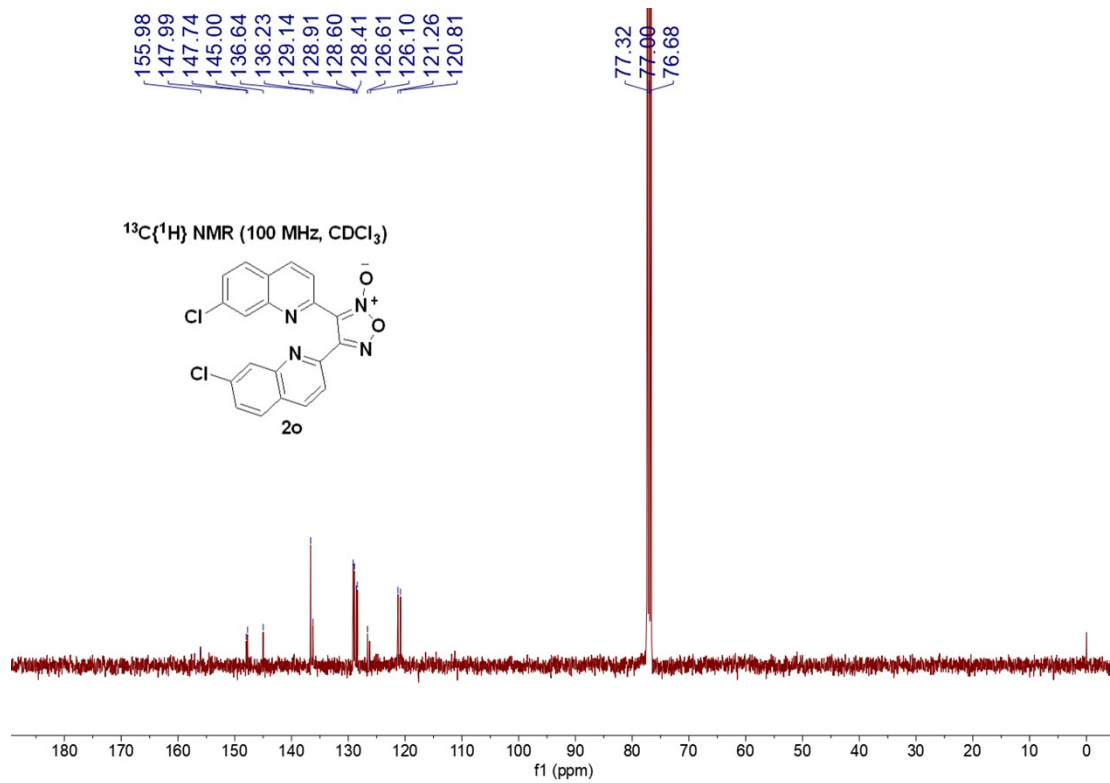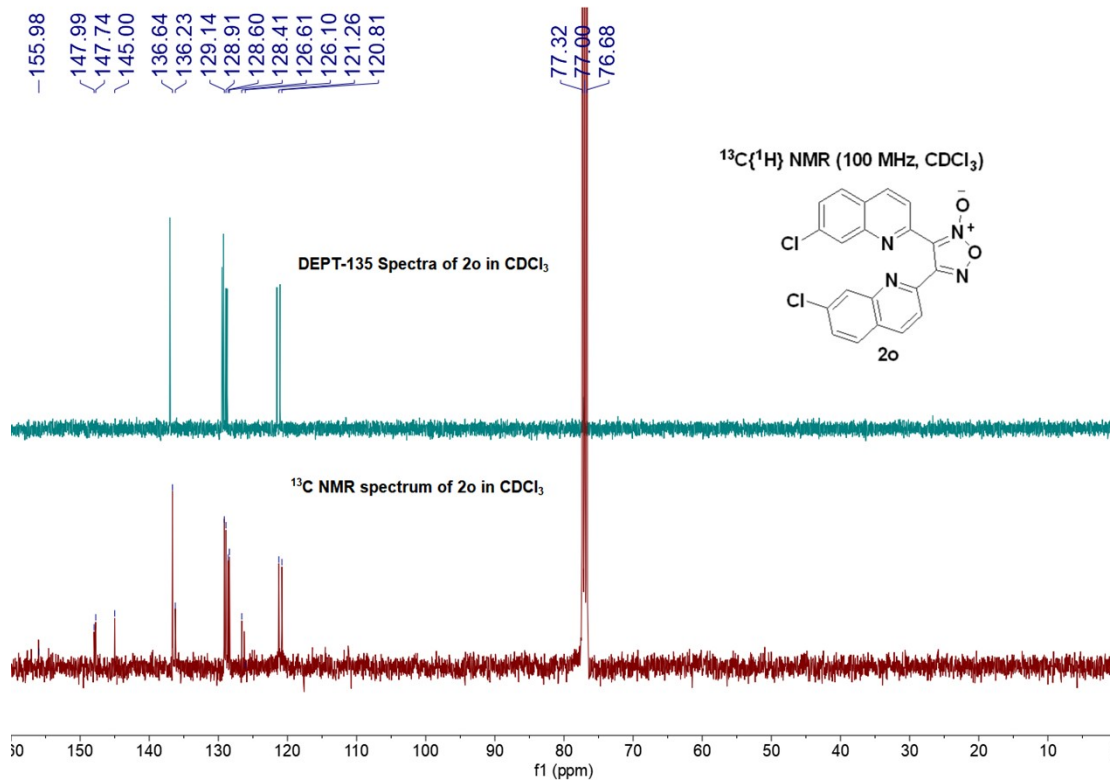

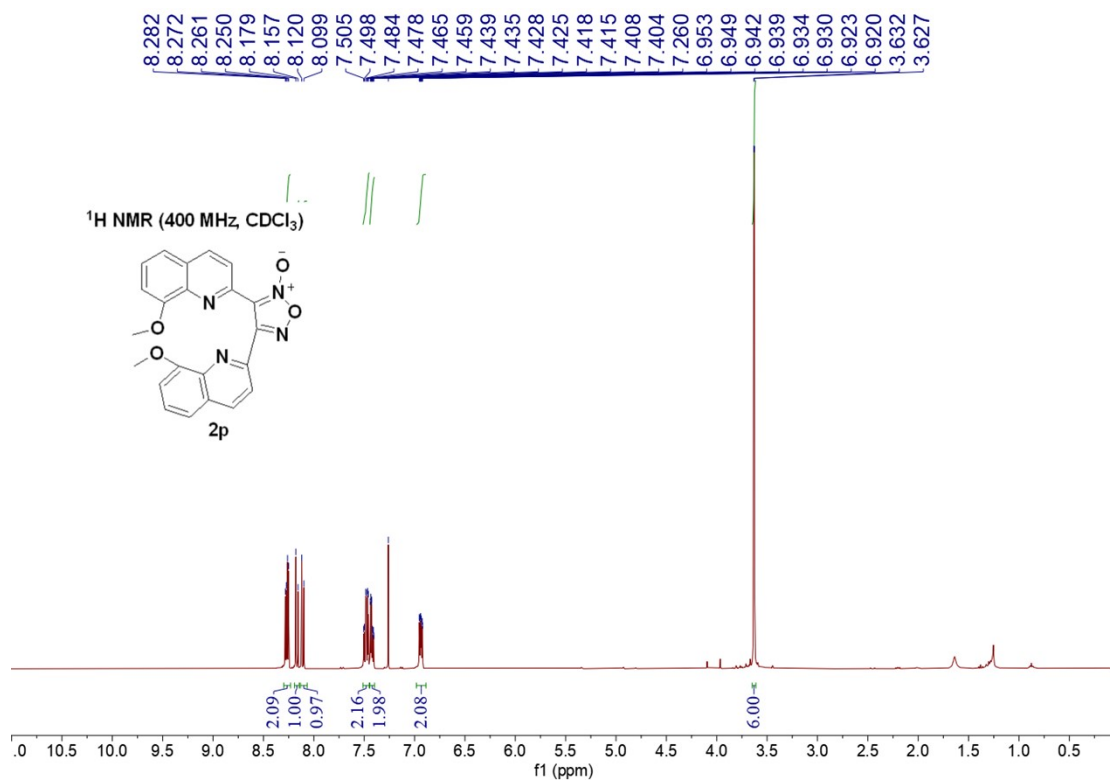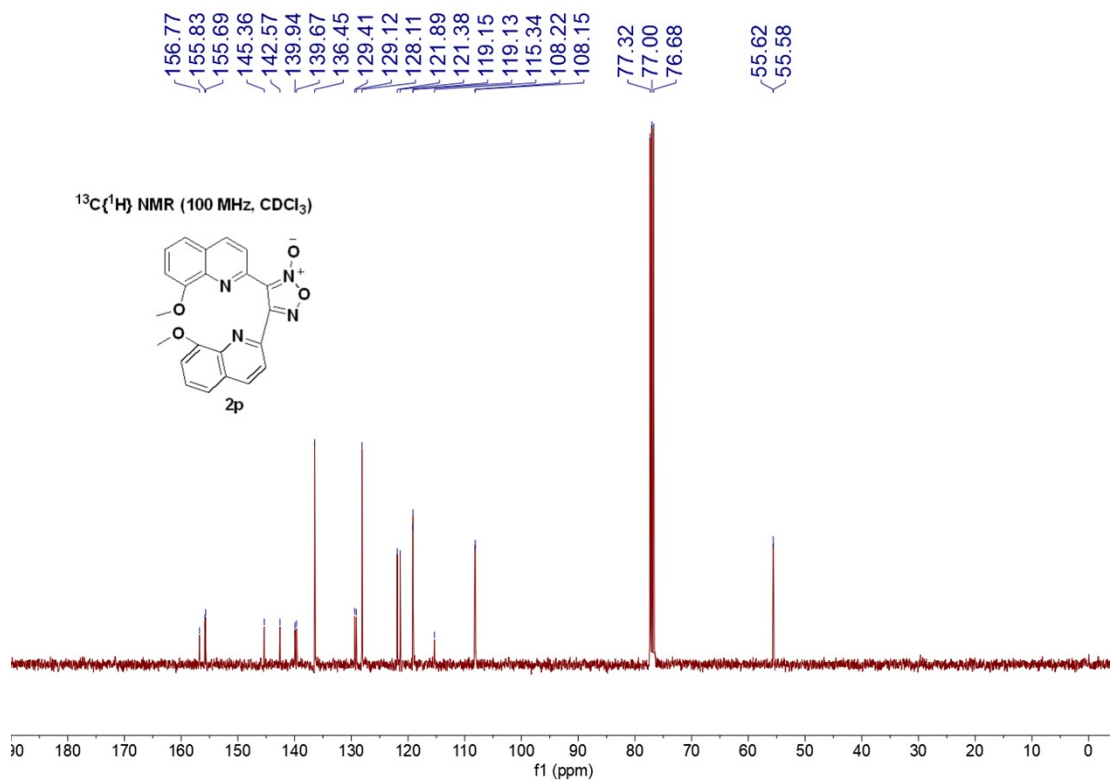

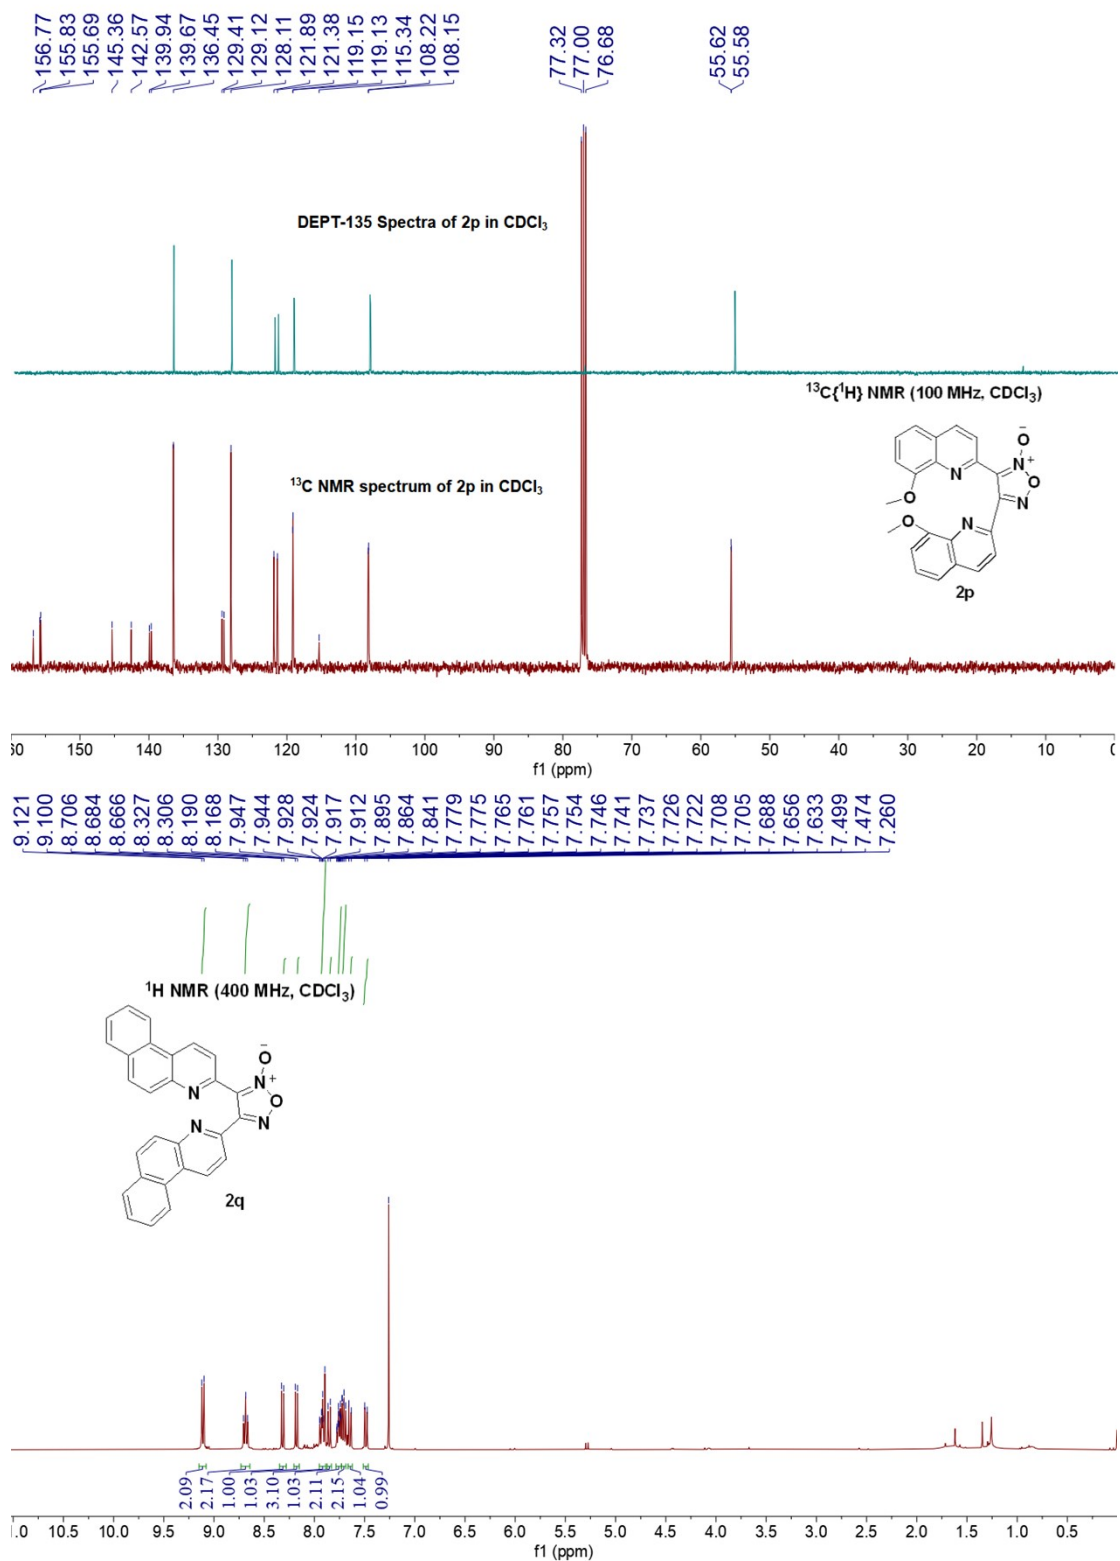

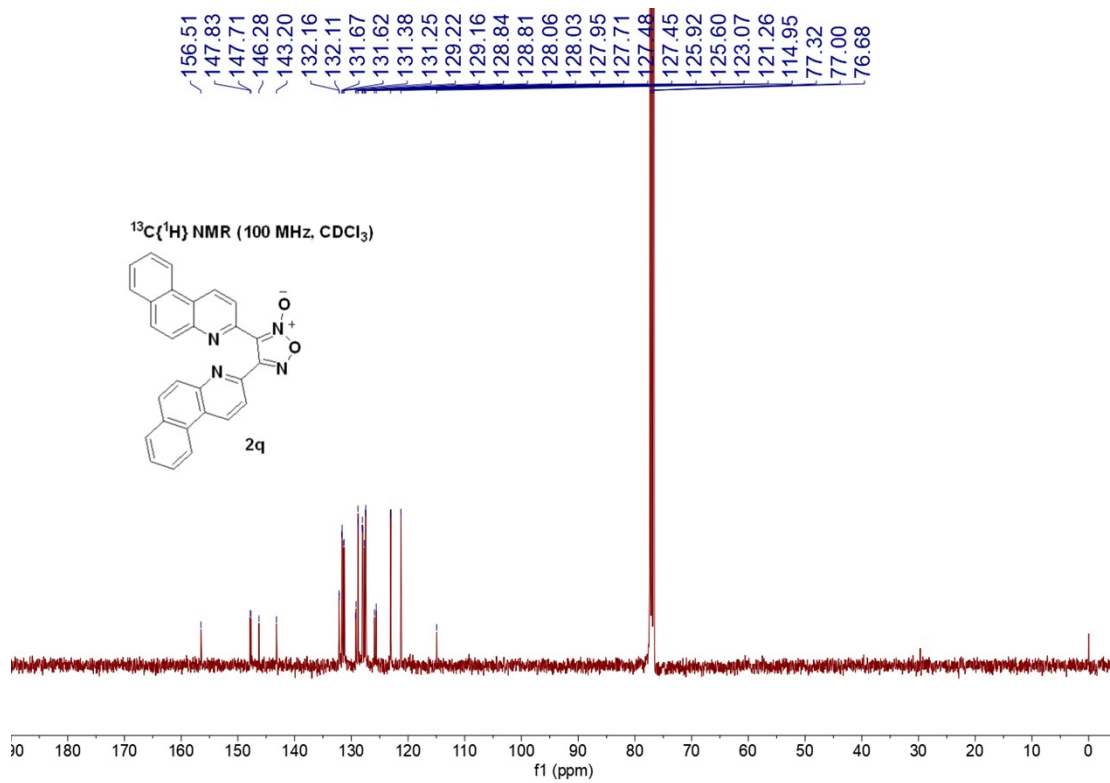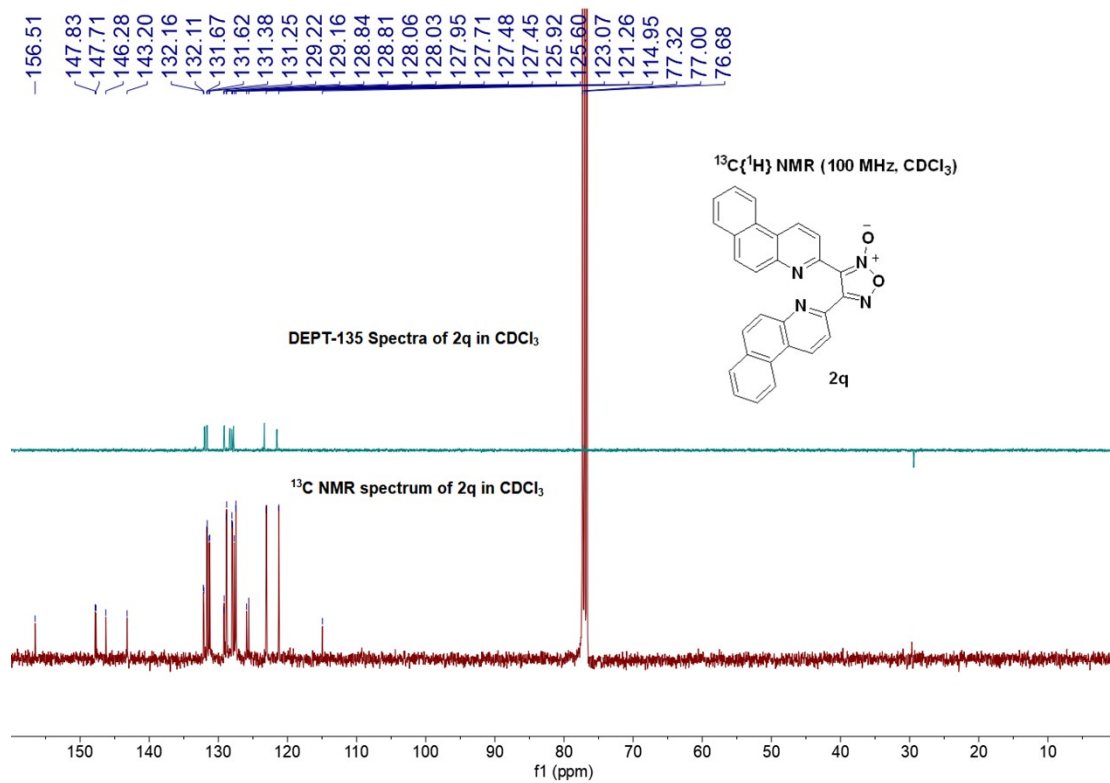

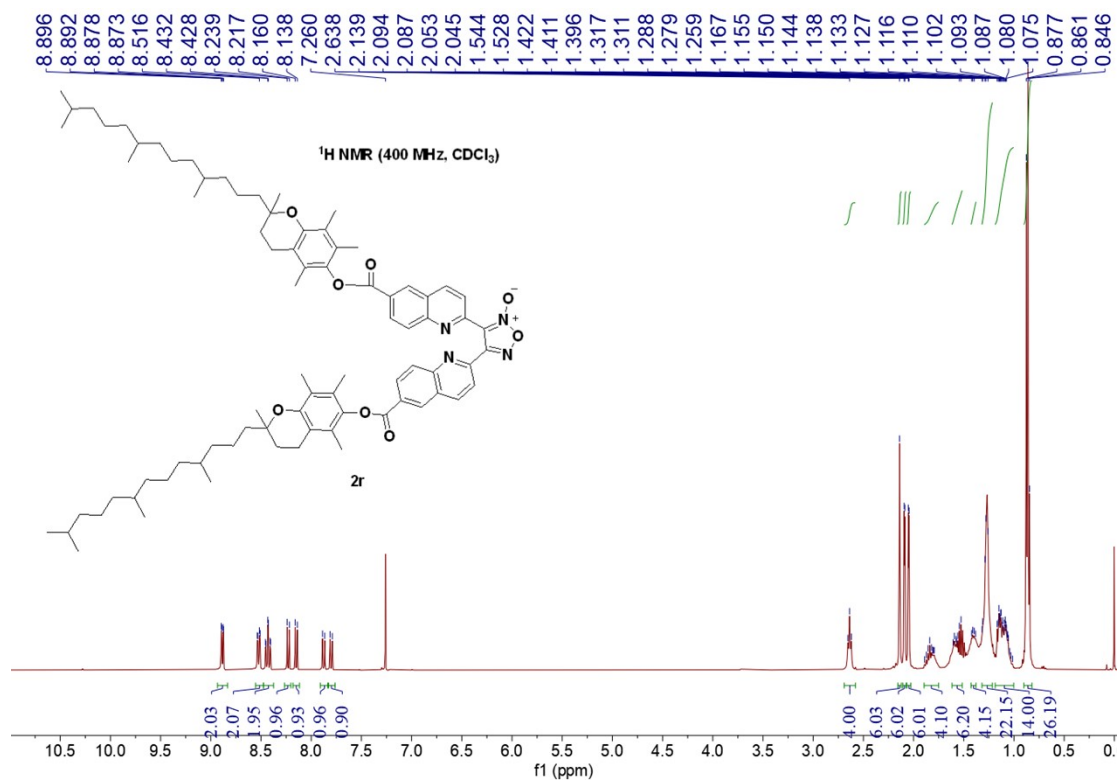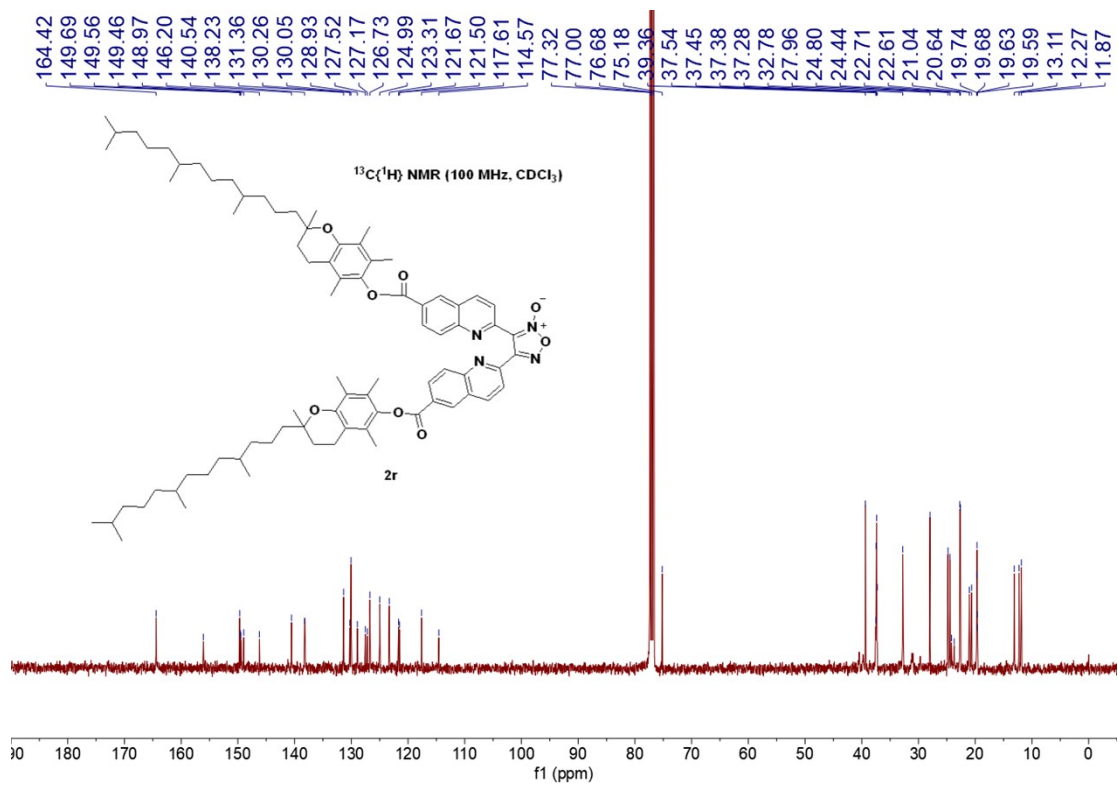

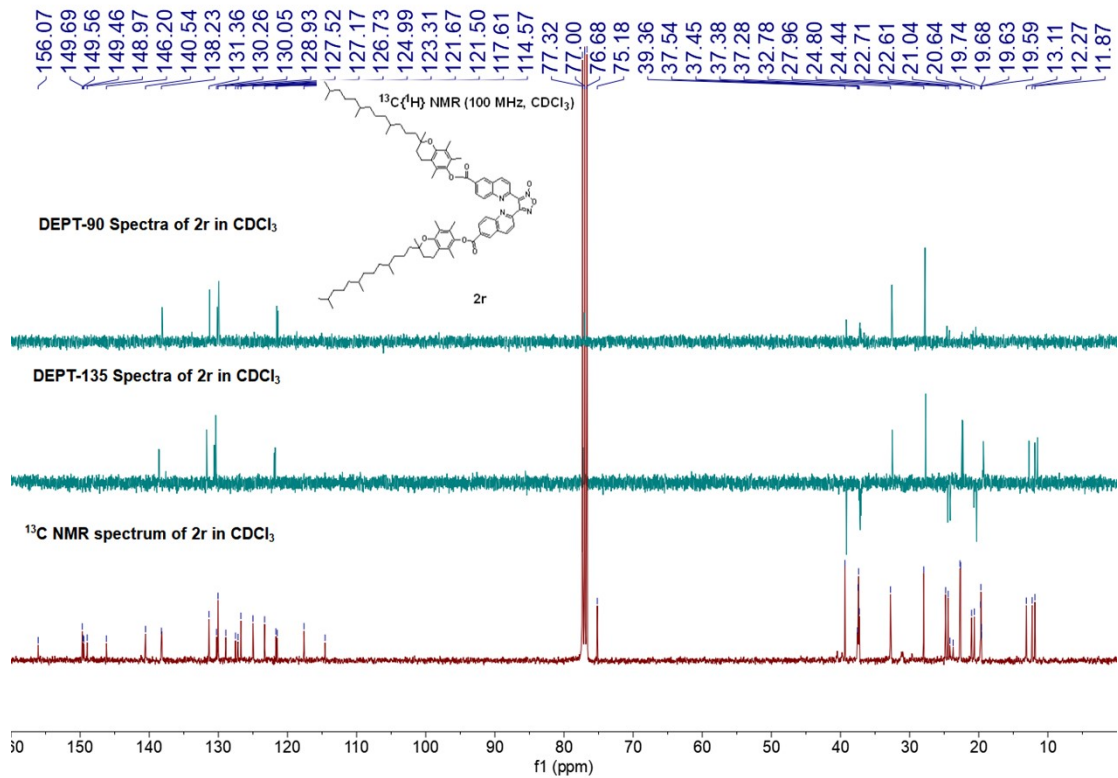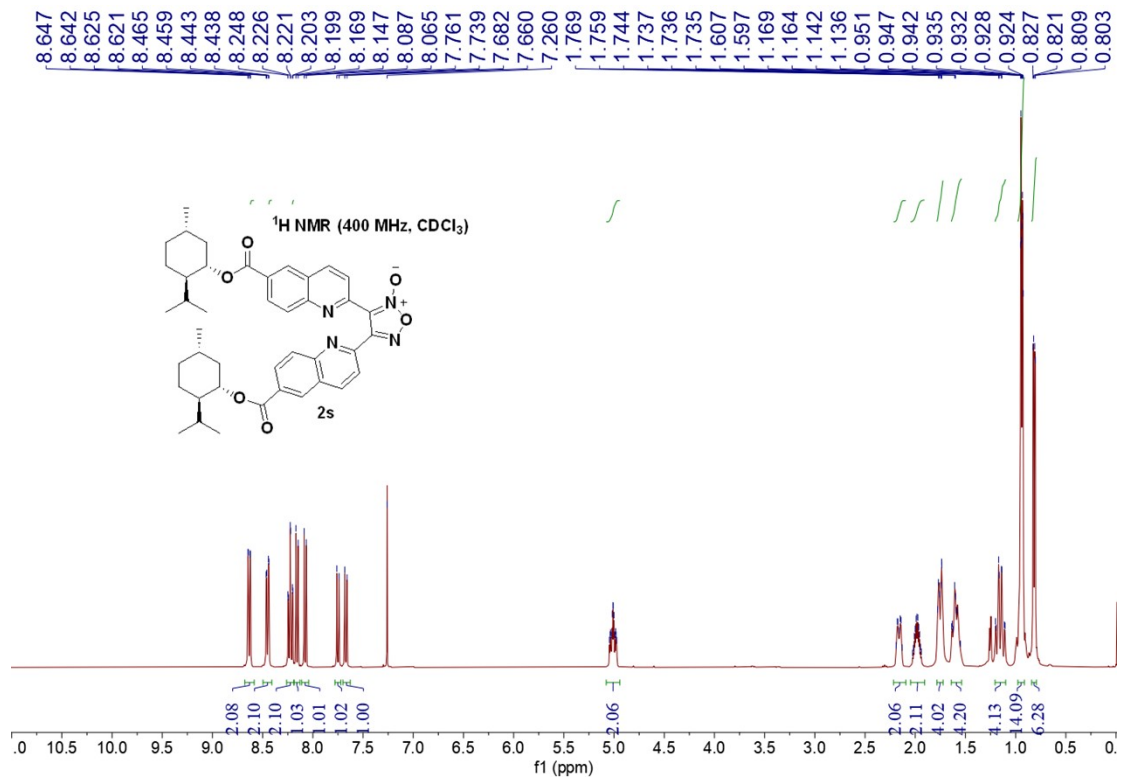



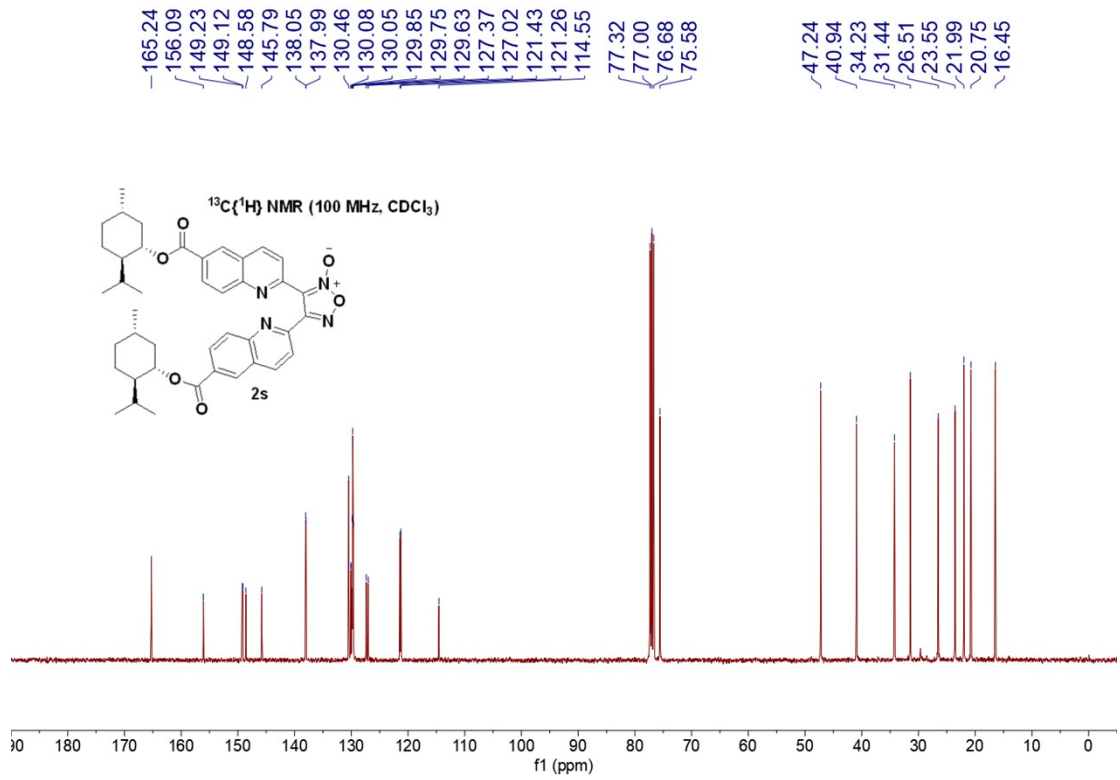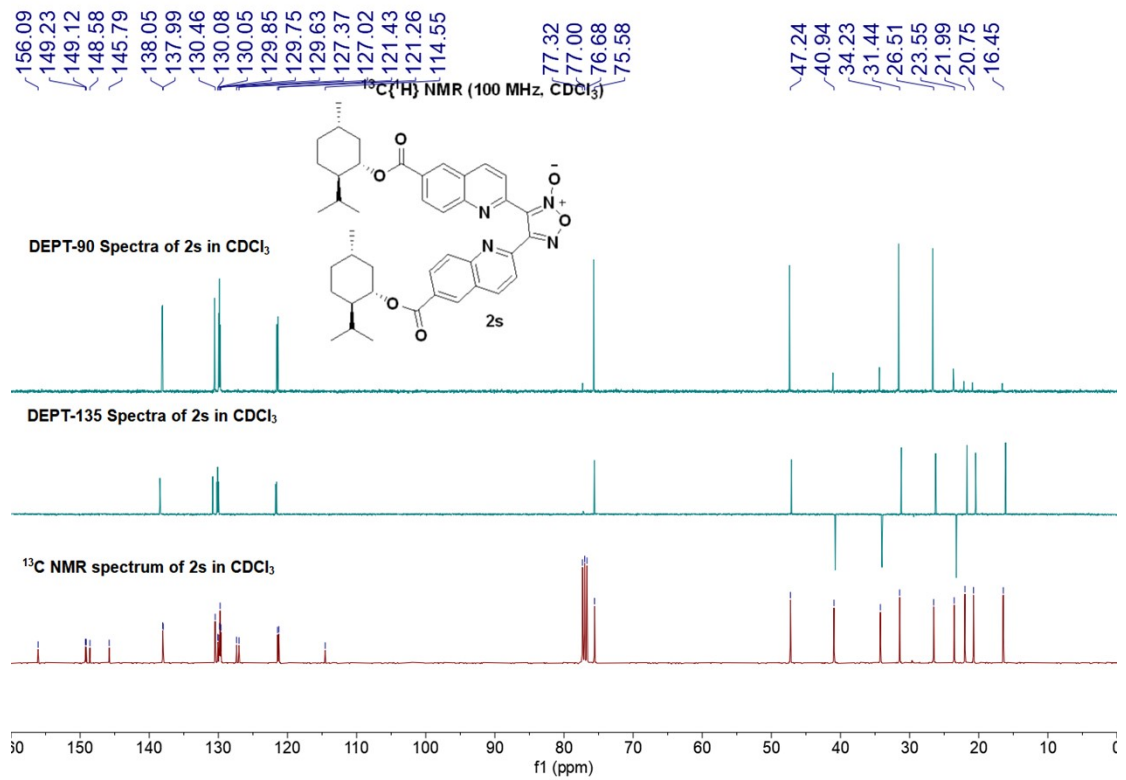

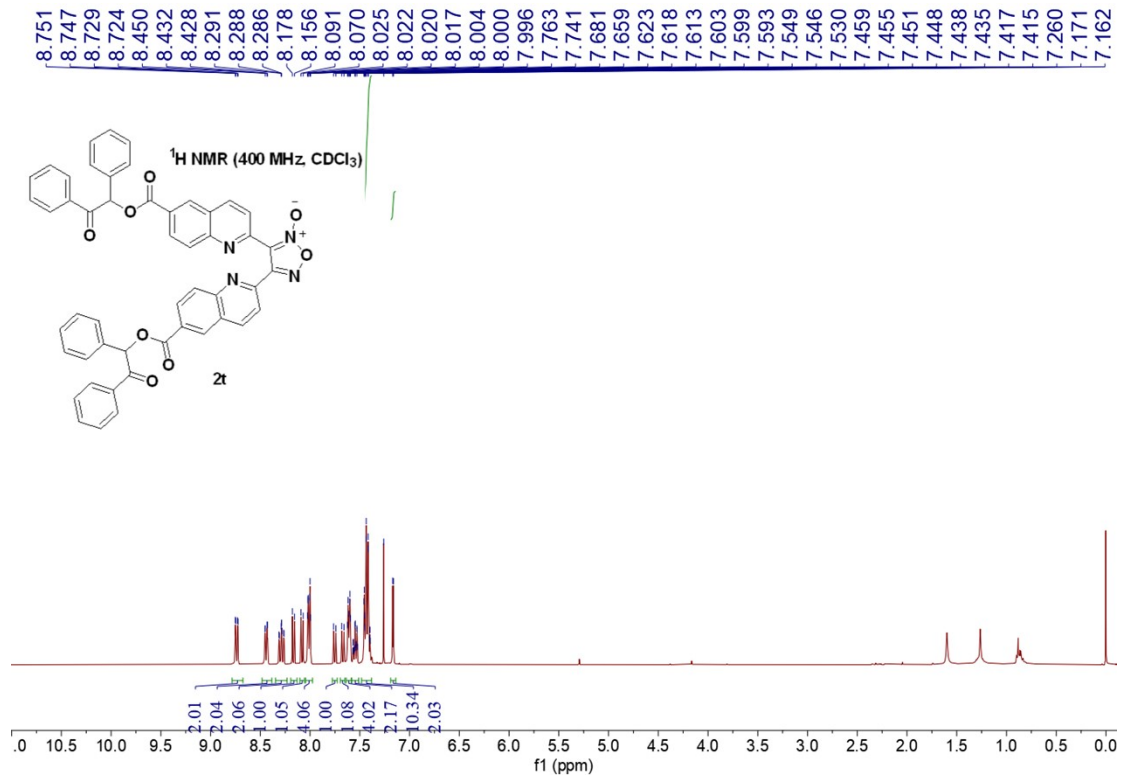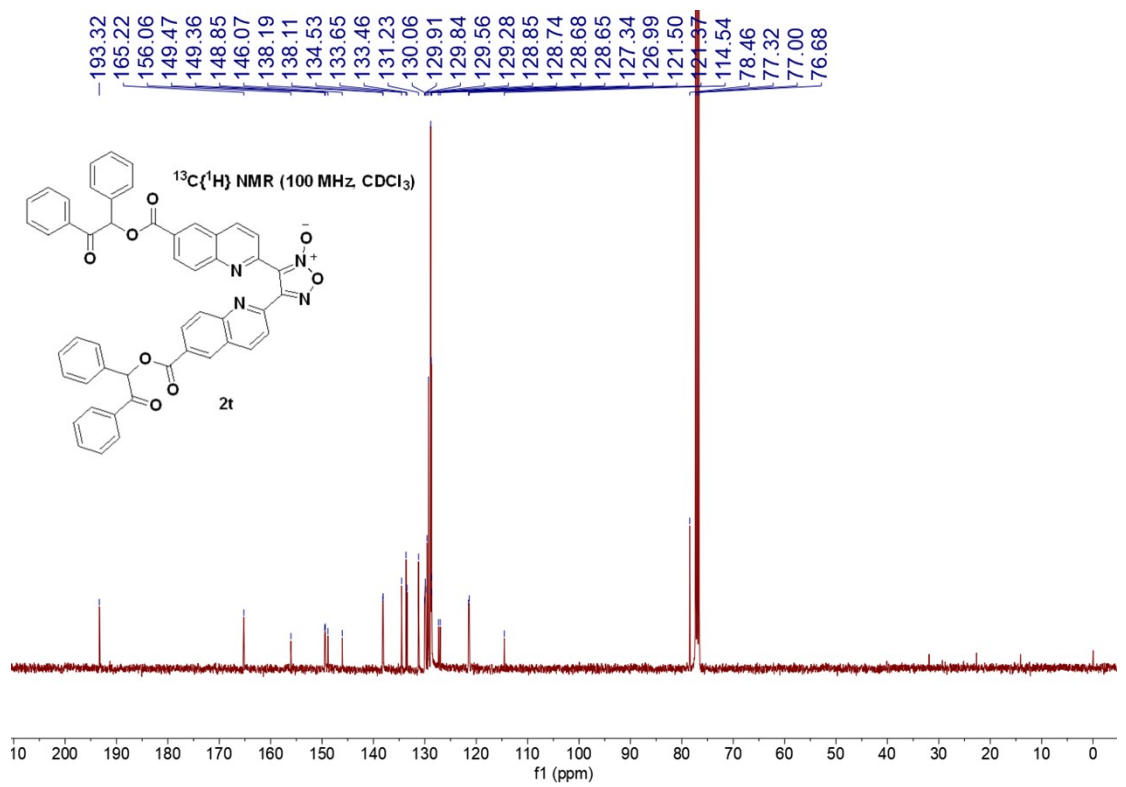





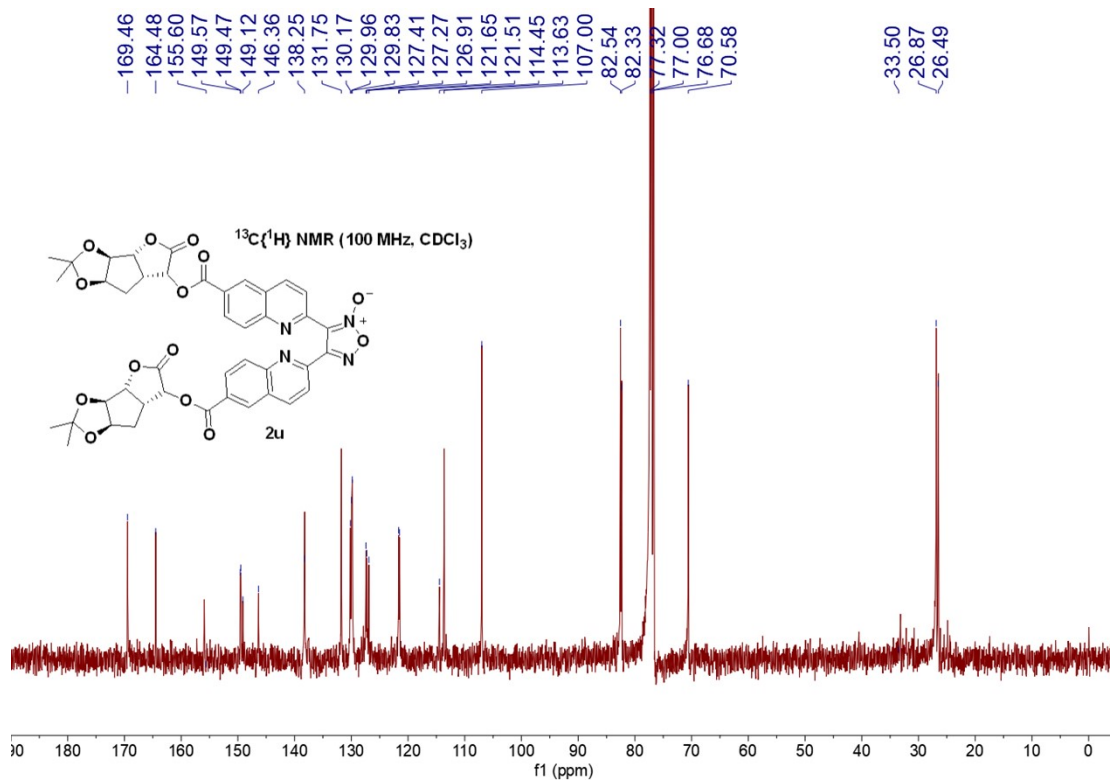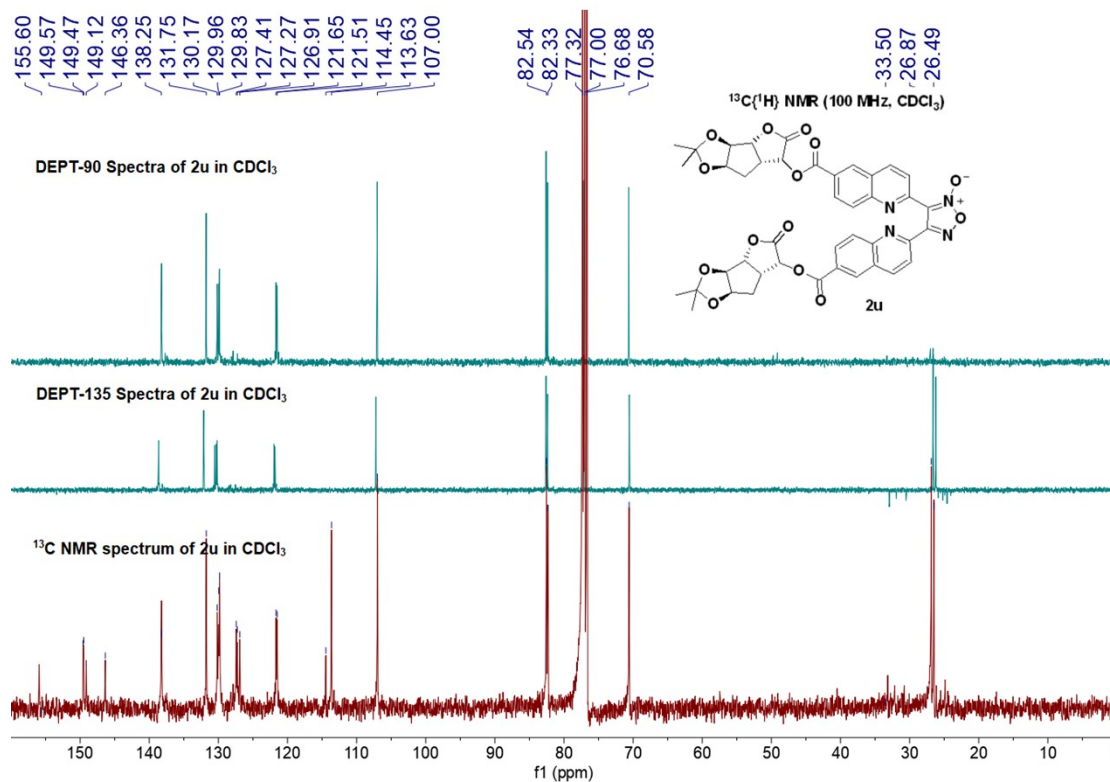

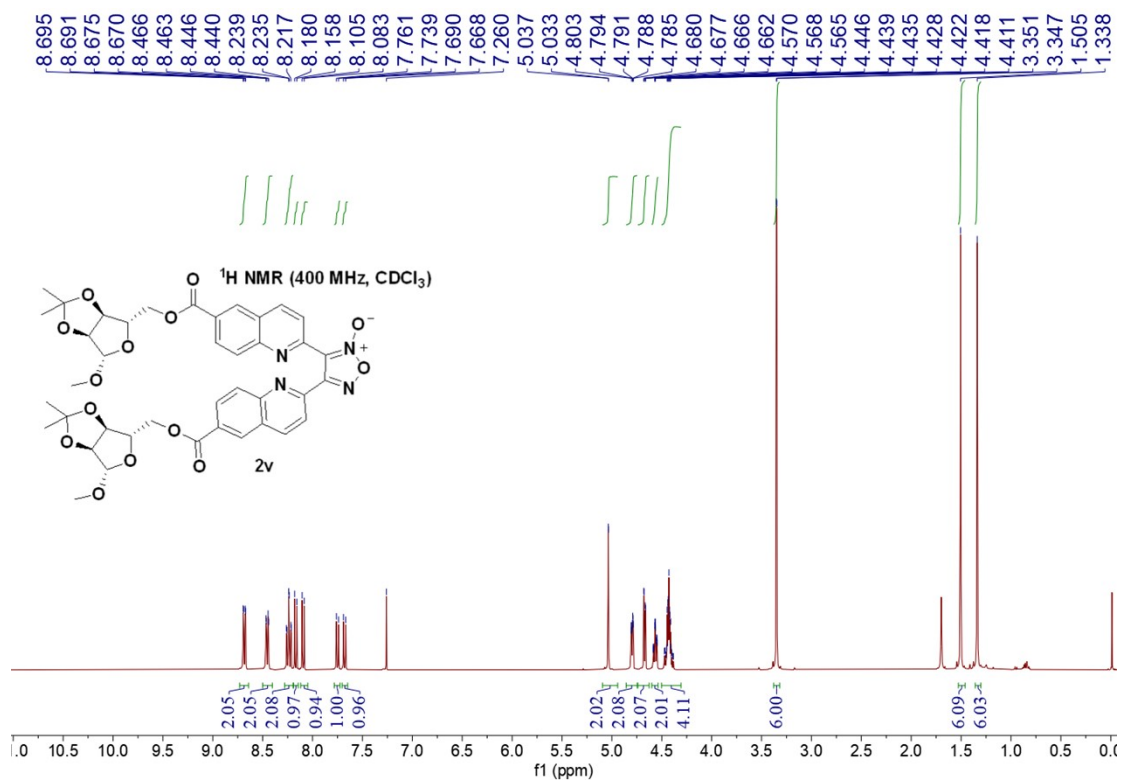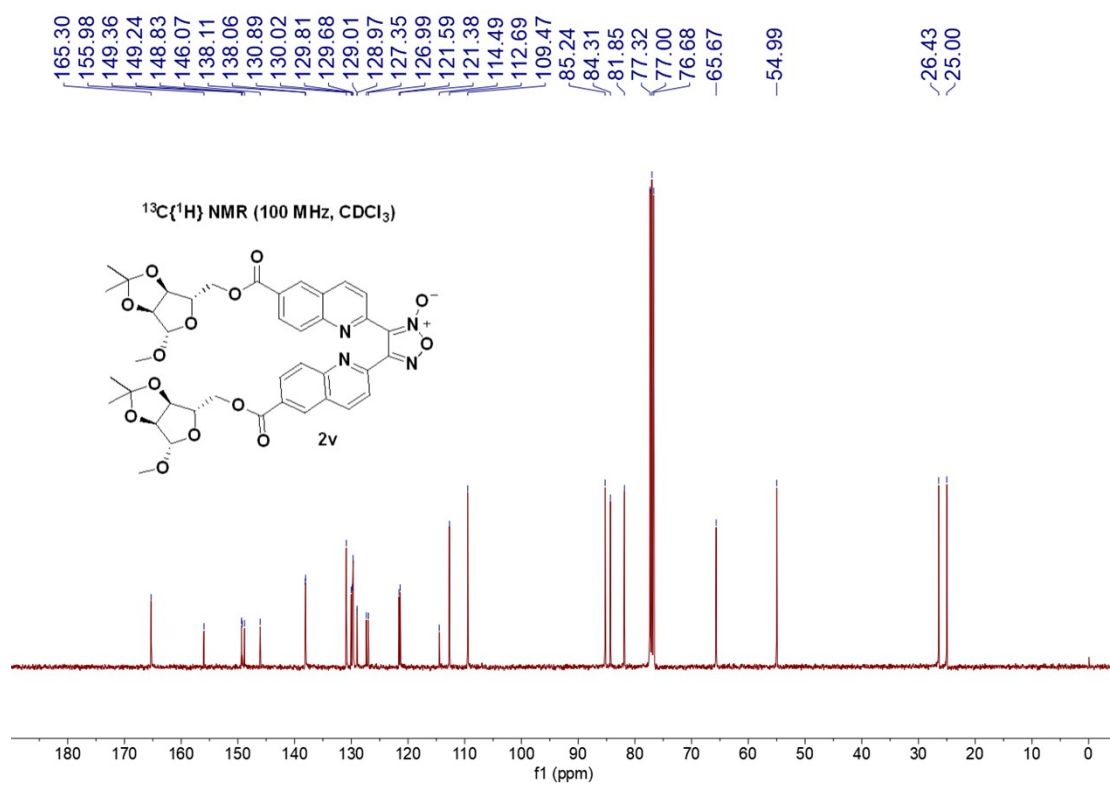

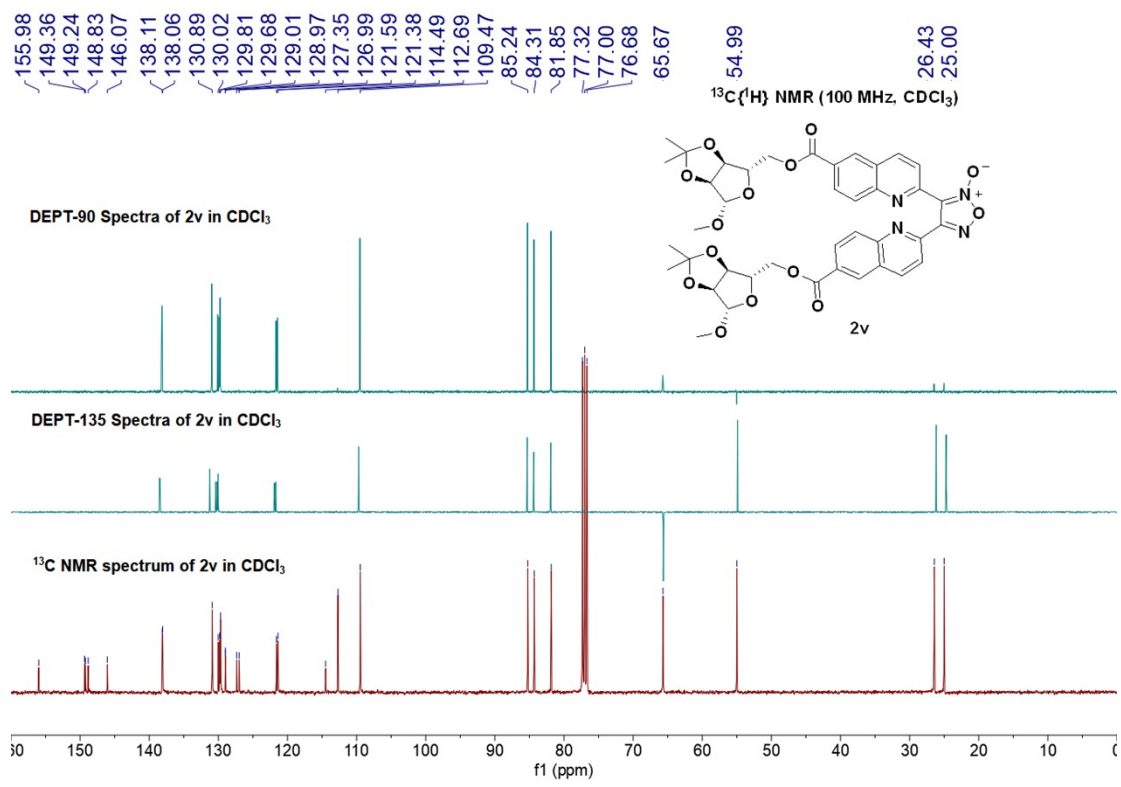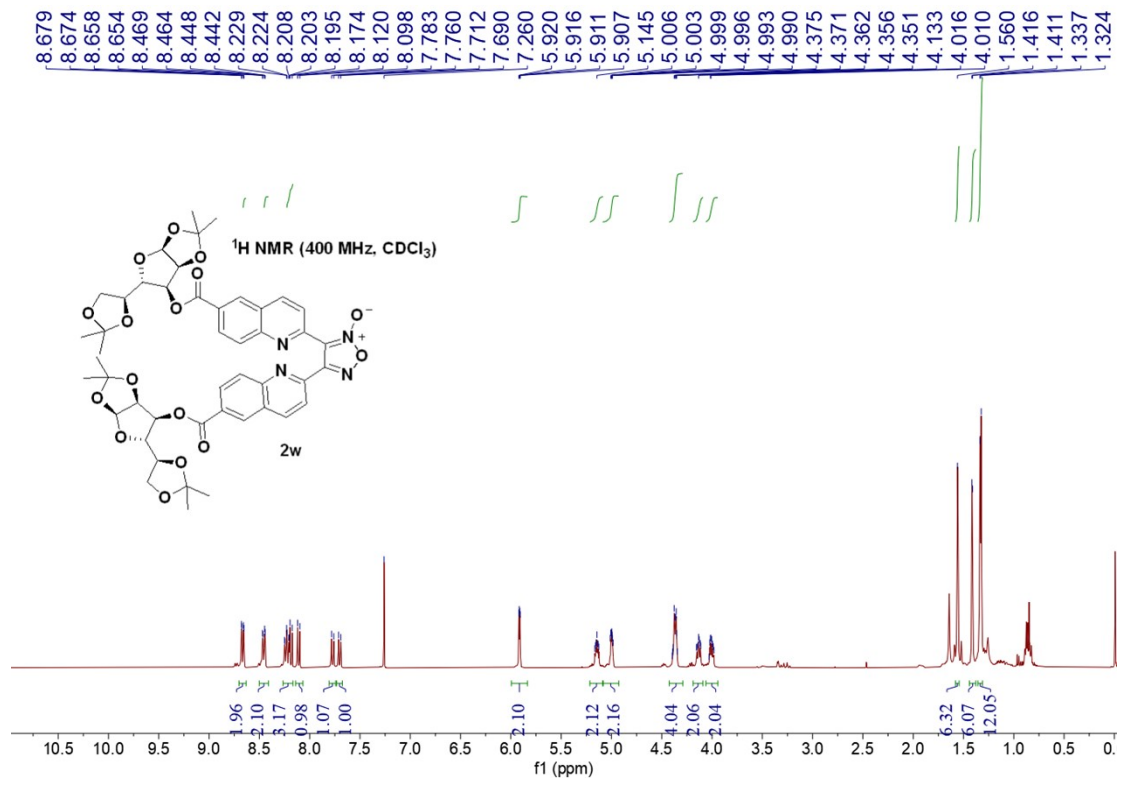

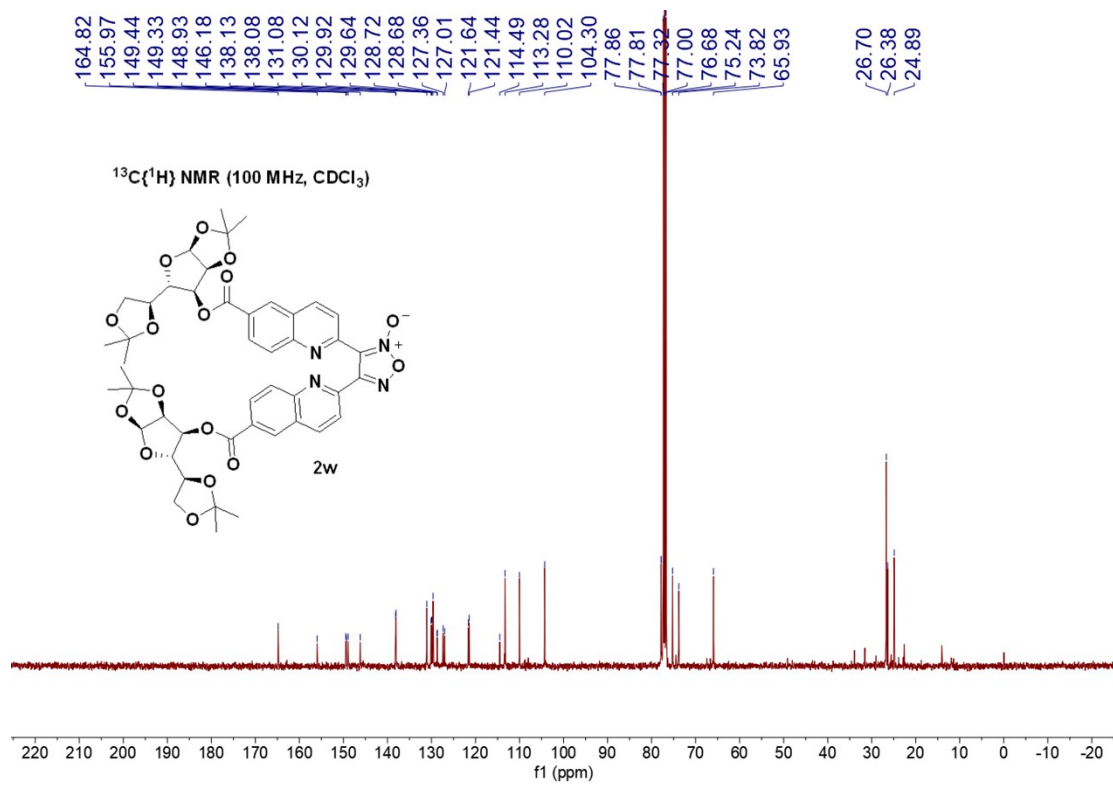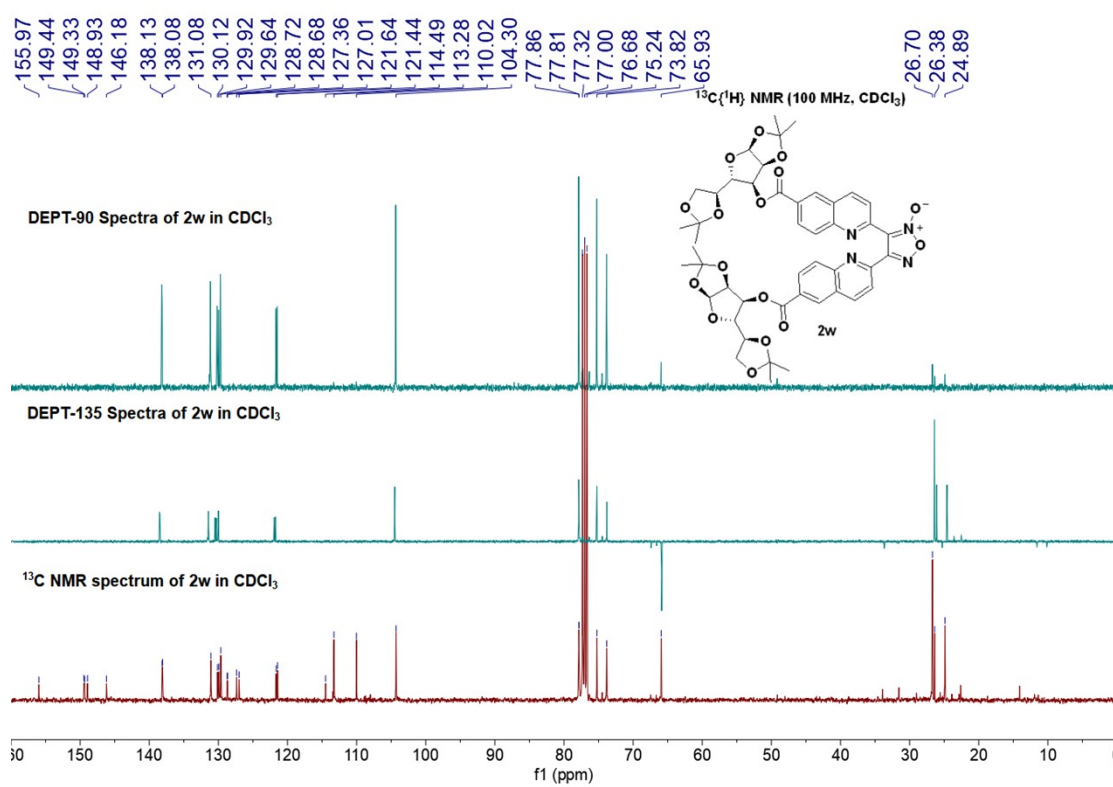

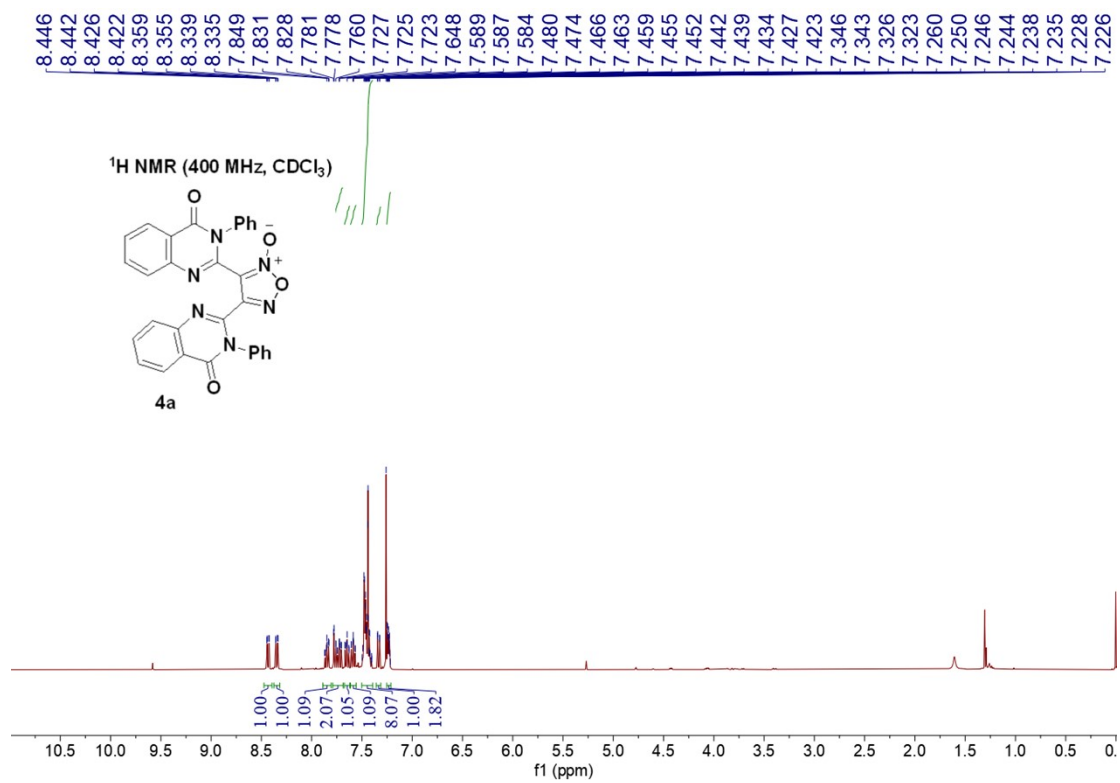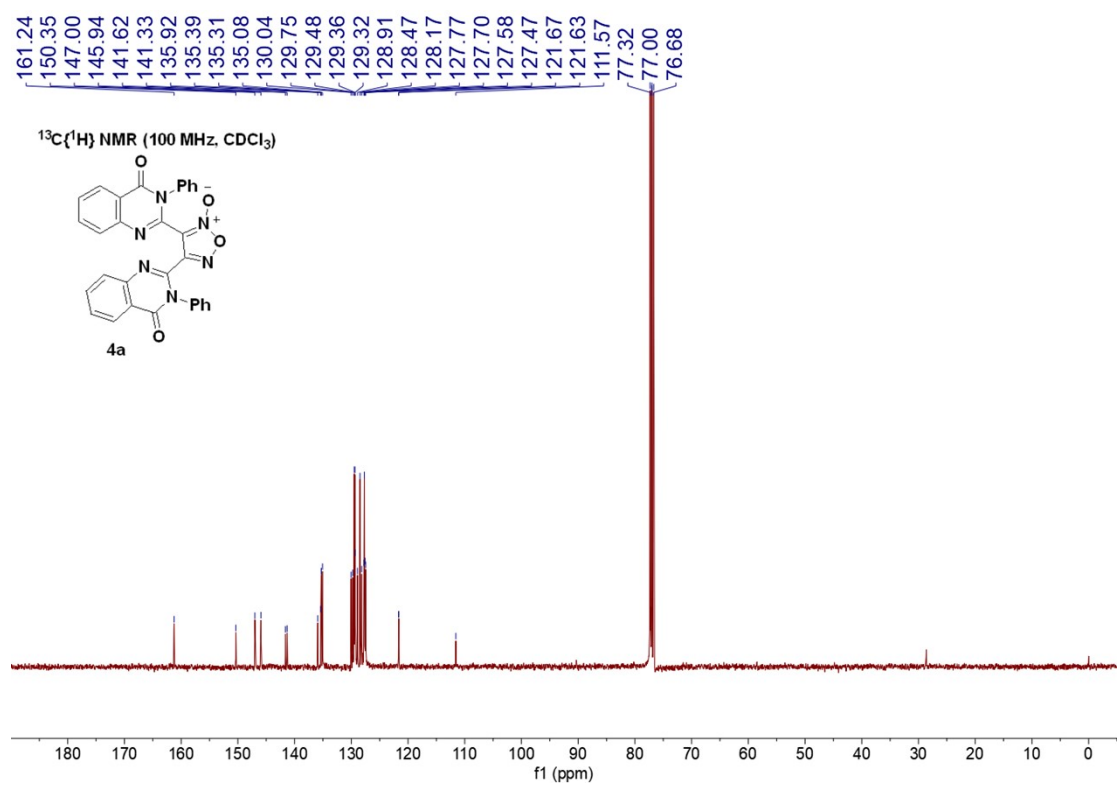



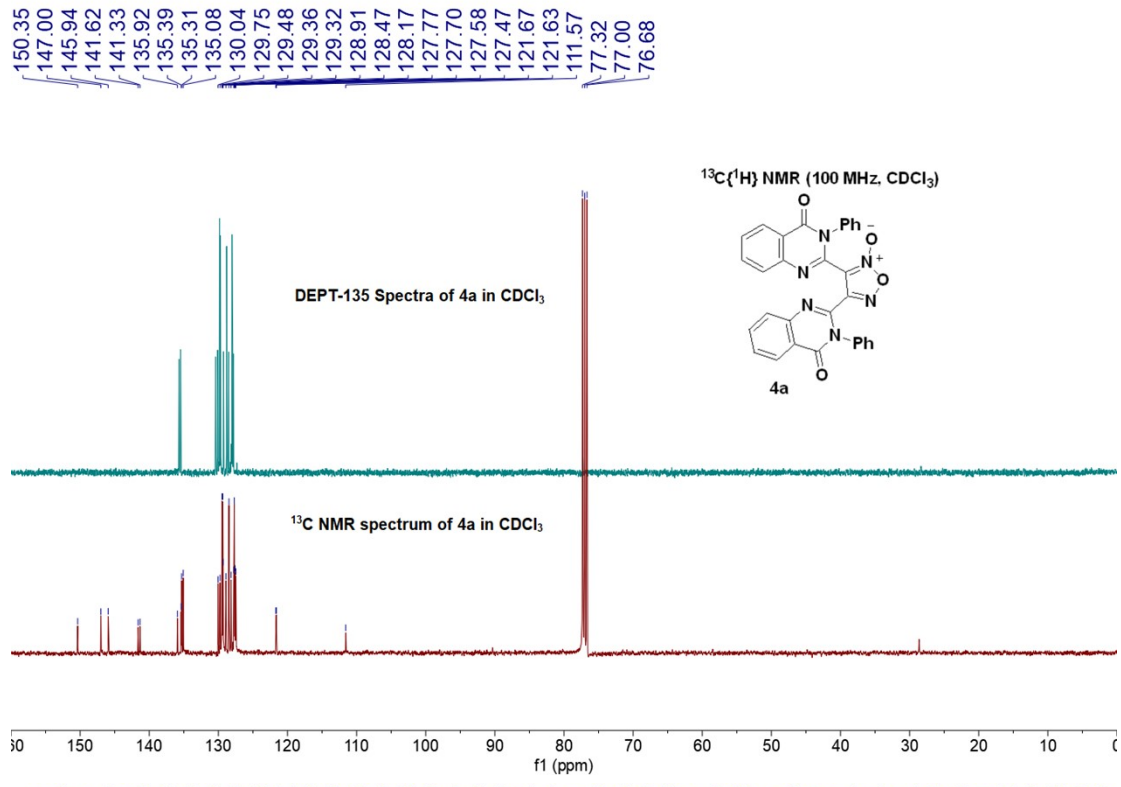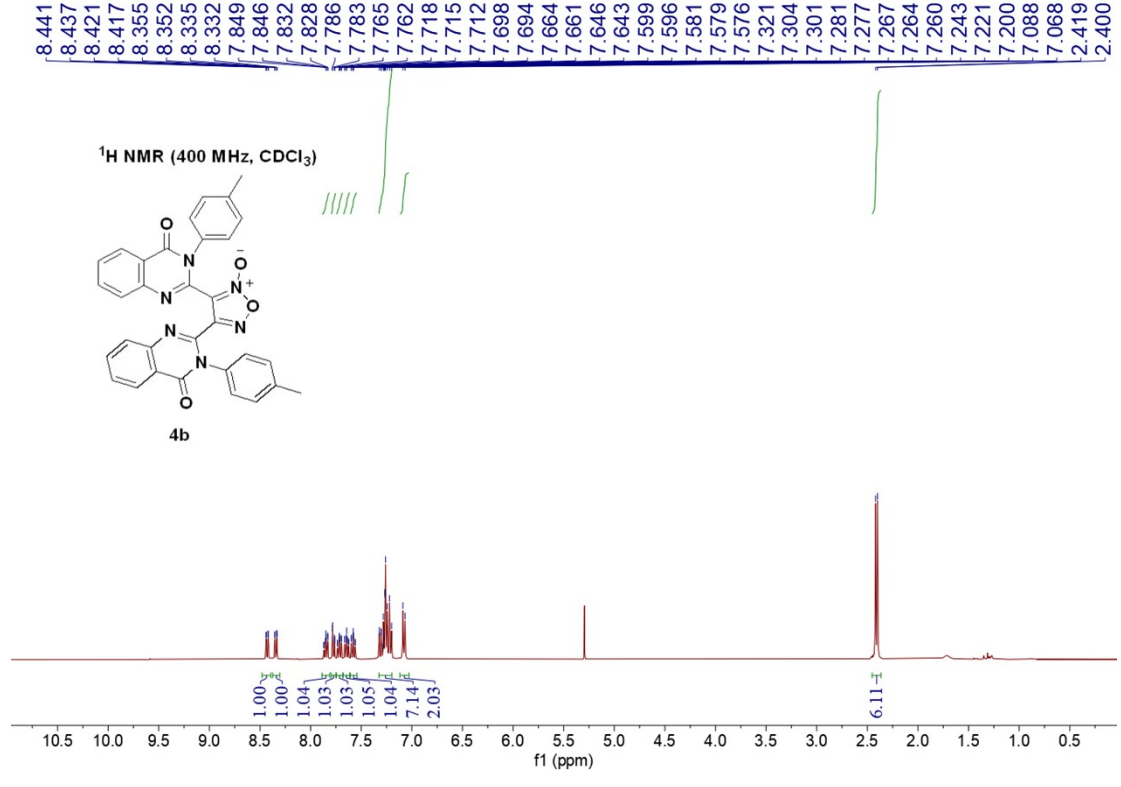

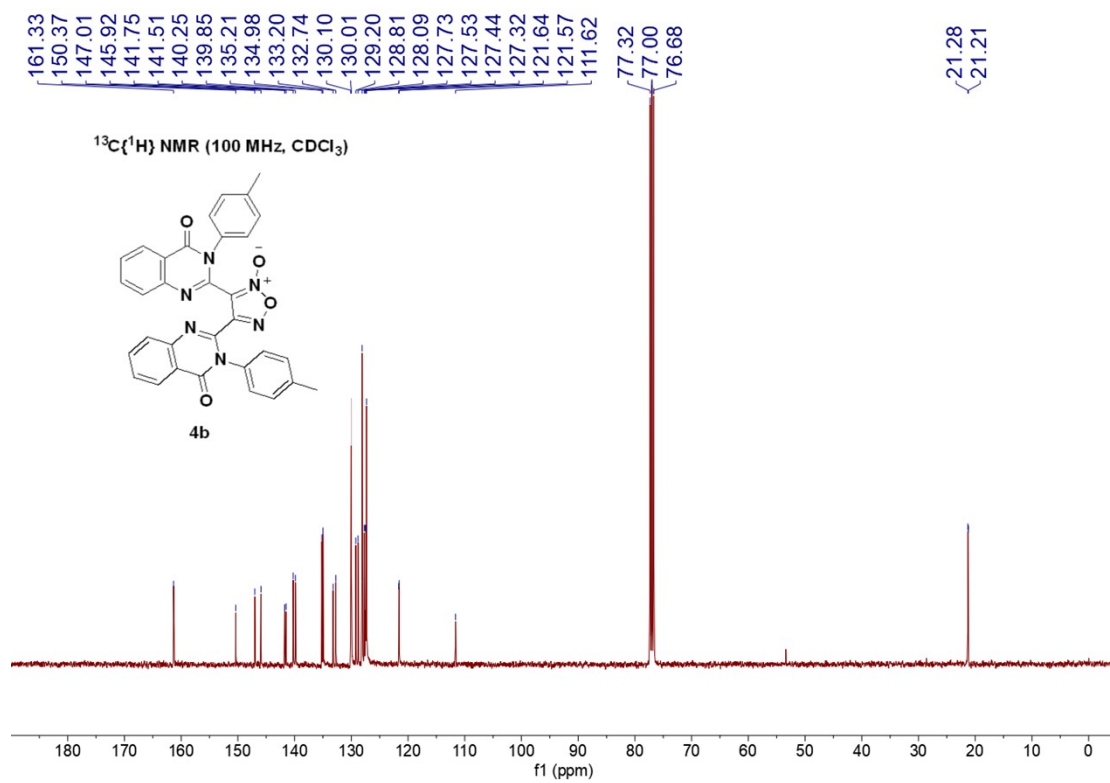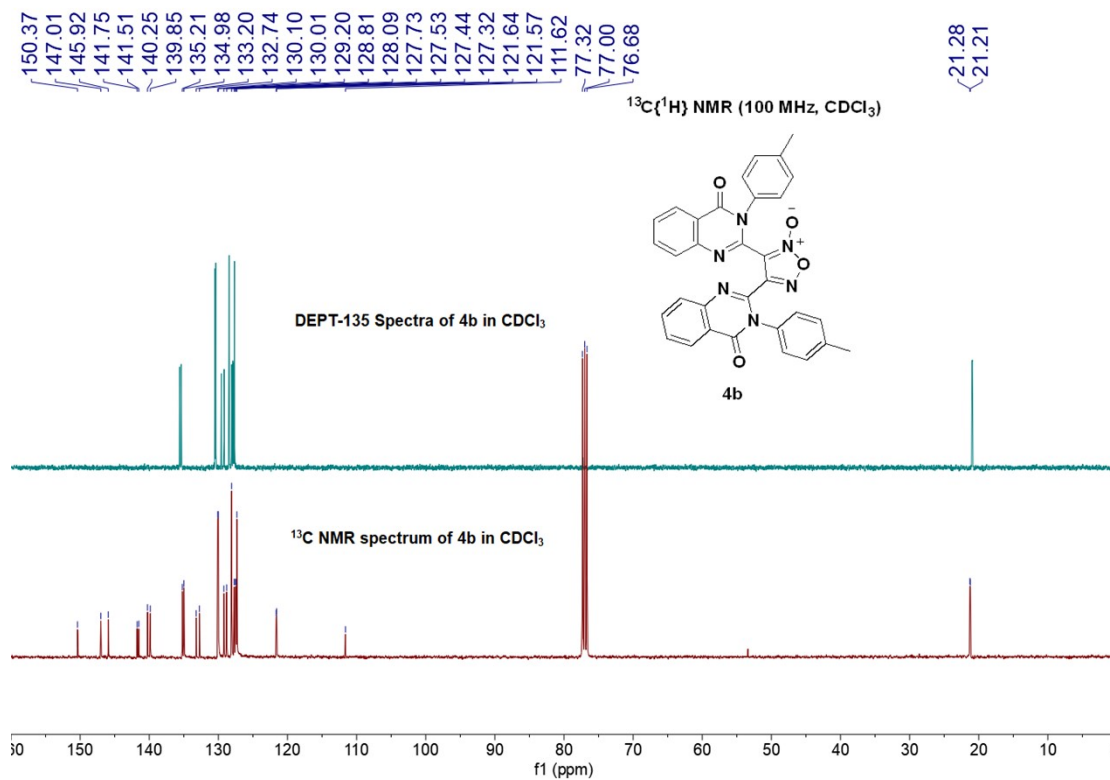



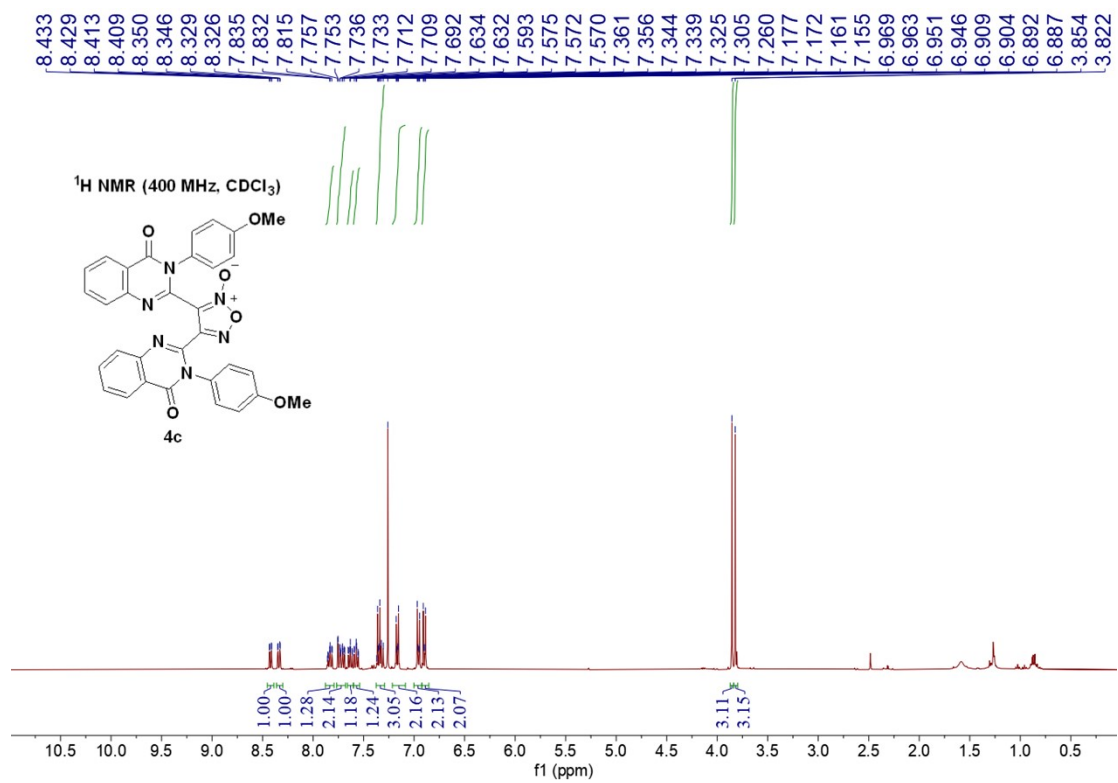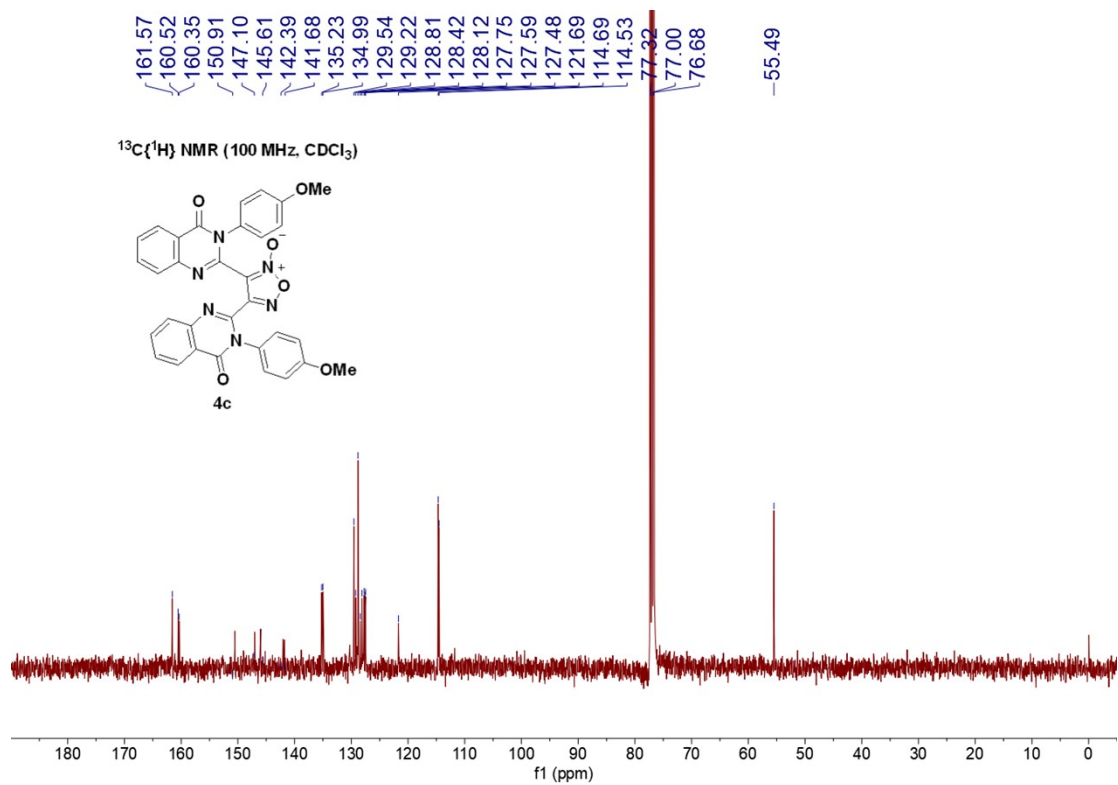



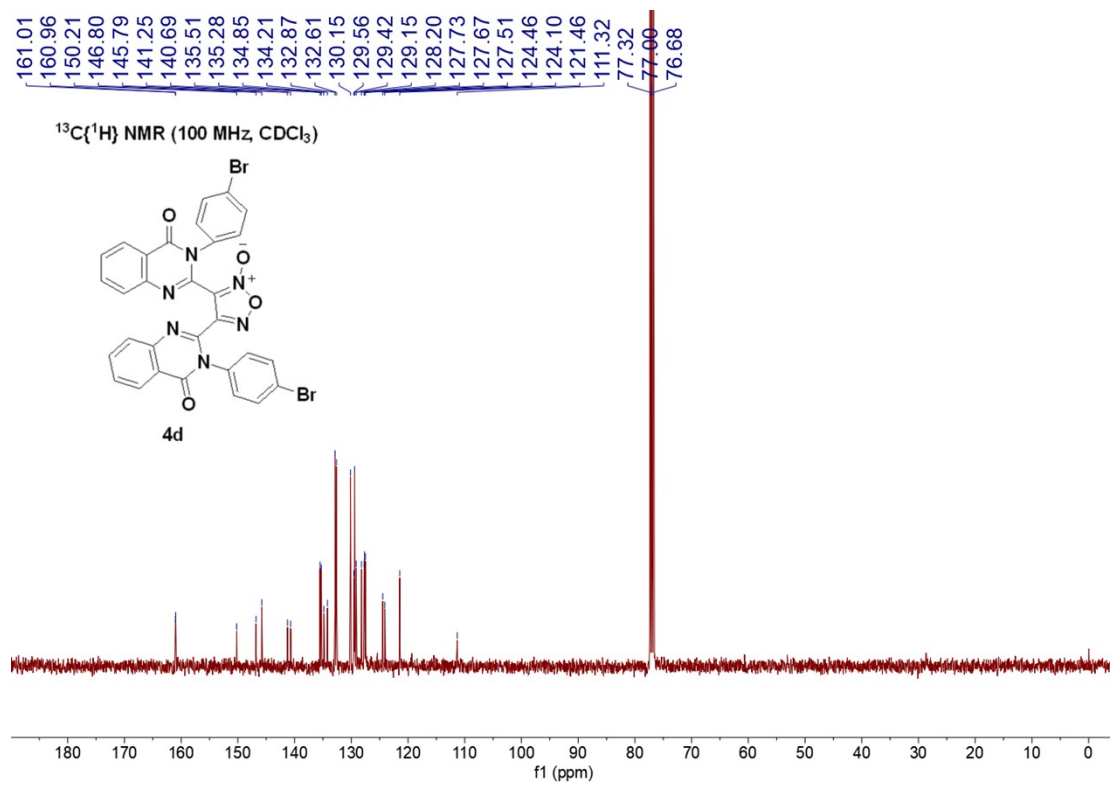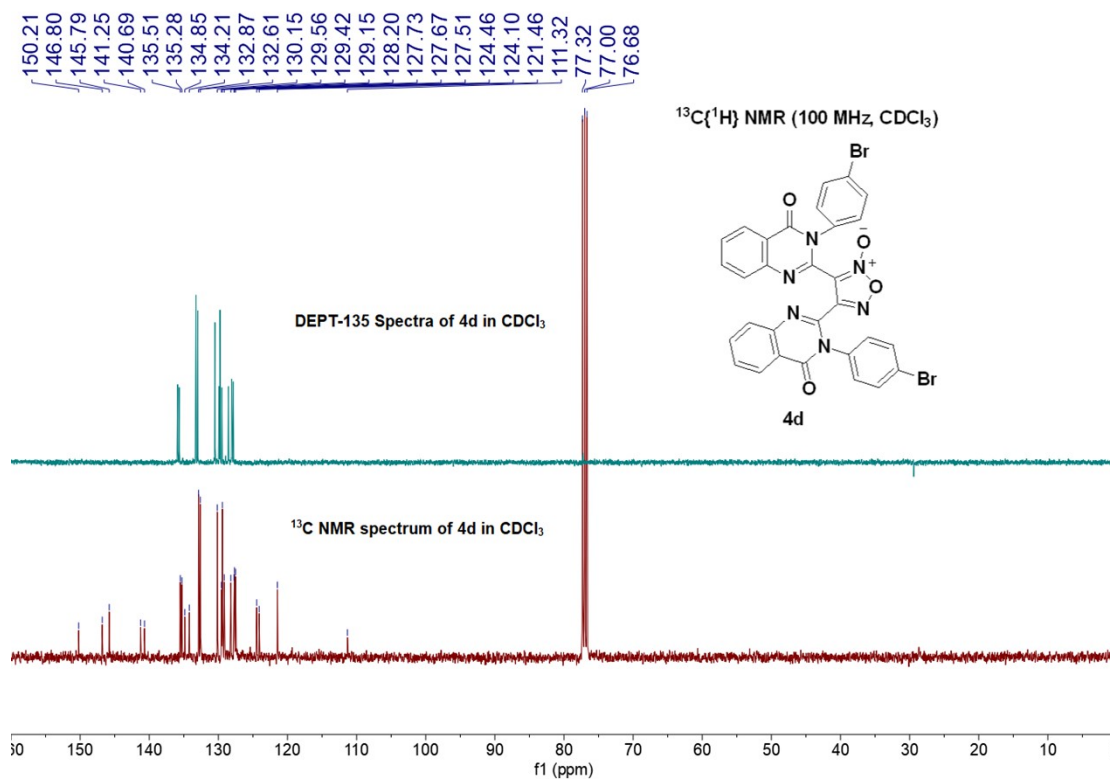

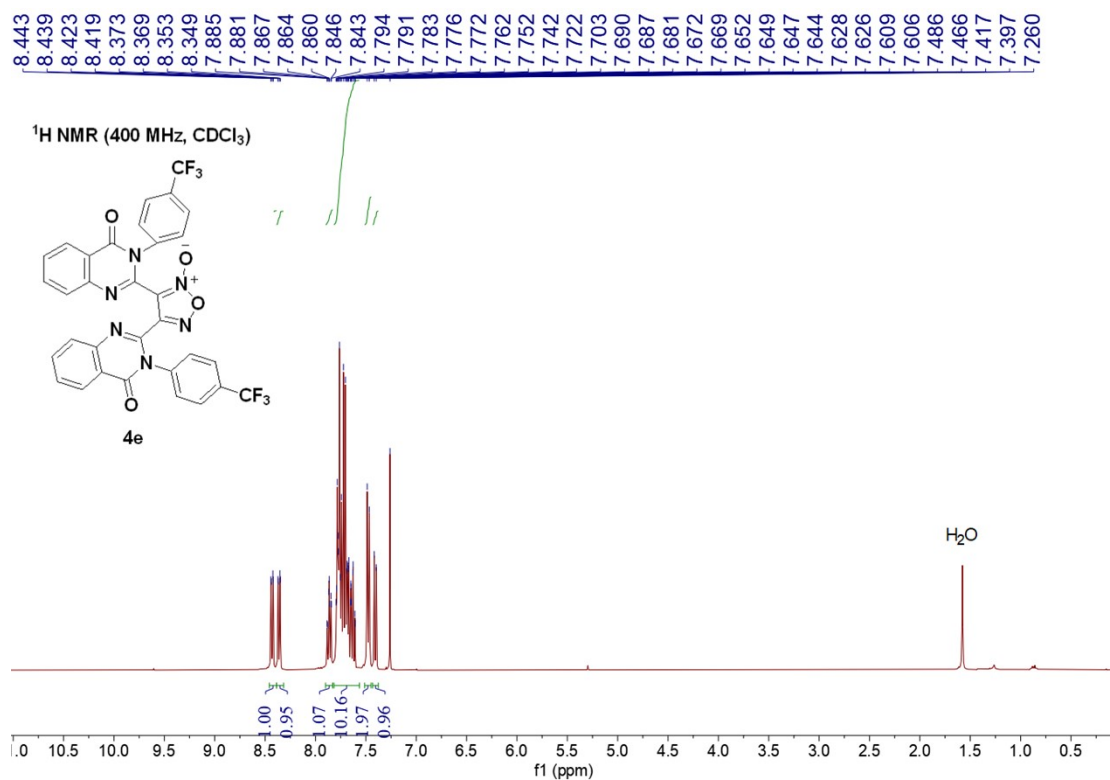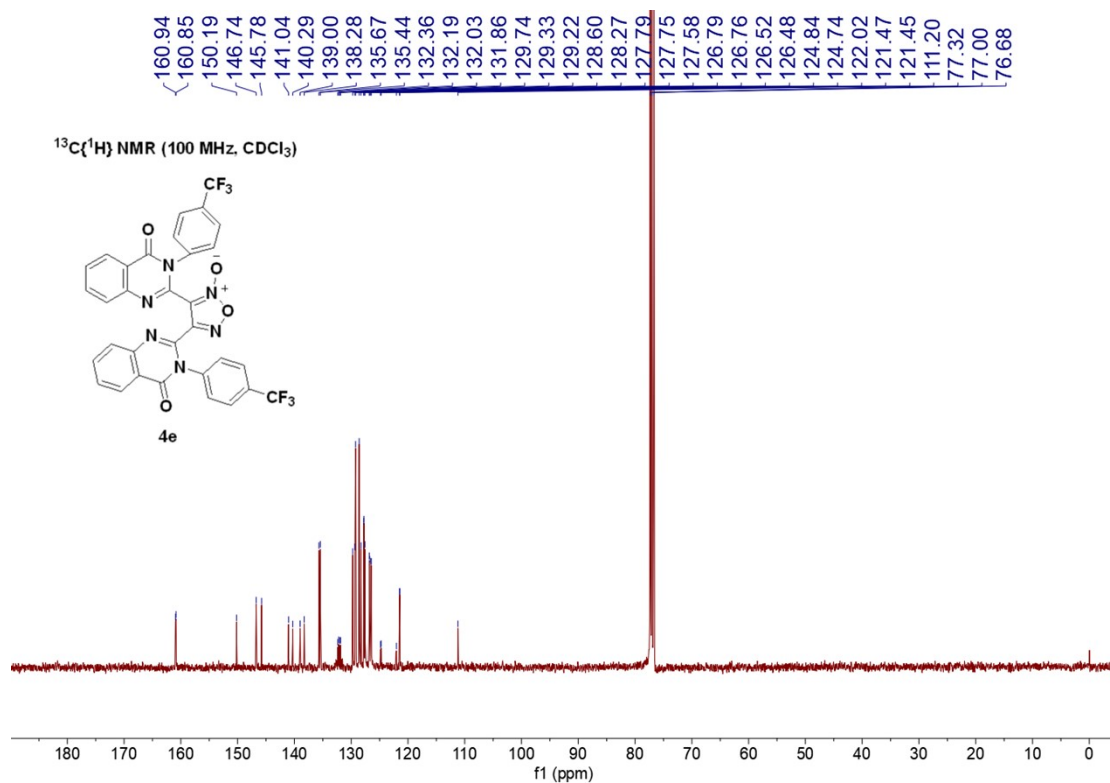

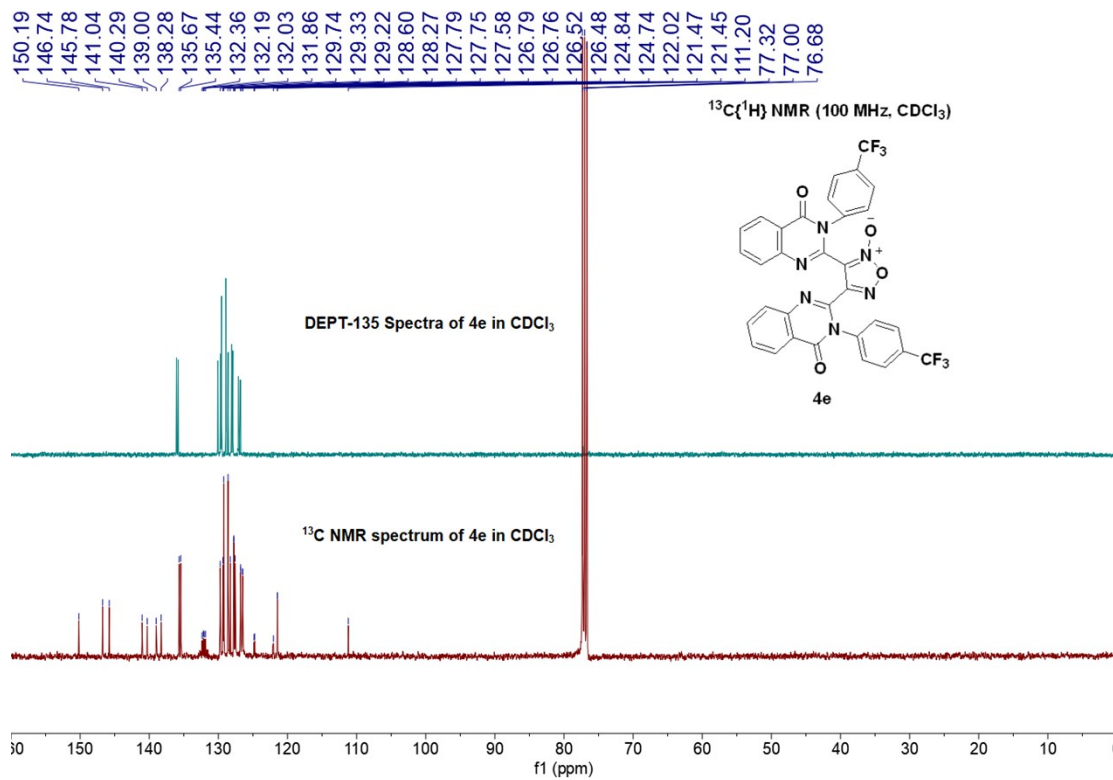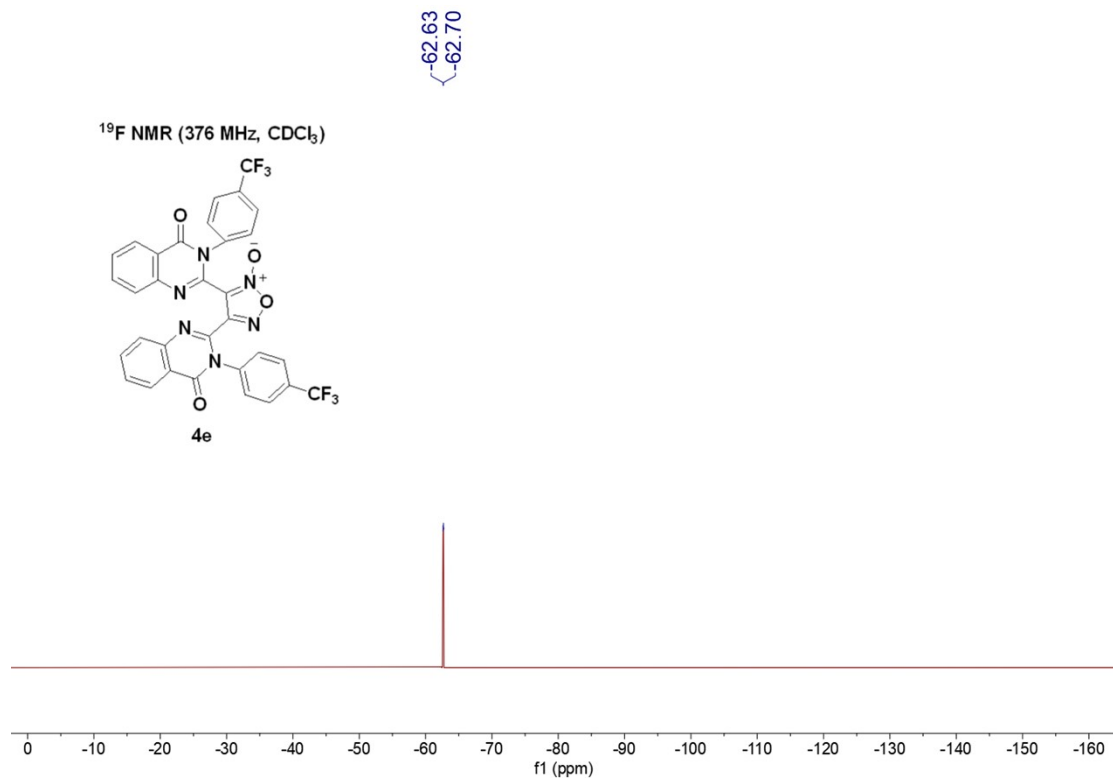

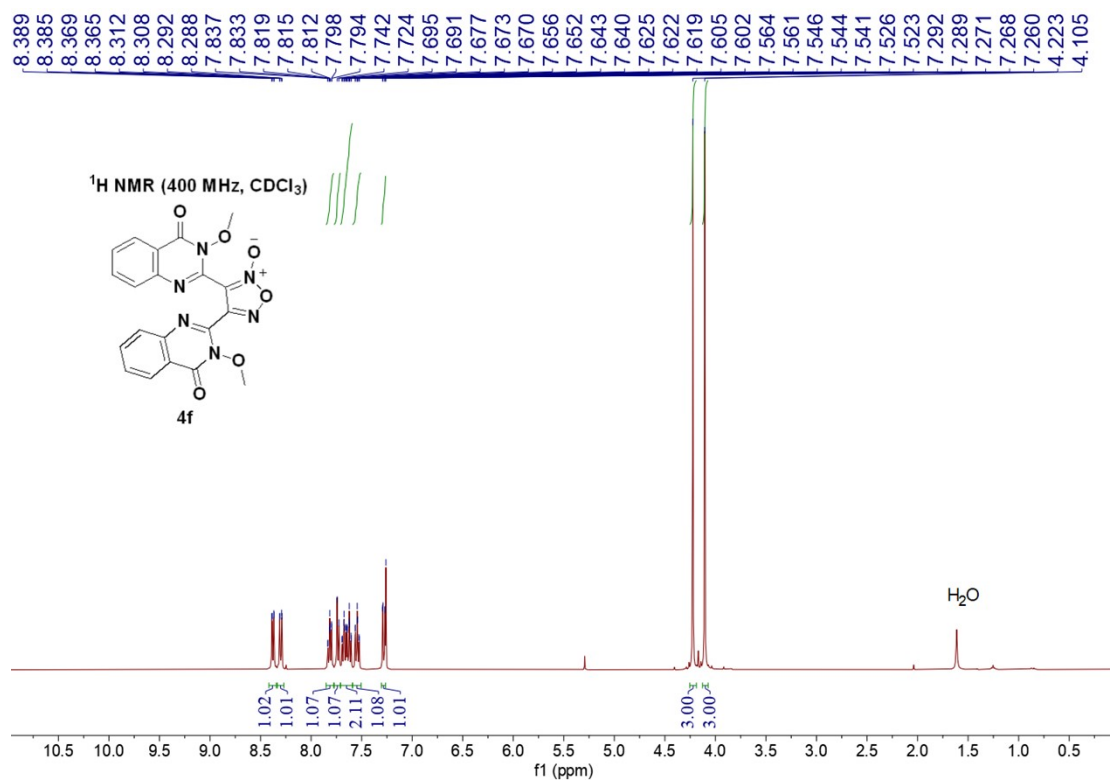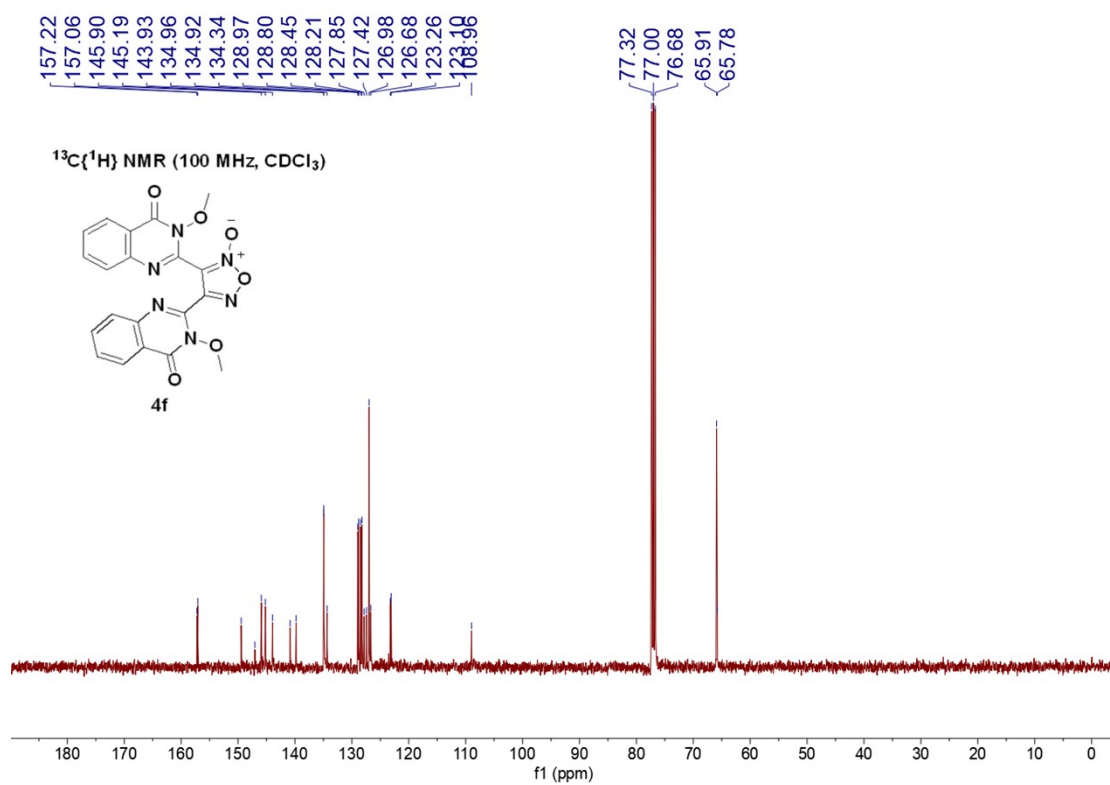

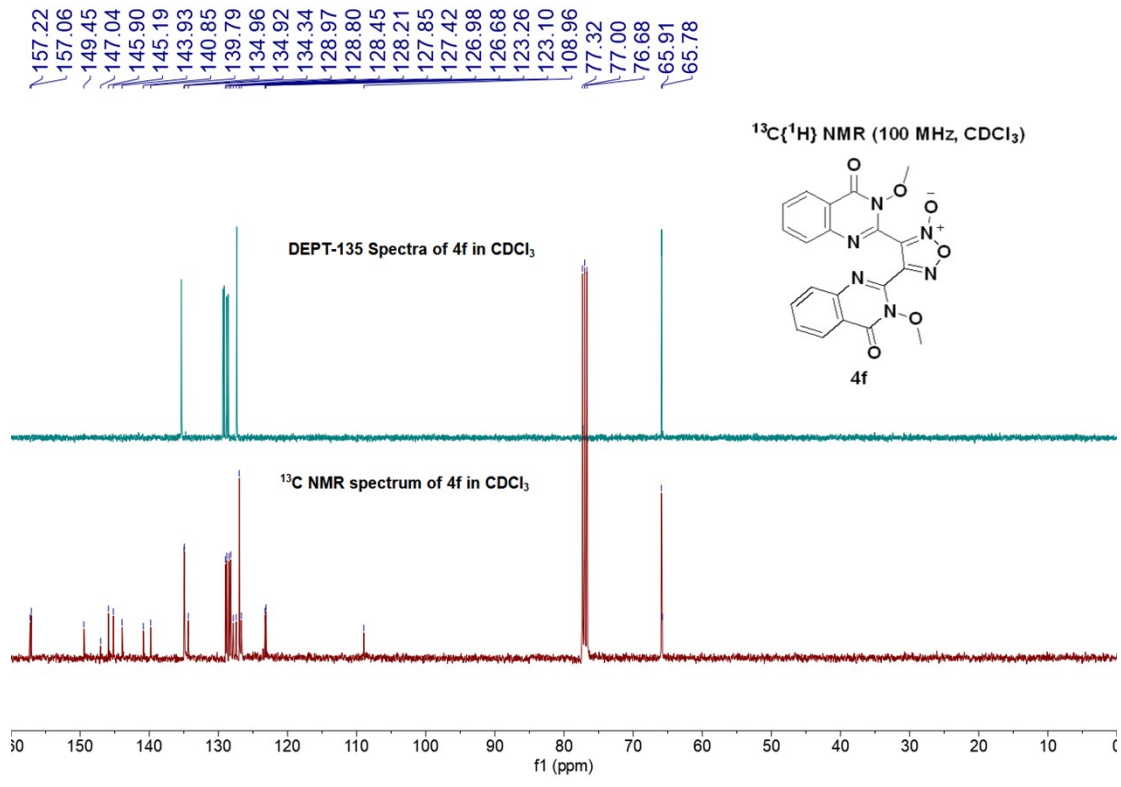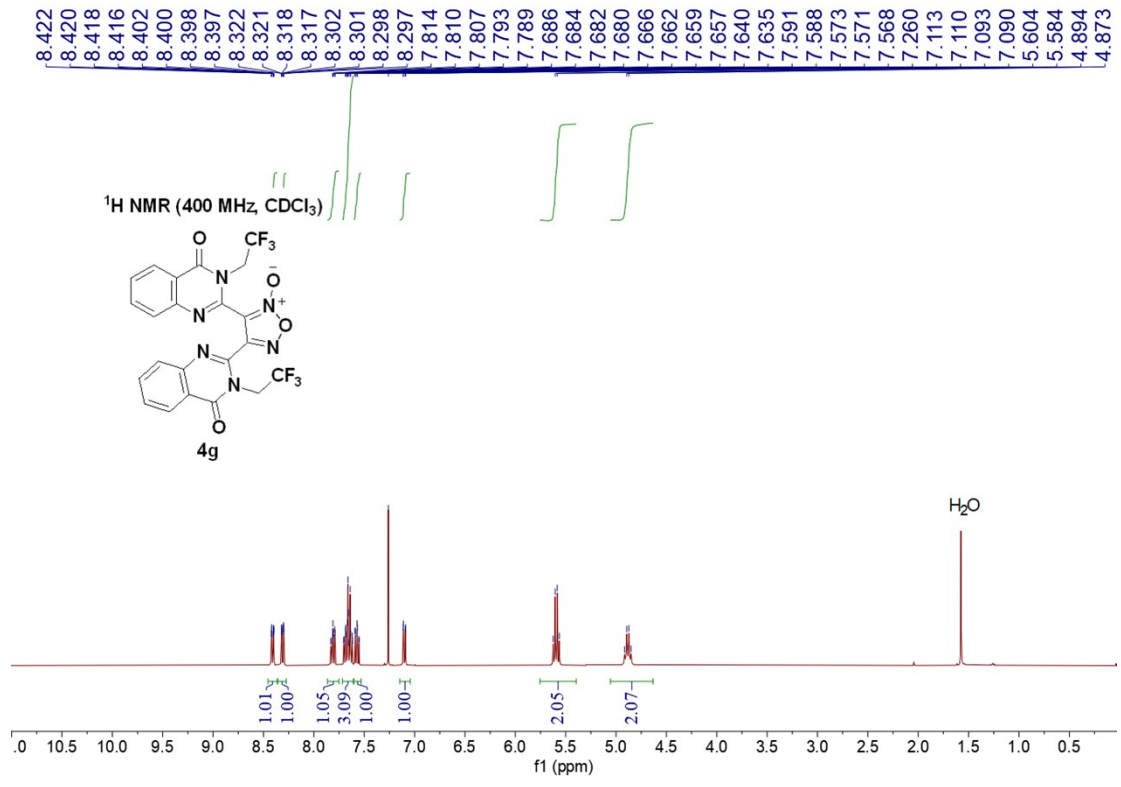



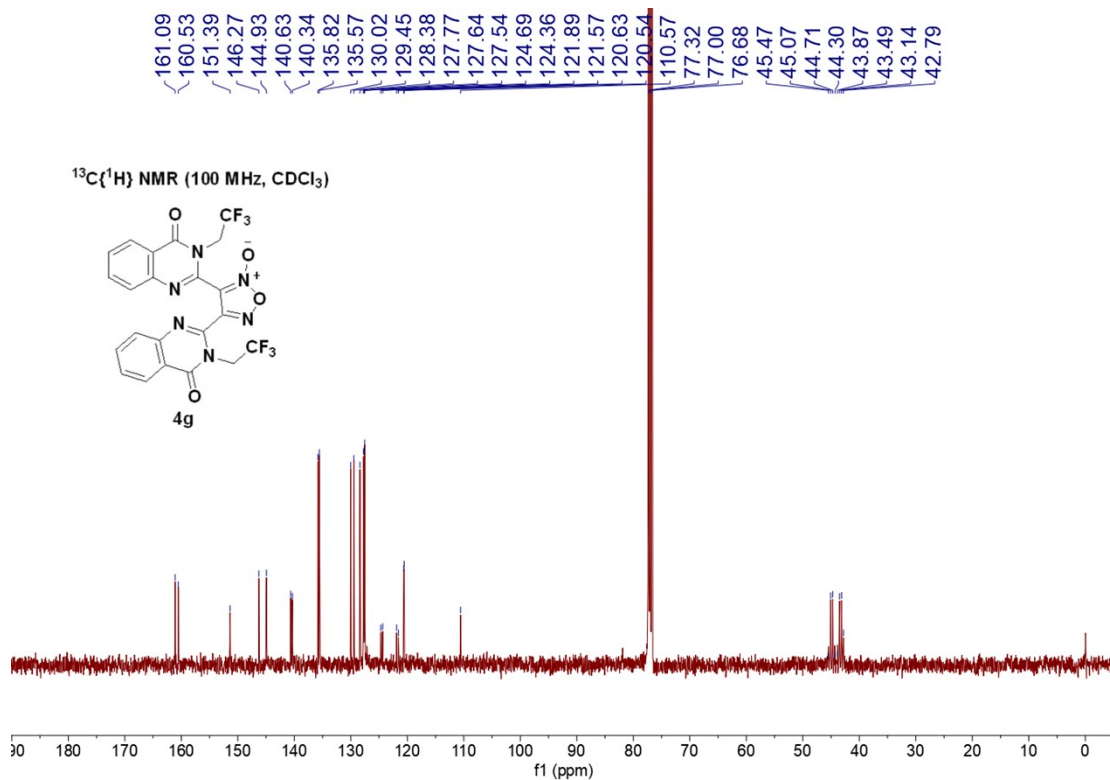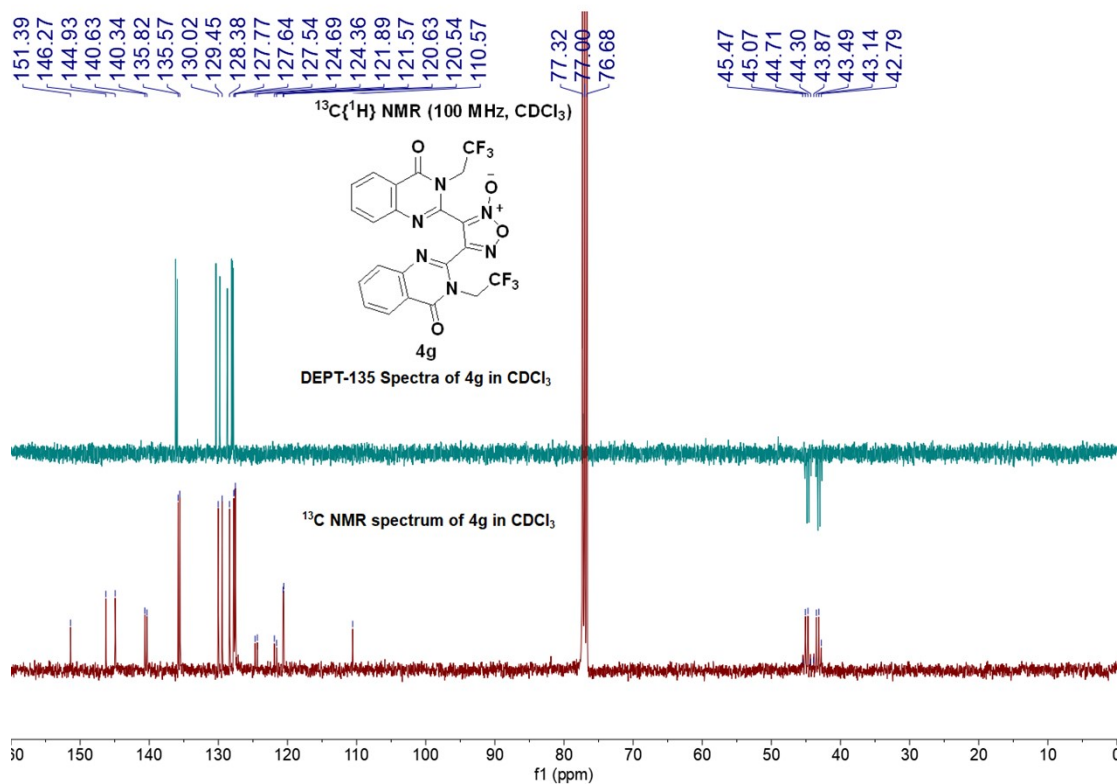



<sup>19</sup>F NMR (376 MHz, CDCl<sub>3</sub>)

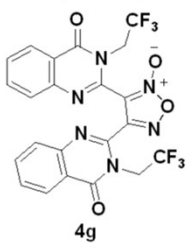

-68.91  
-69.02

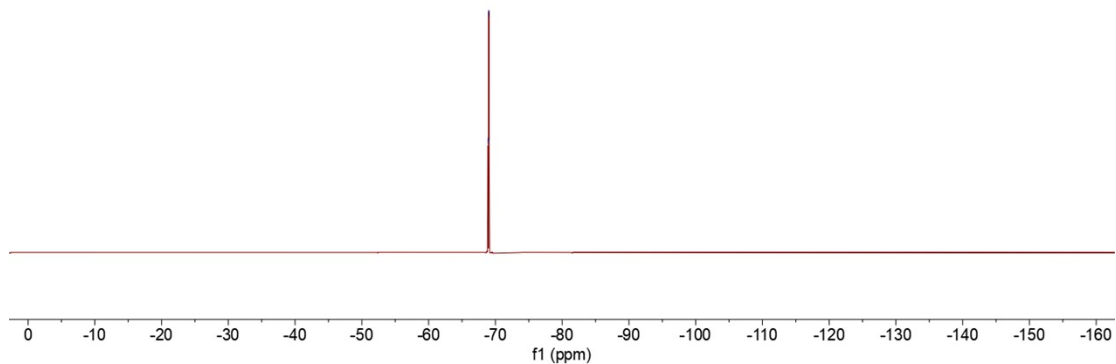

8.319  
8.315  
8.299  
8.293  
8.288  
8.272  
8.268  
7.690  
7.687  
7.672  
7.669  
7.666  
7.655  
7.652  
7.648  
7.637  
7.634  
7.631  
7.617  
7.613  
7.534  
7.531  
7.519  
7.516  
7.511  
7.501  
7.496  
7.493  
7.481  
7.478  
7.460  
7.440  
7.296  
7.294  
7.276  
7.273  
7.260  
3.476  
3.462  
3.448  
3.431  
1.317  
1.289  
1.252  
1.129

<sup>1</sup>H NMR (400 MHz, CDCl<sub>3</sub>)

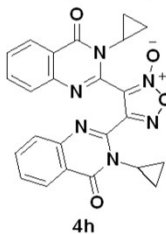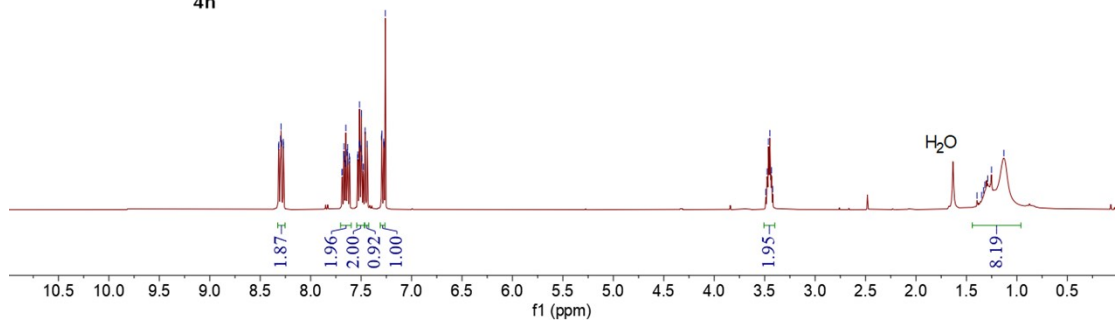

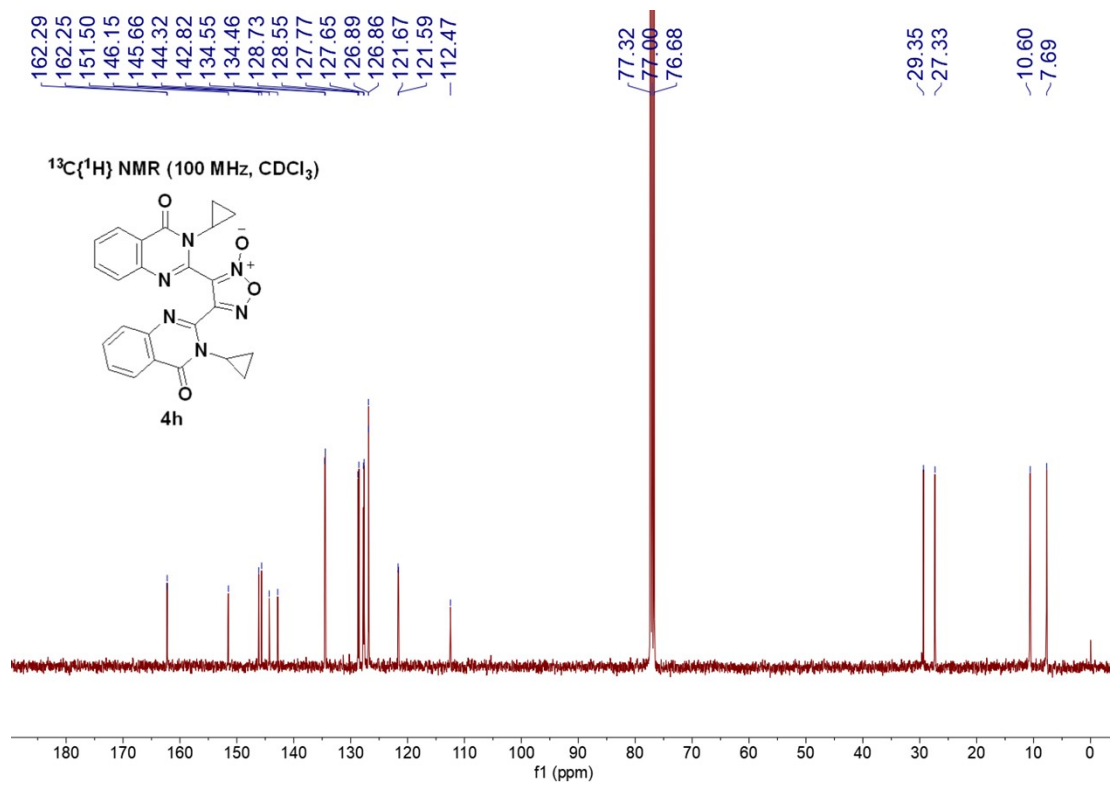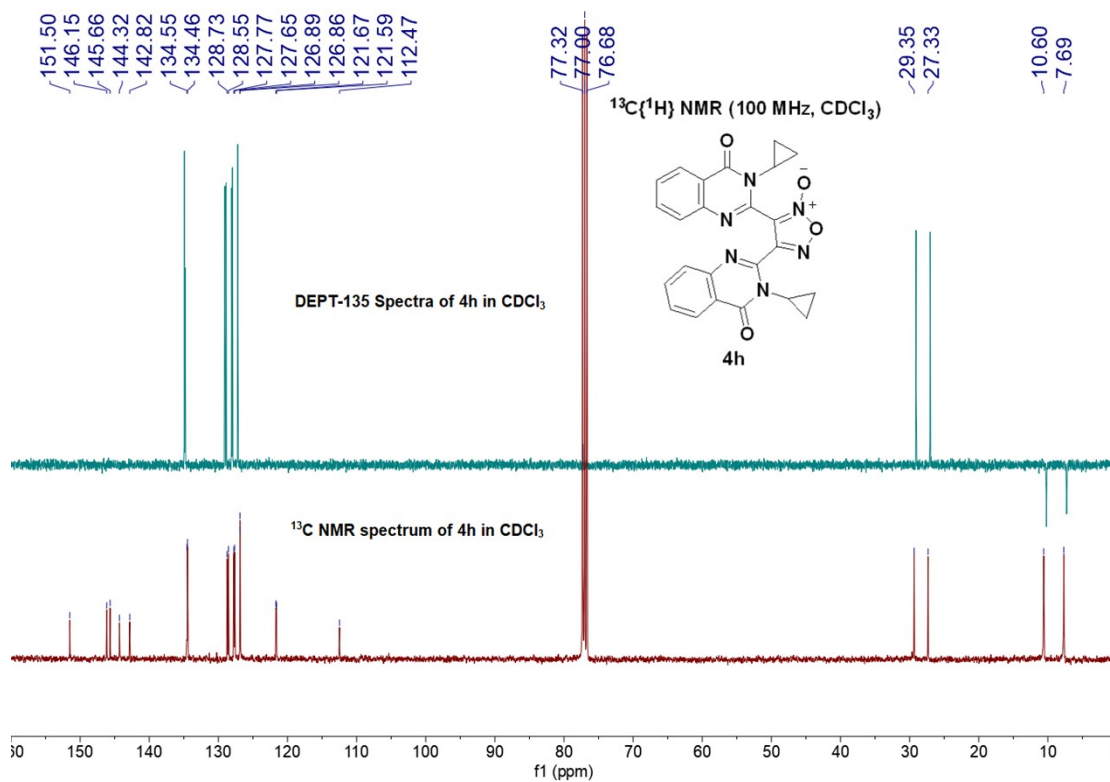

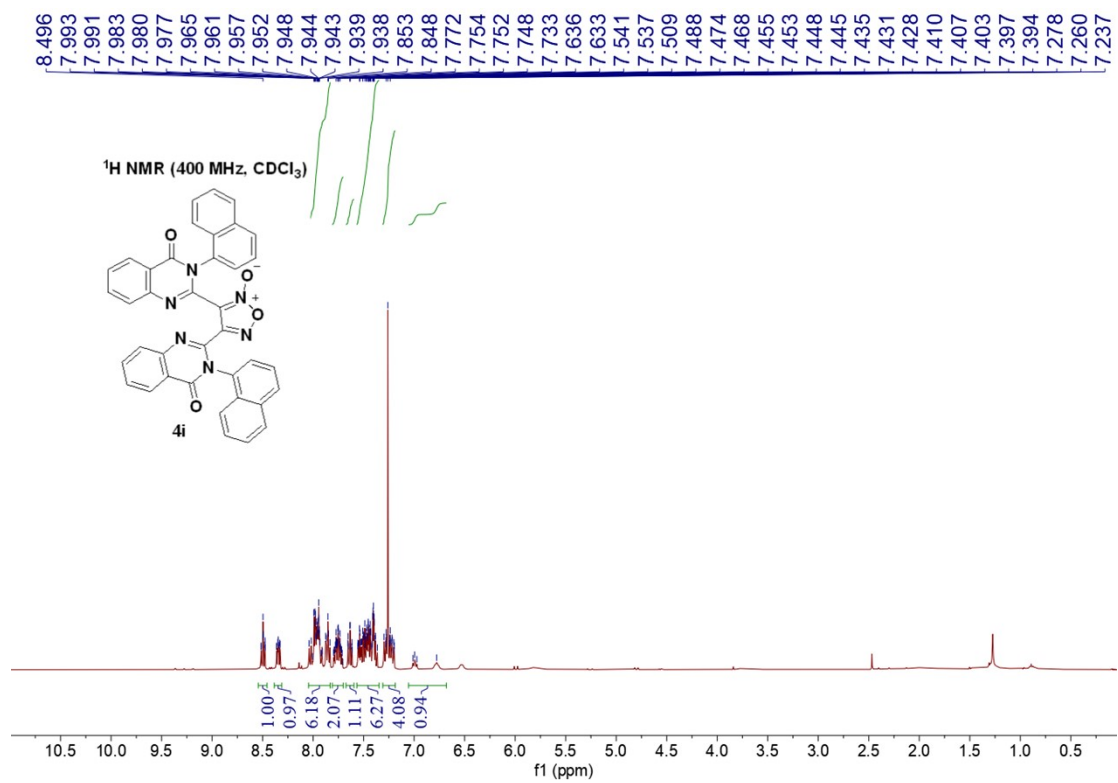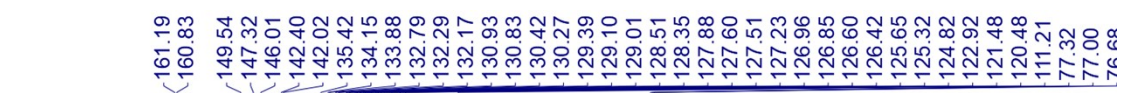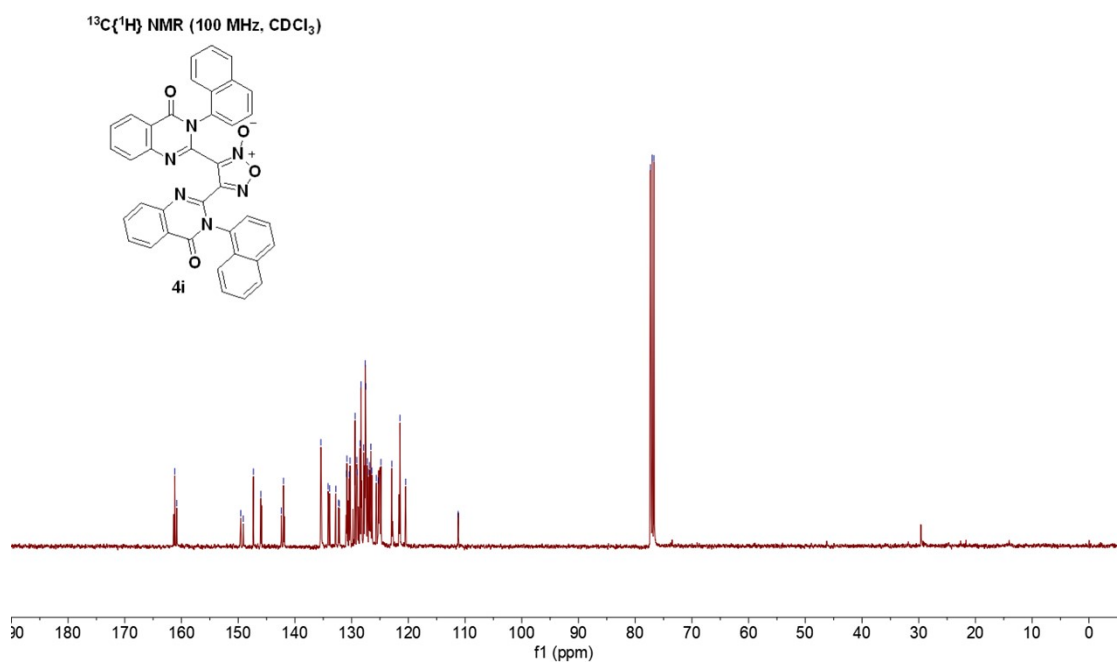

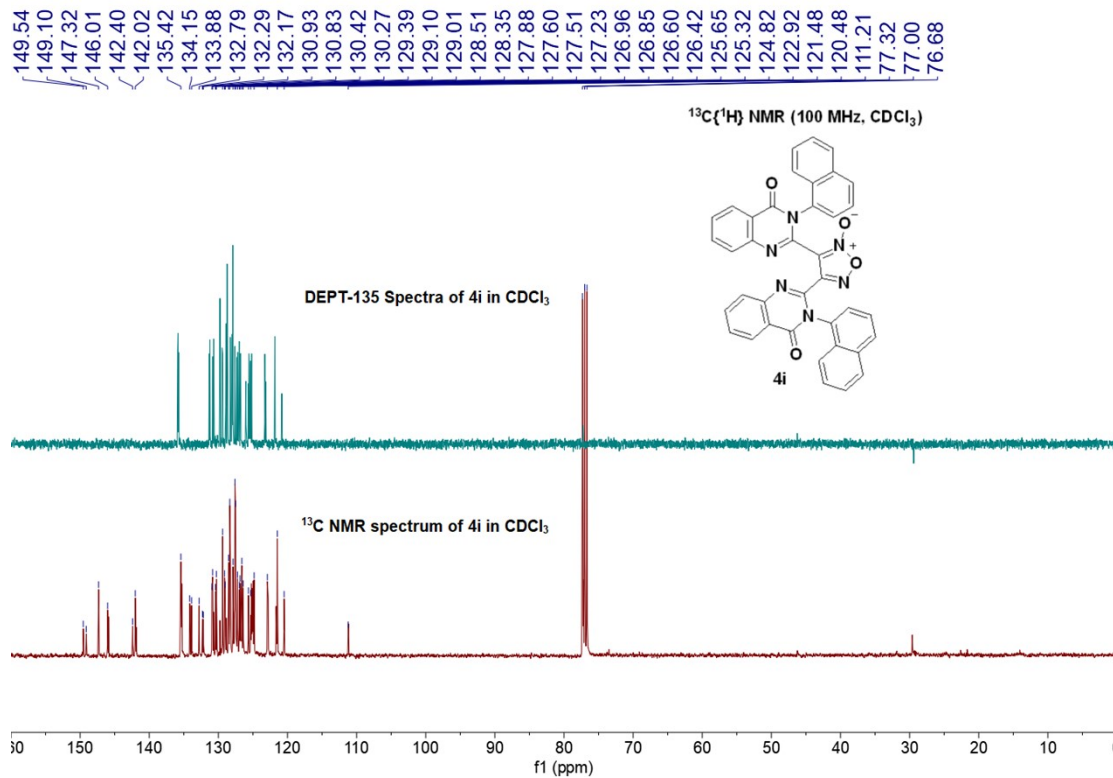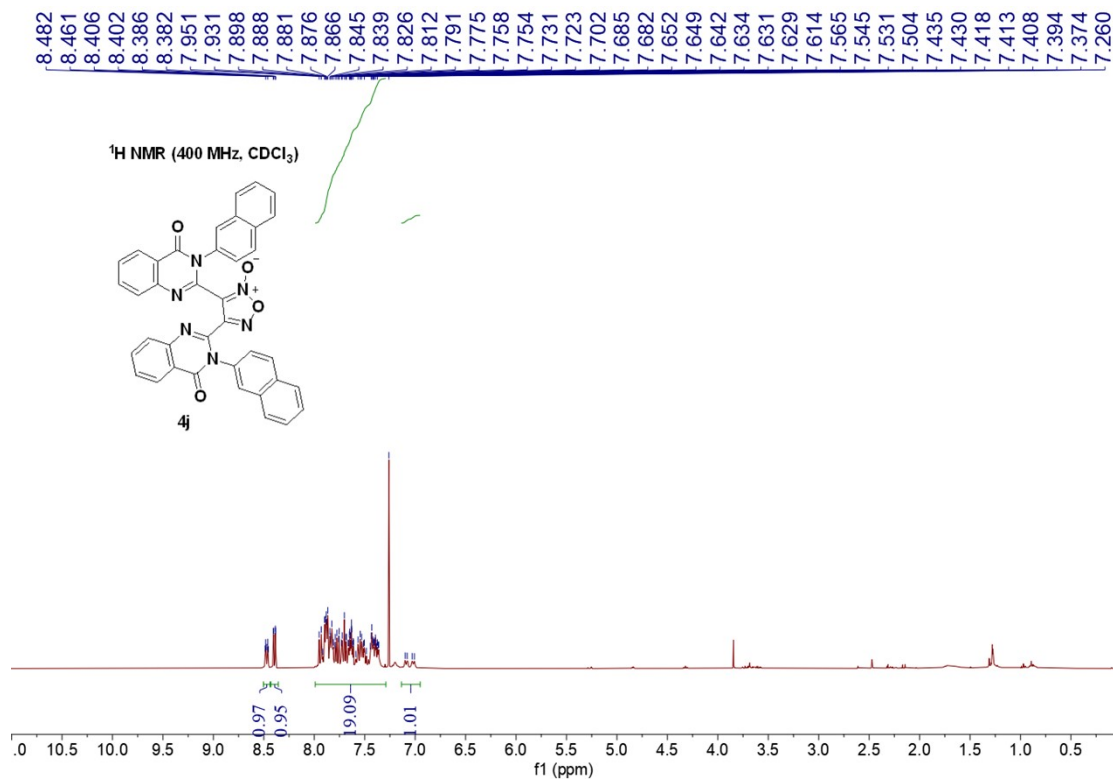

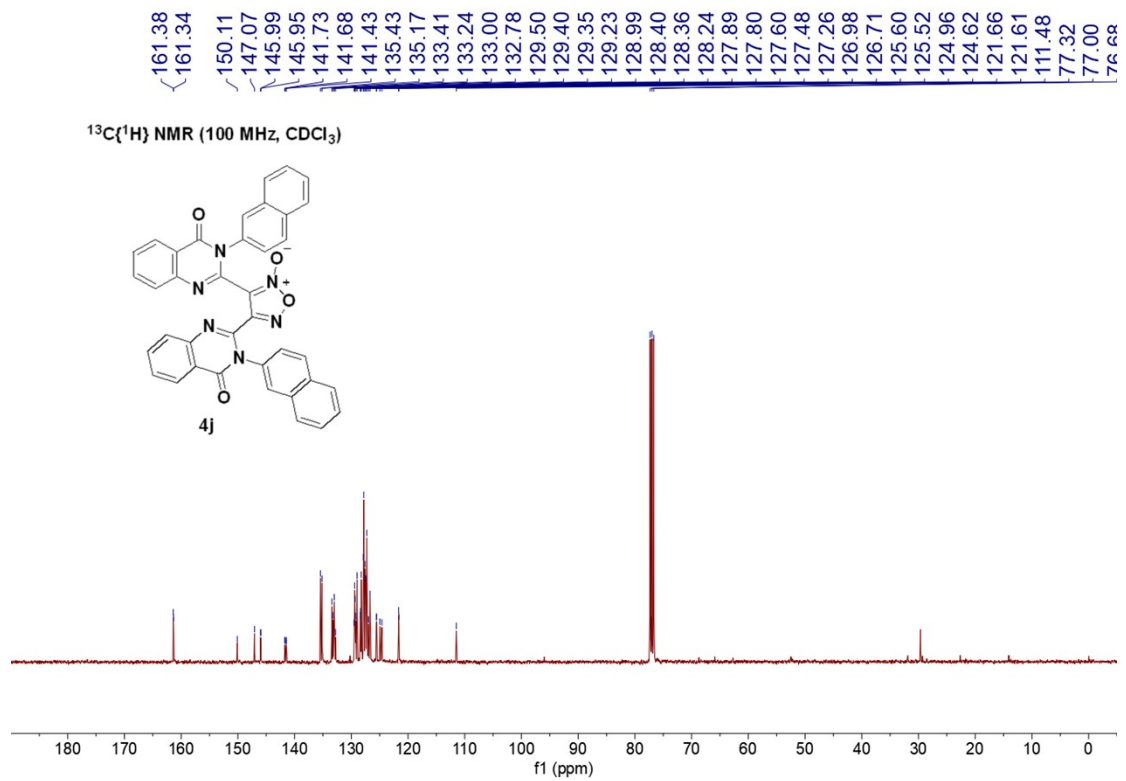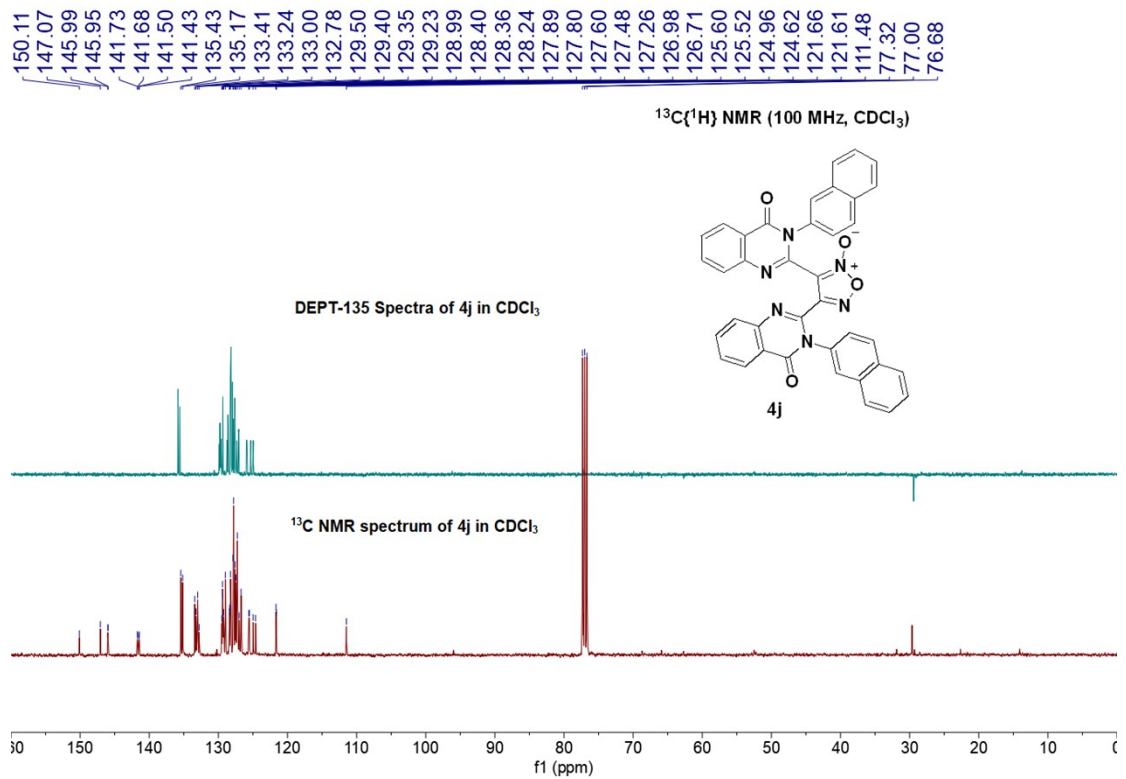

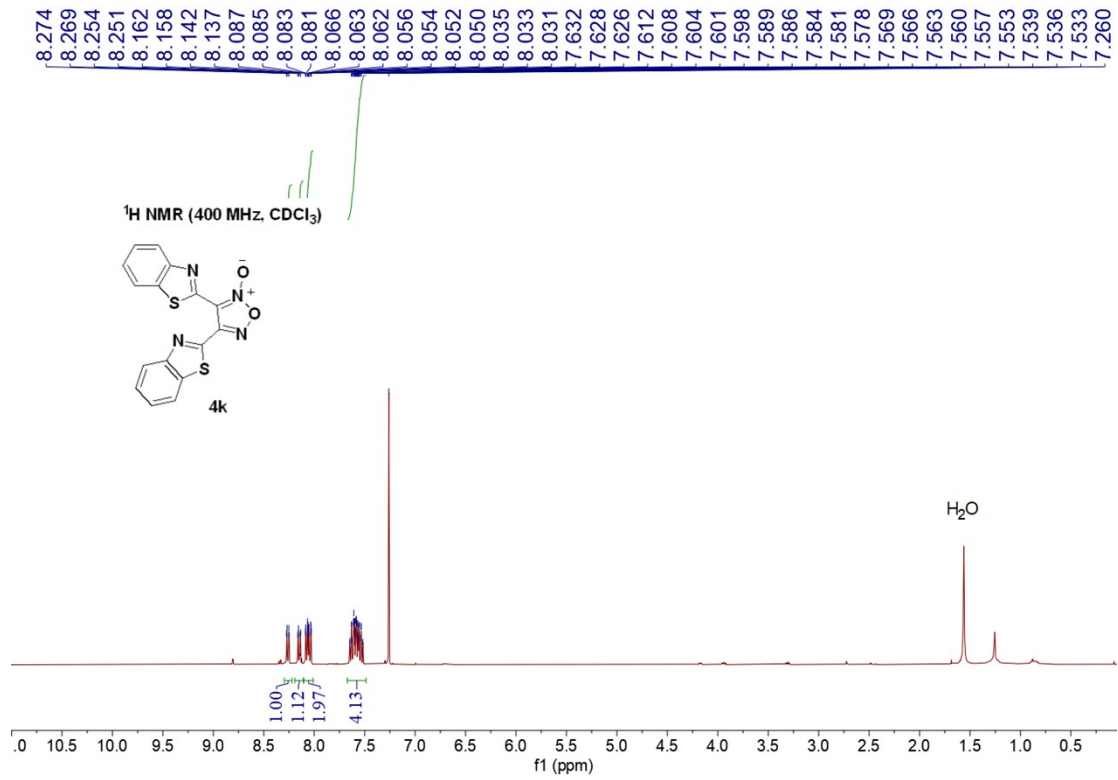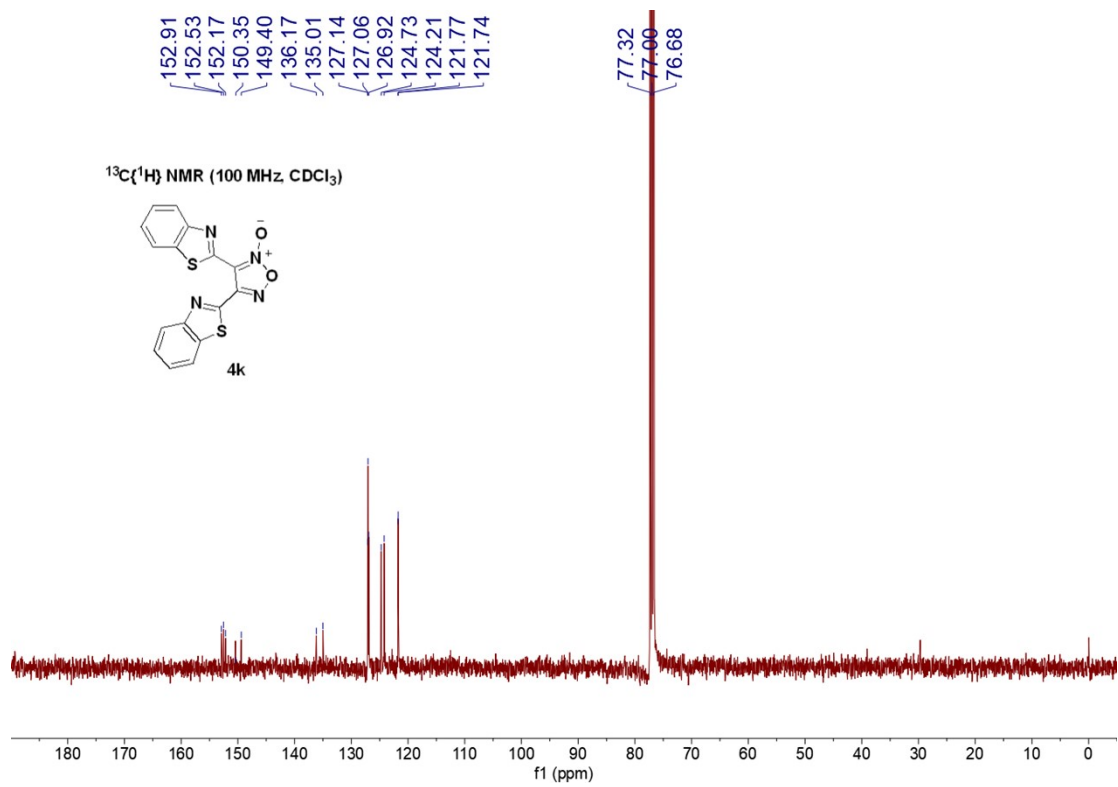

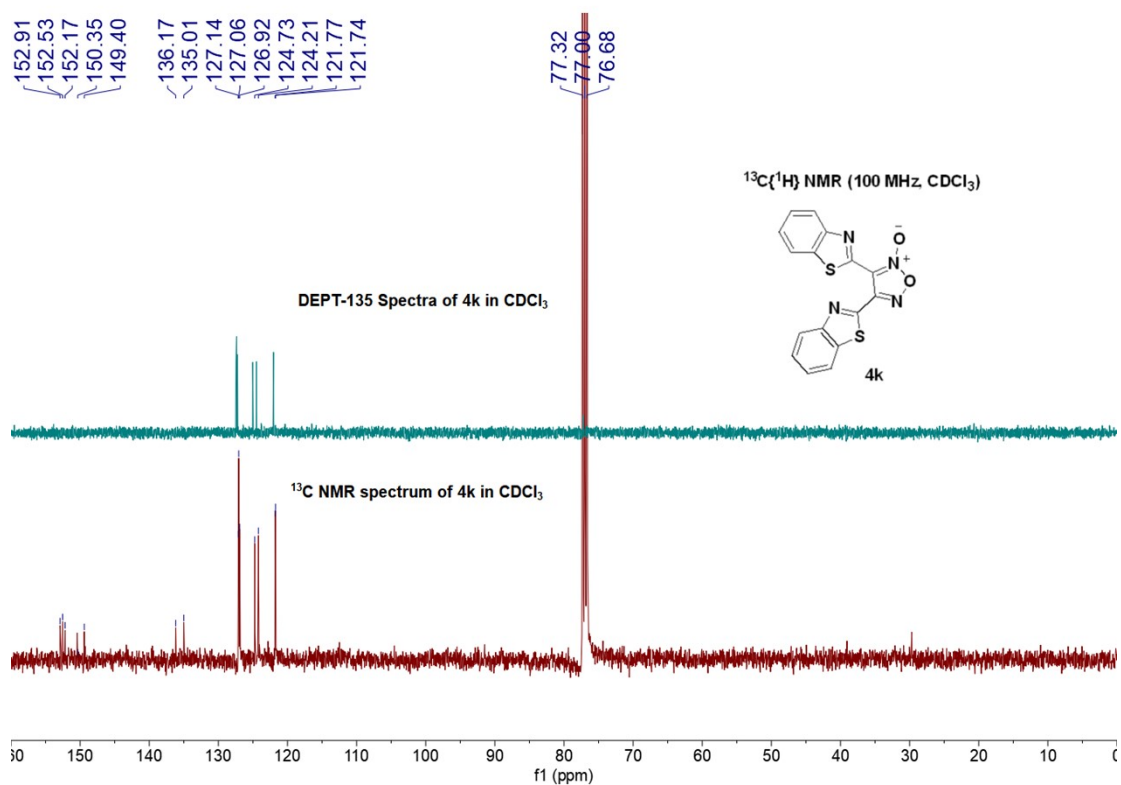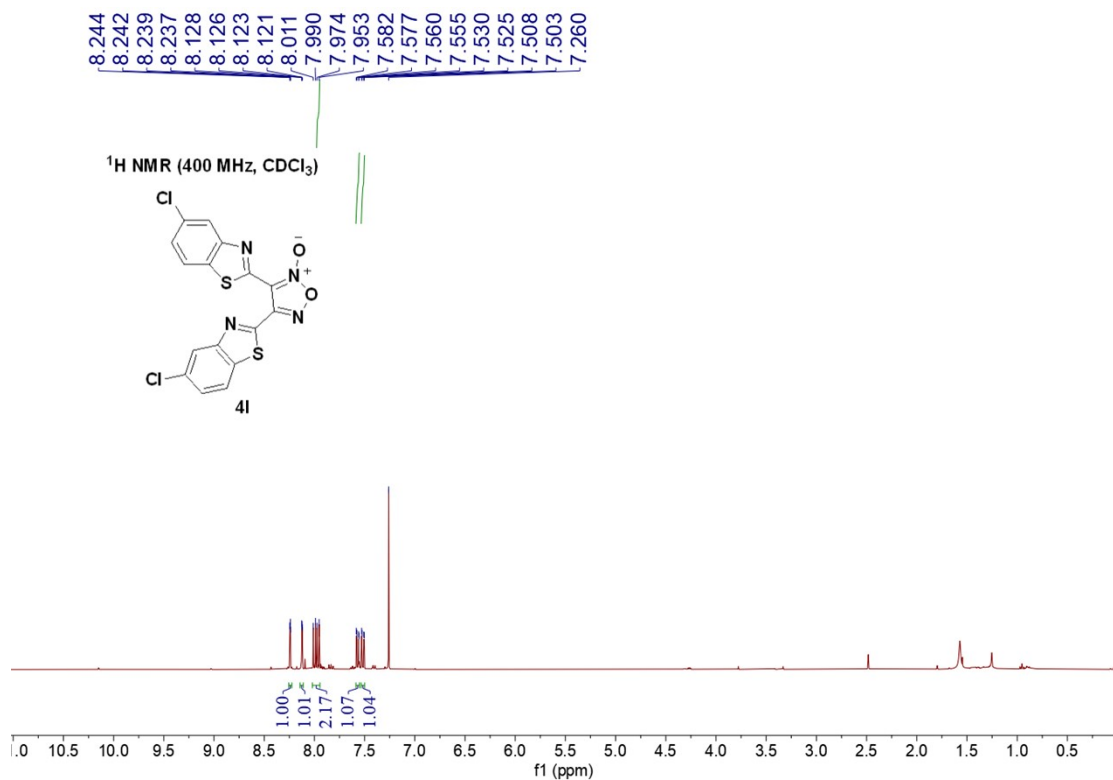



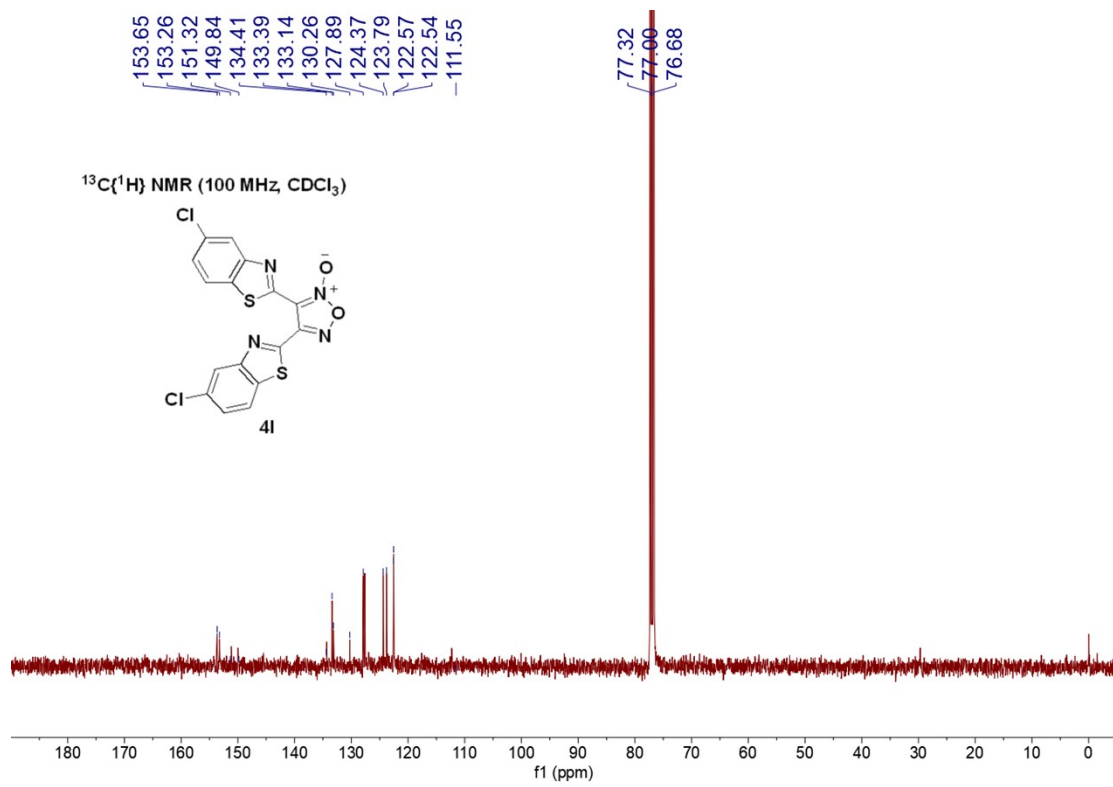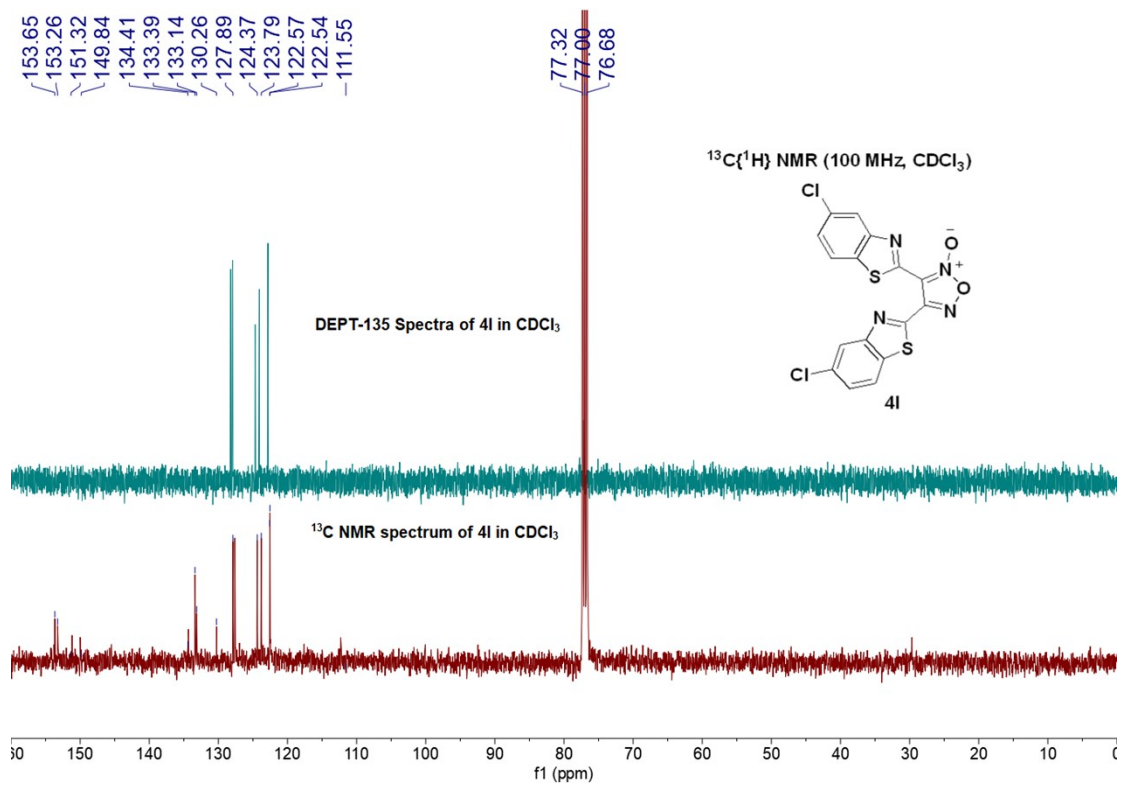



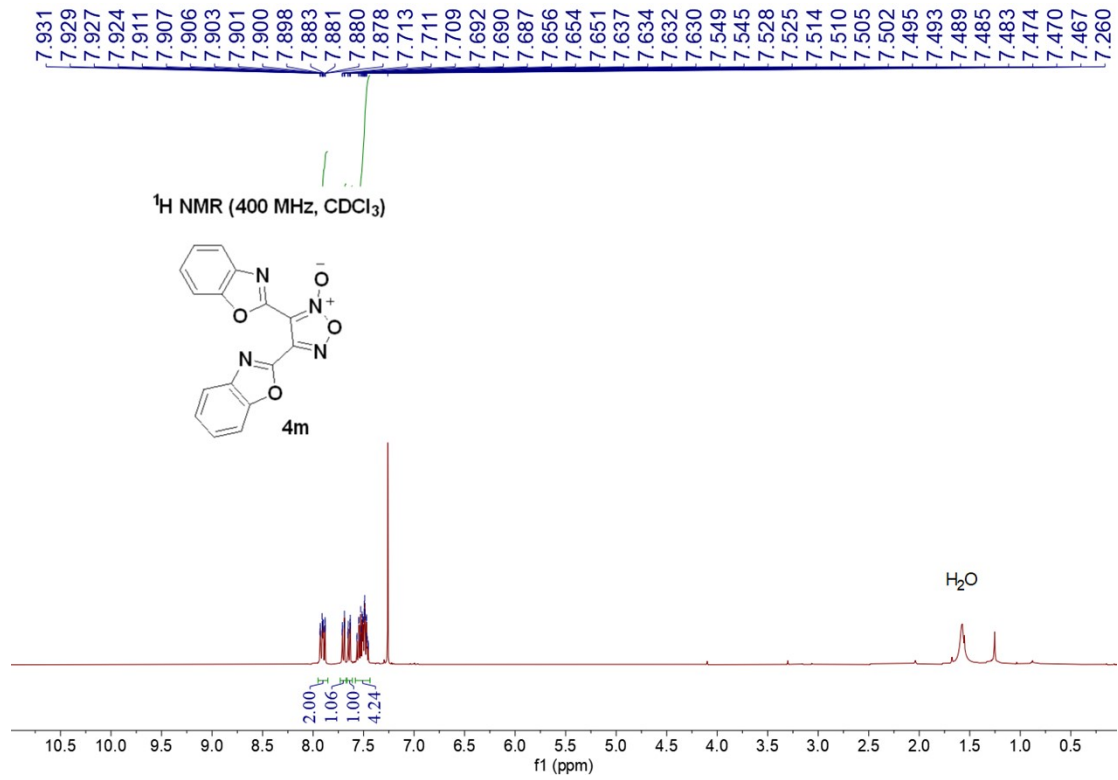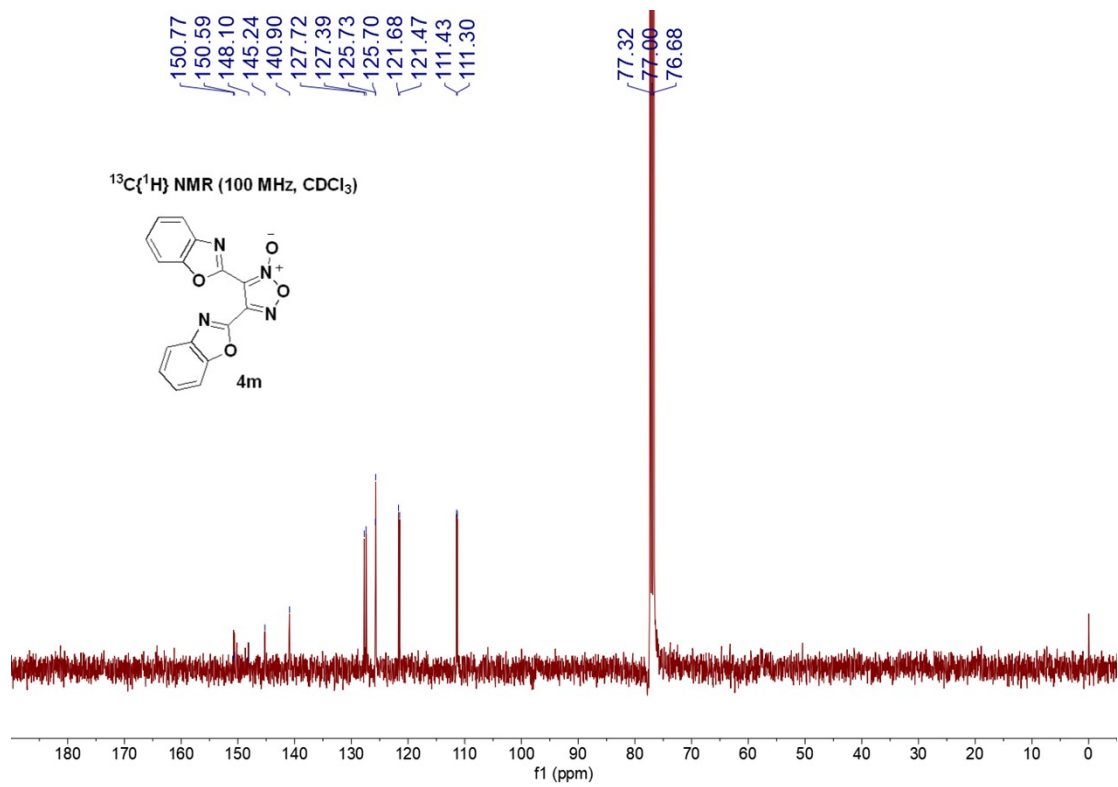

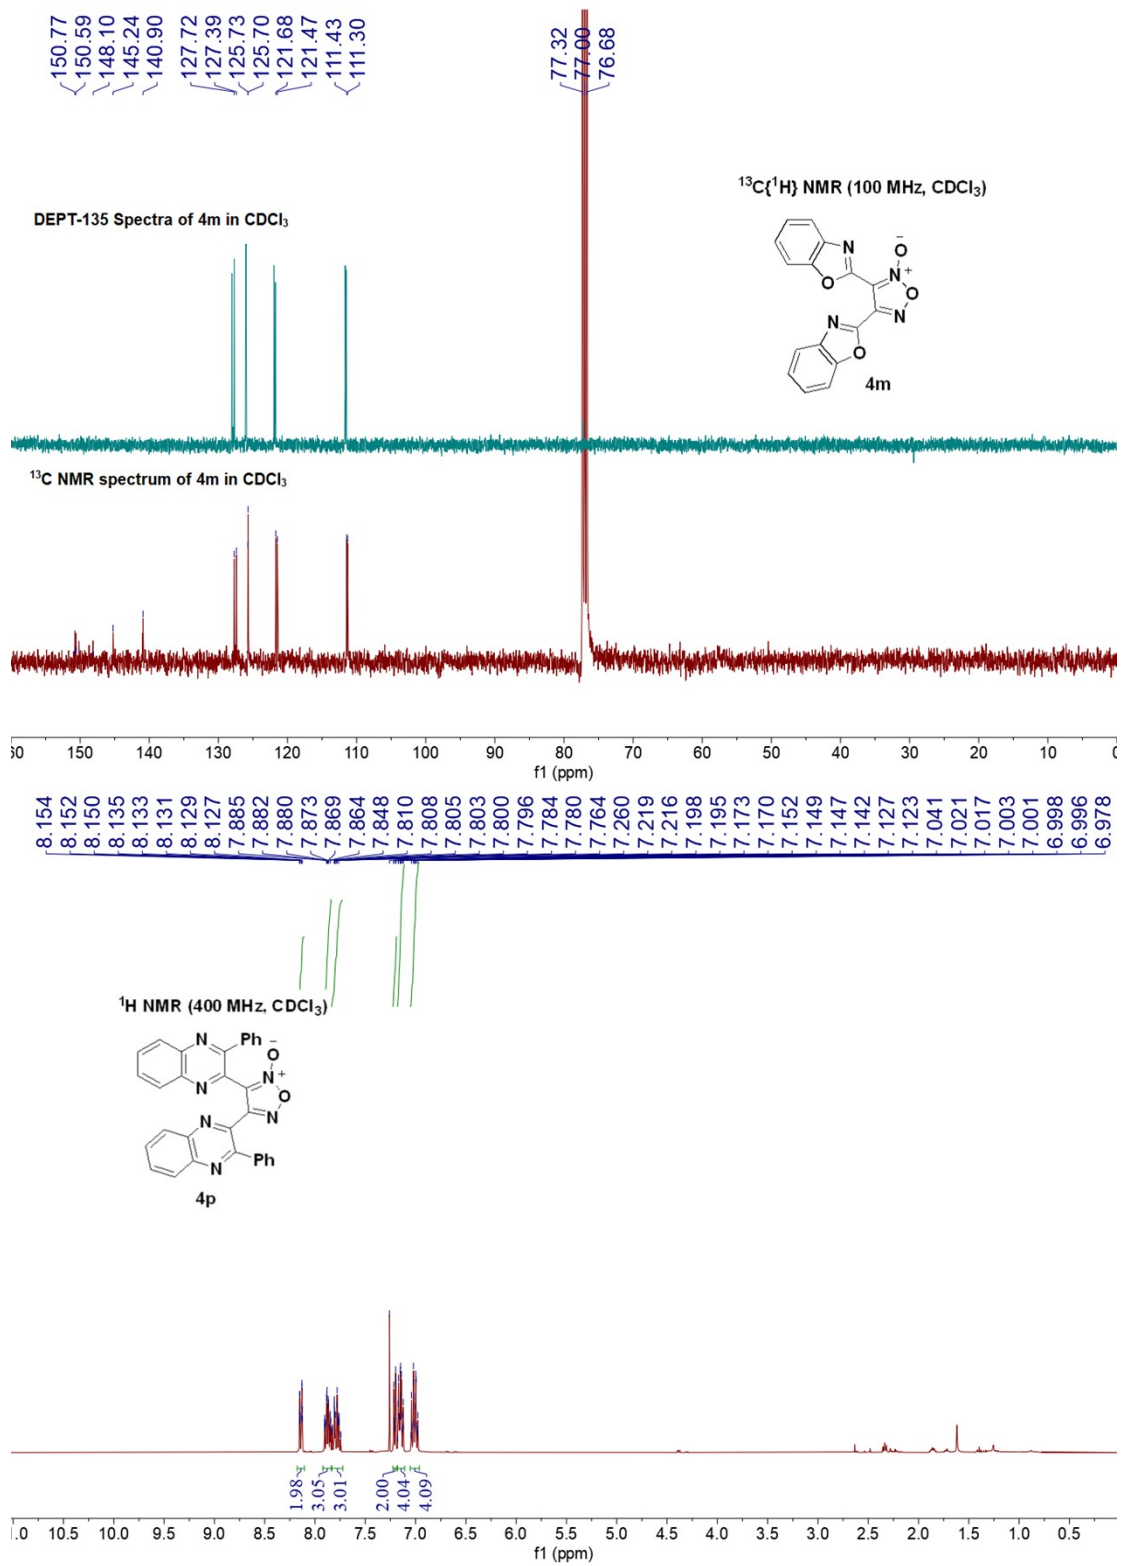

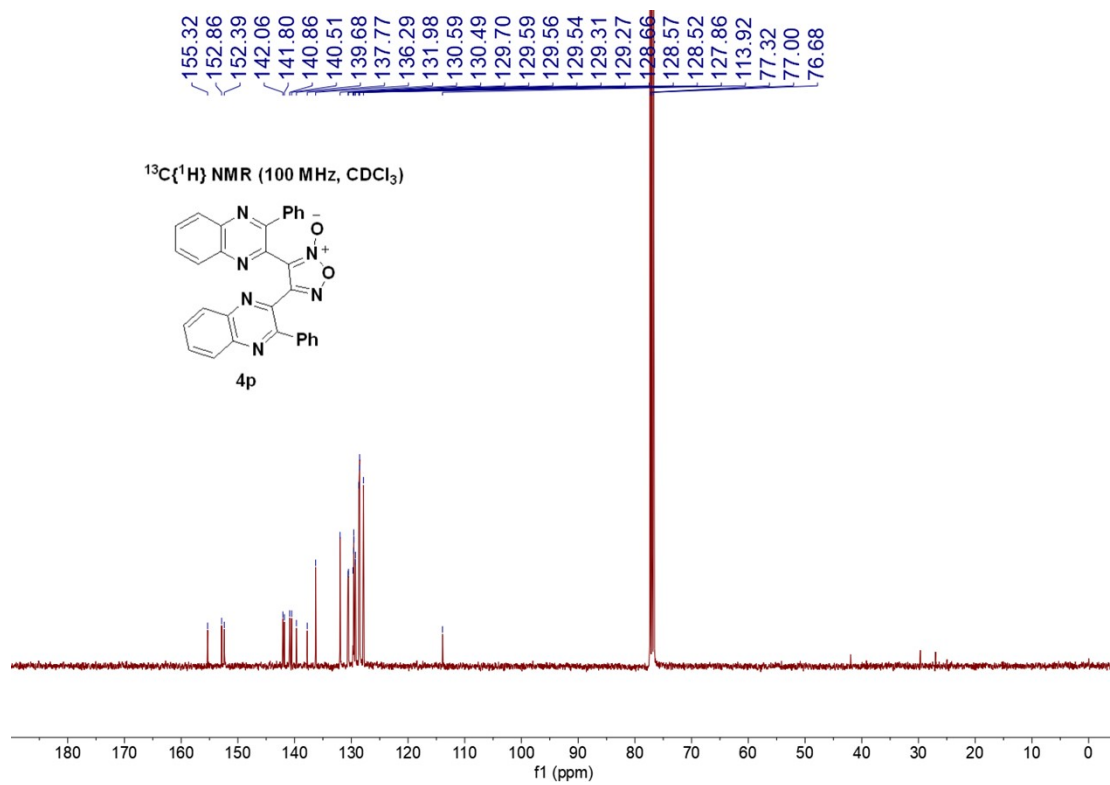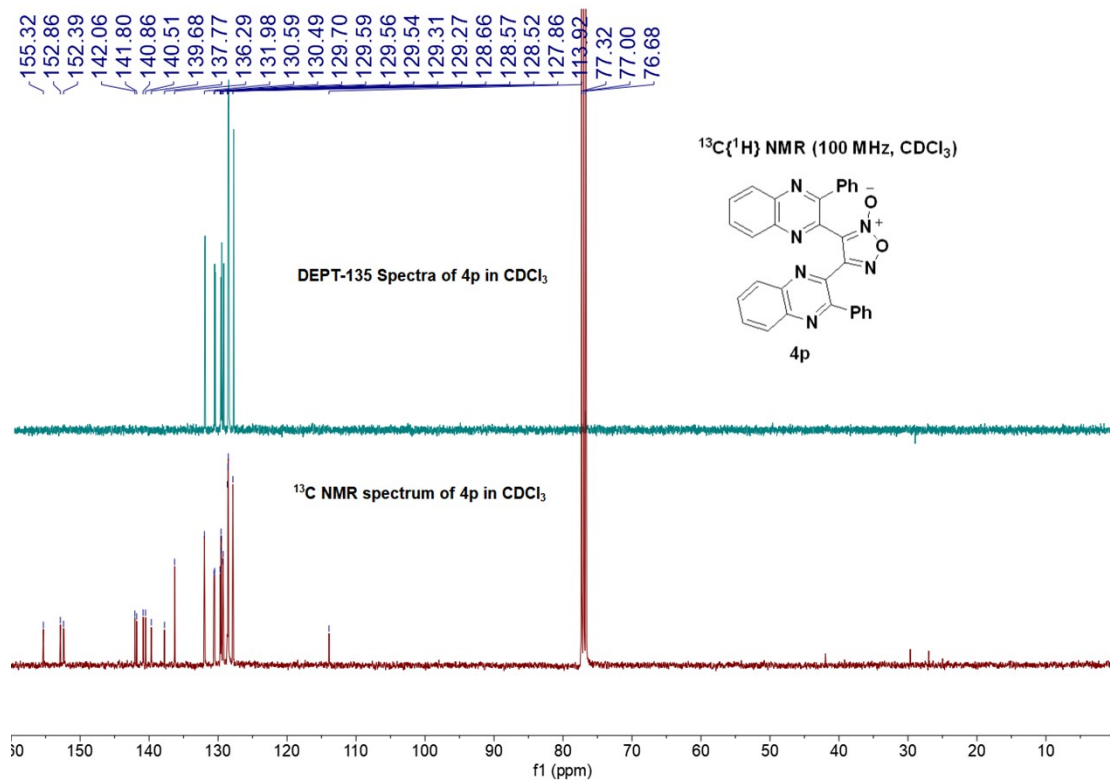

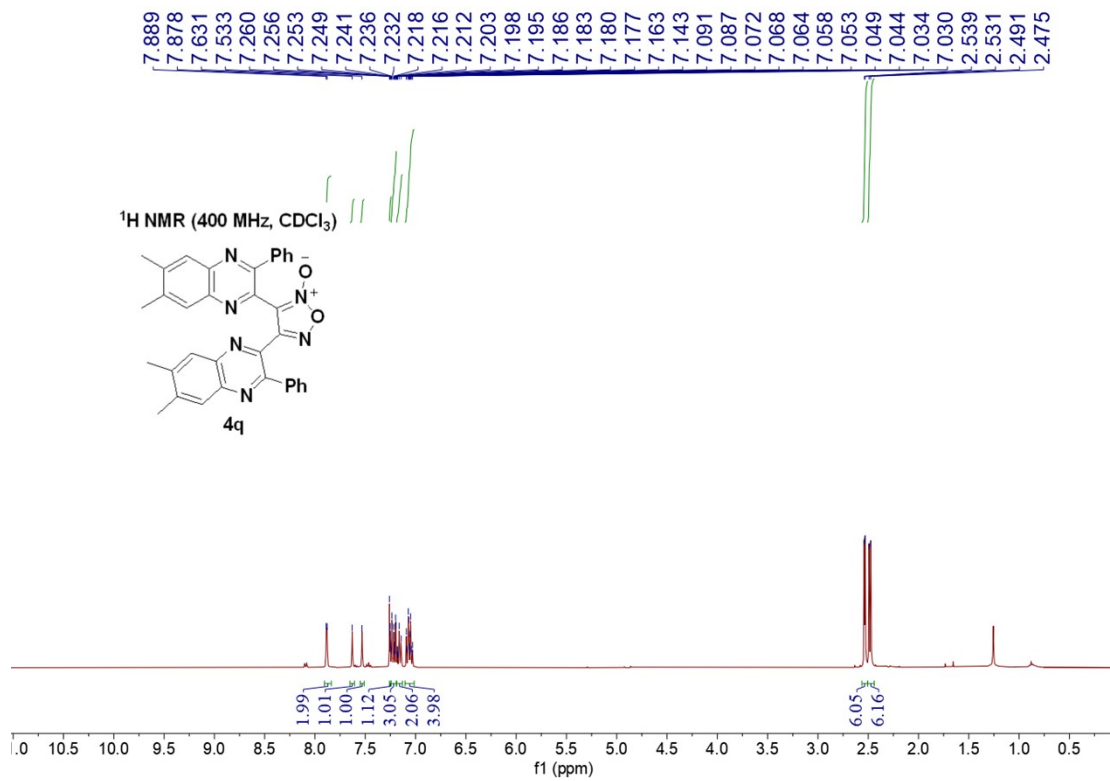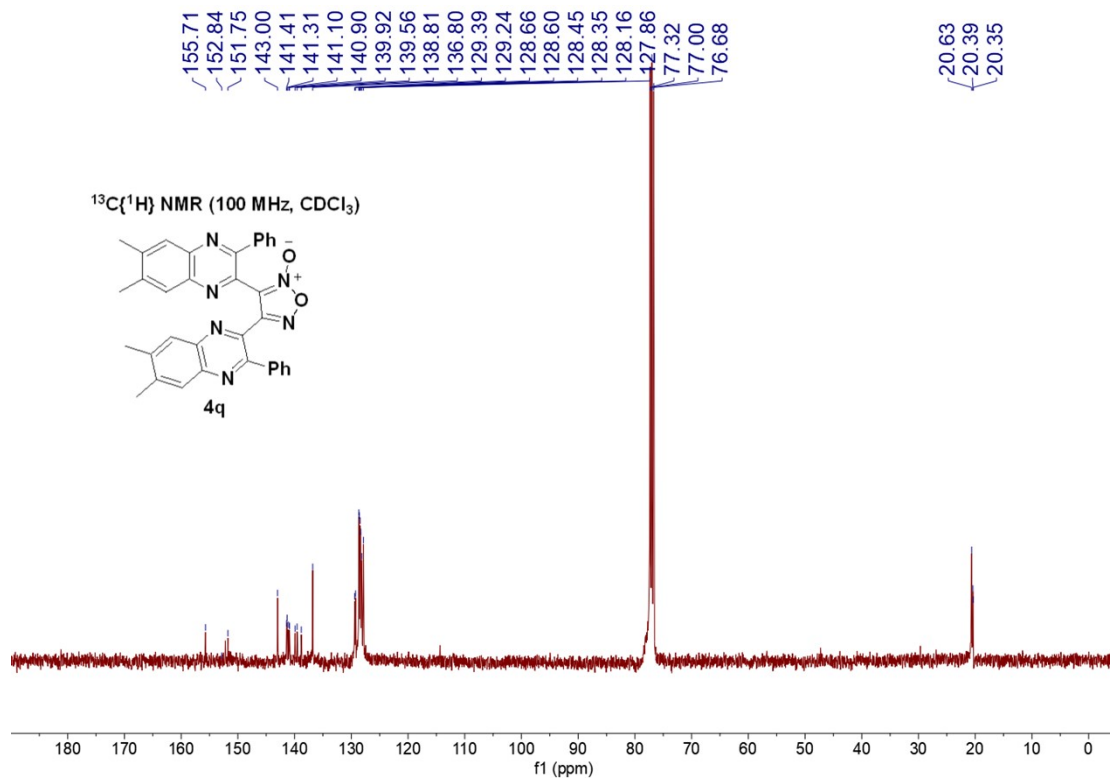

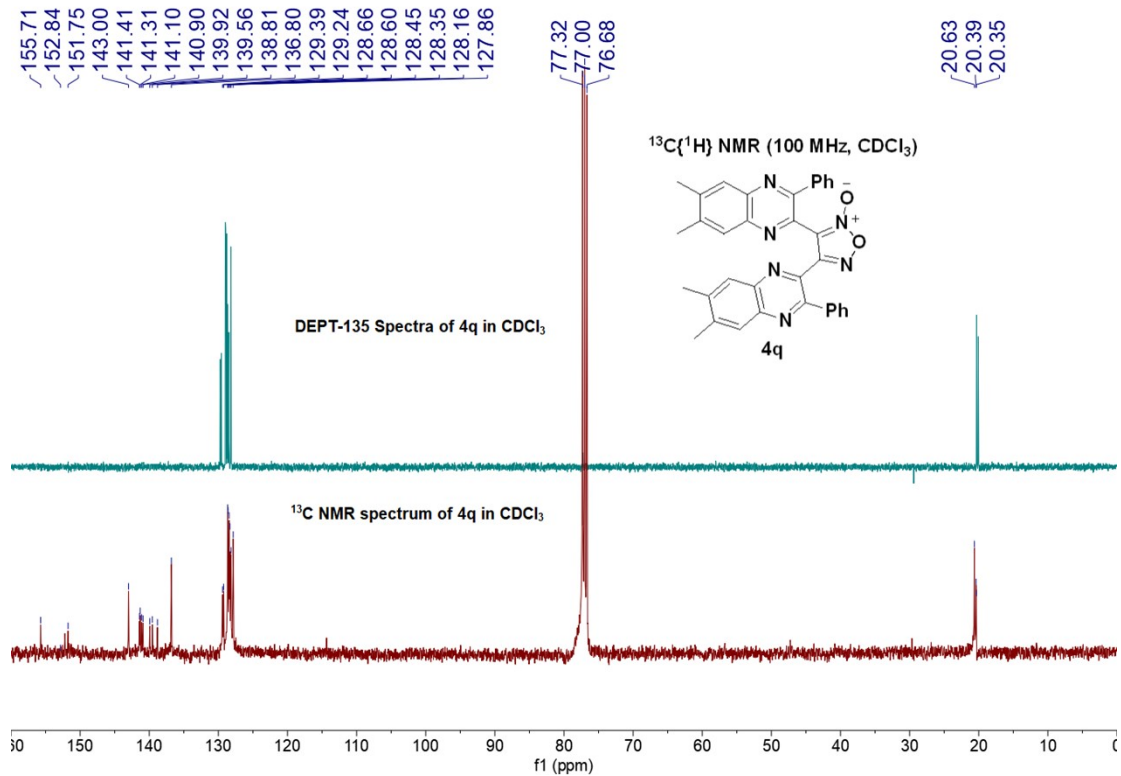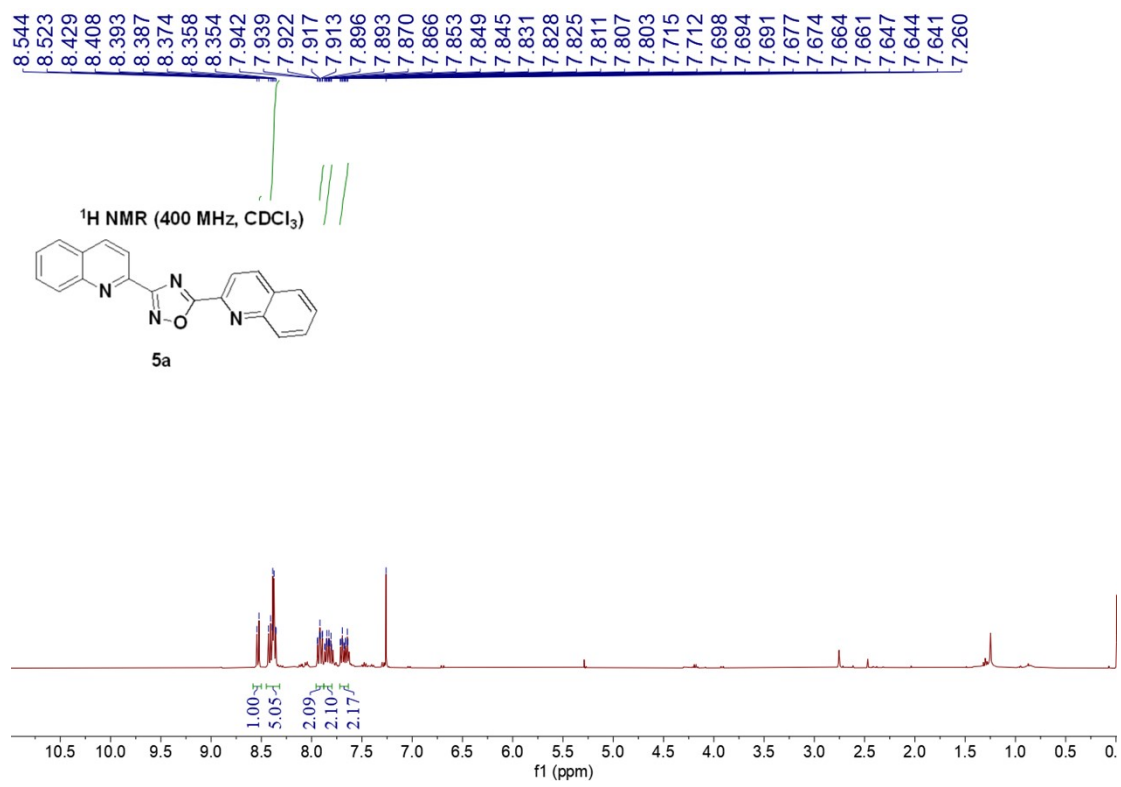

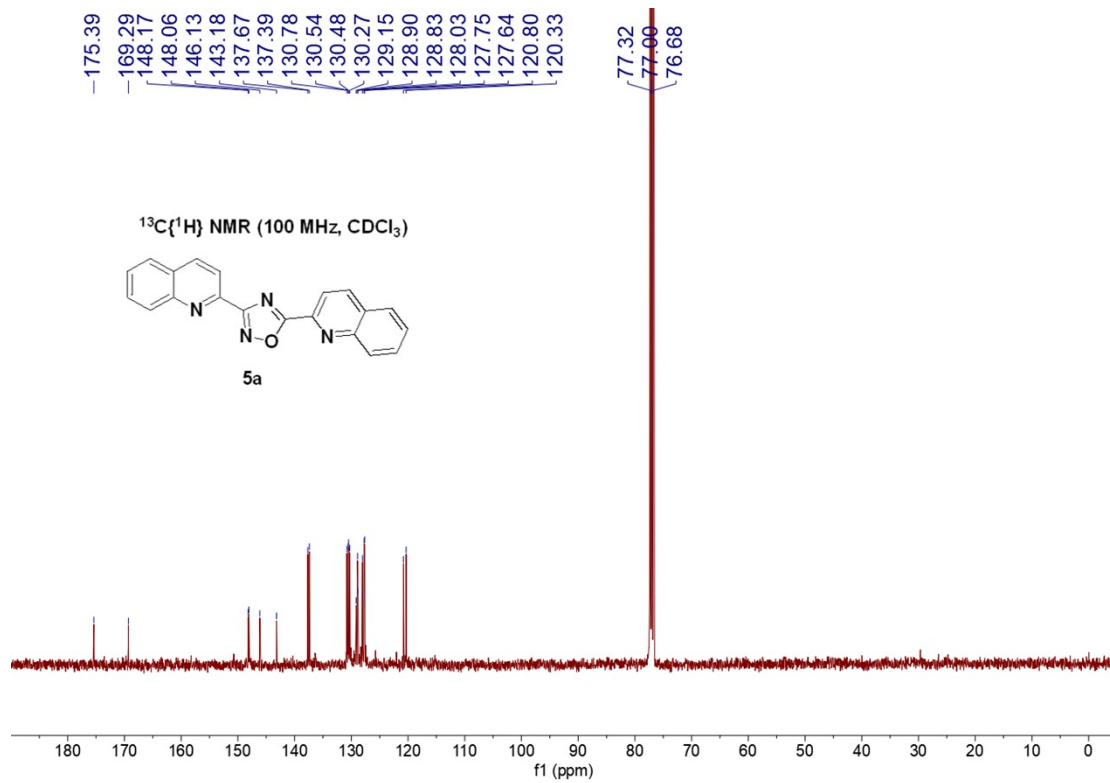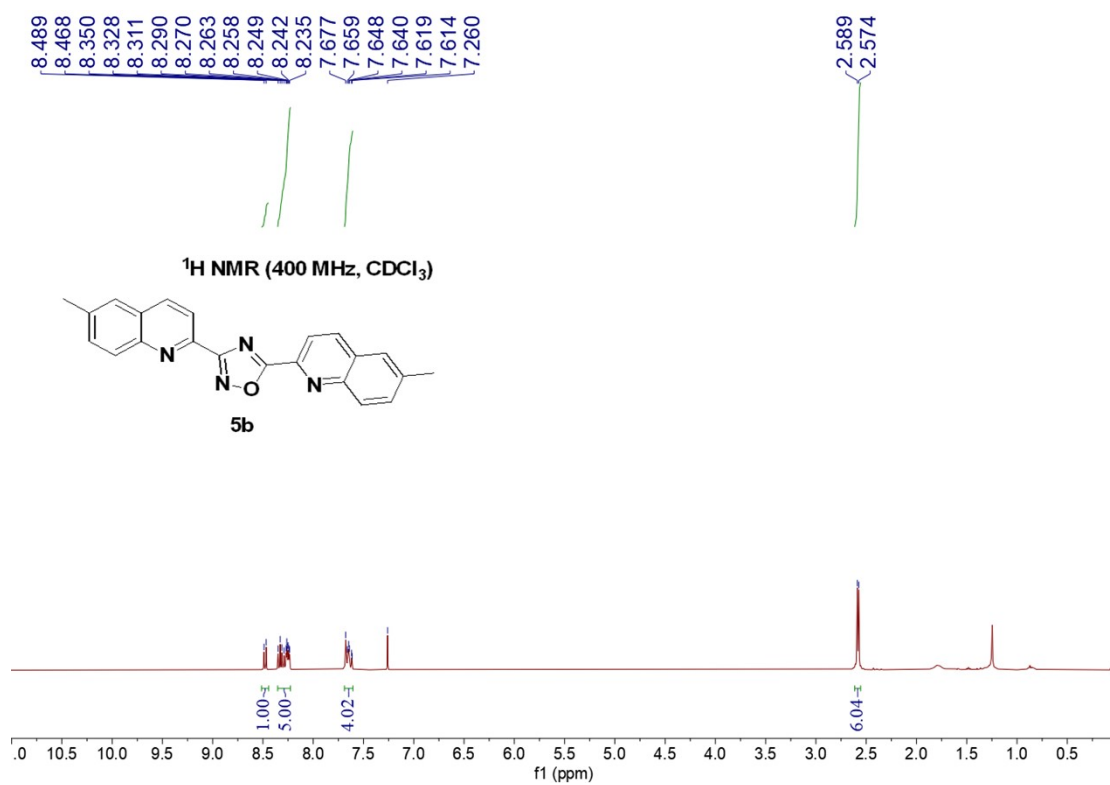

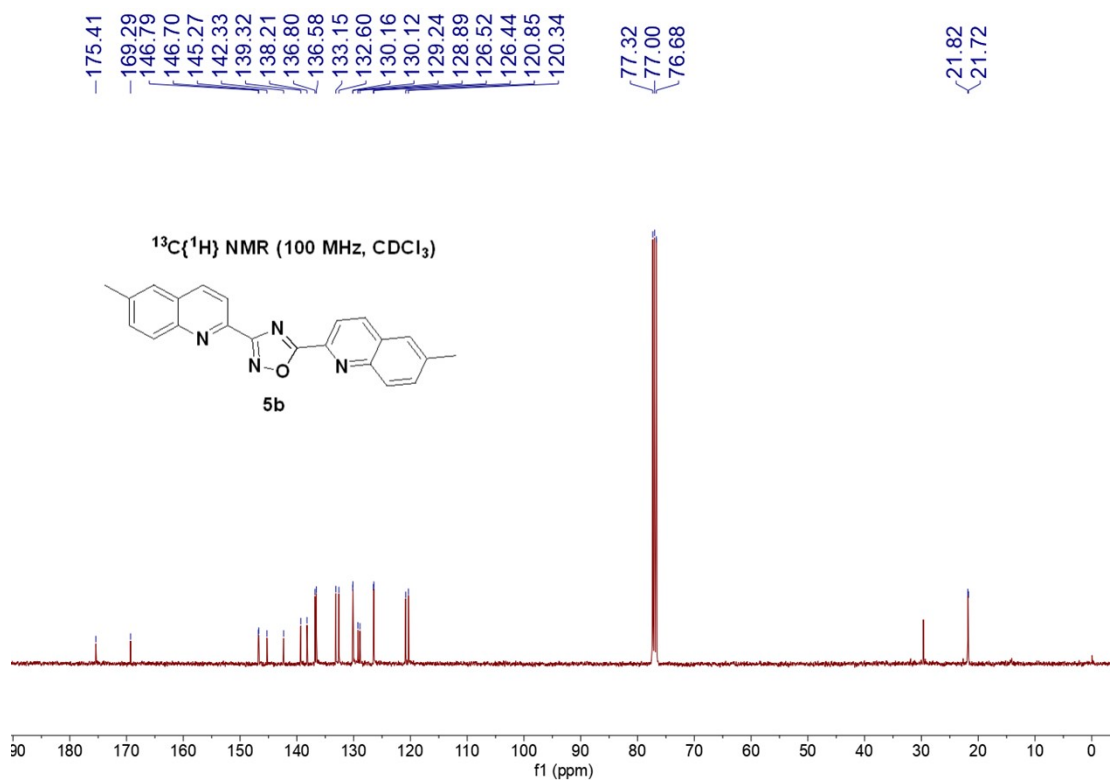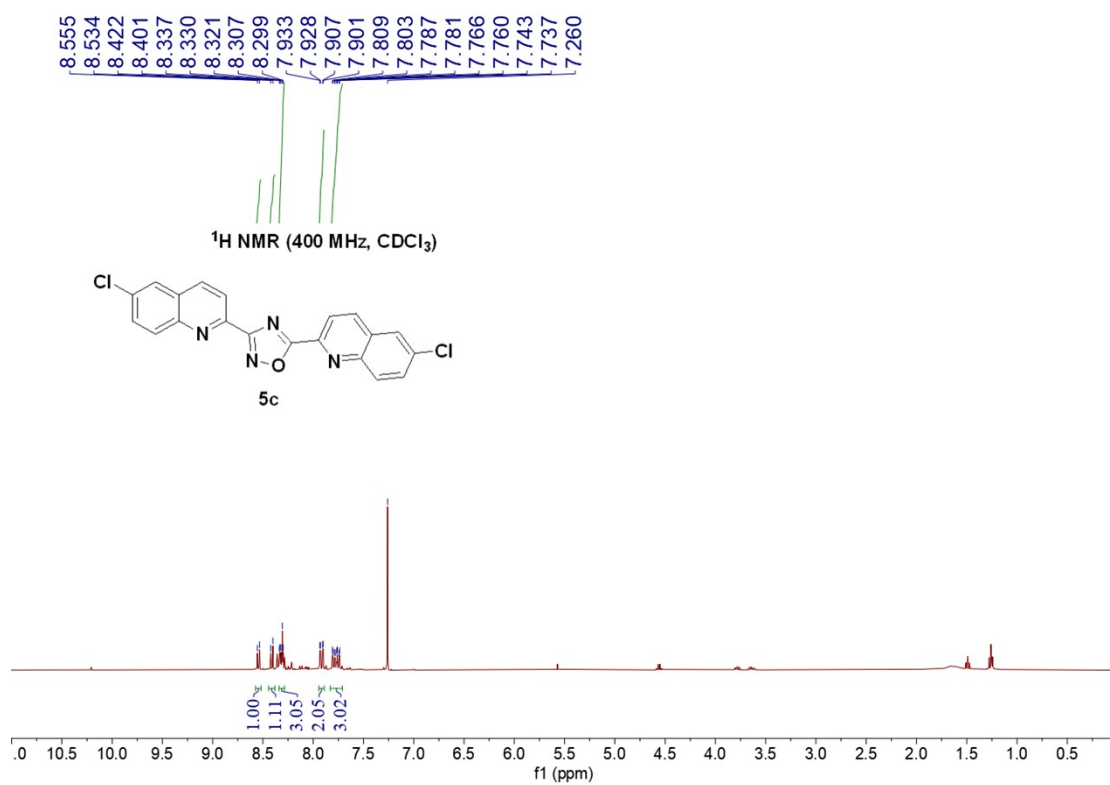

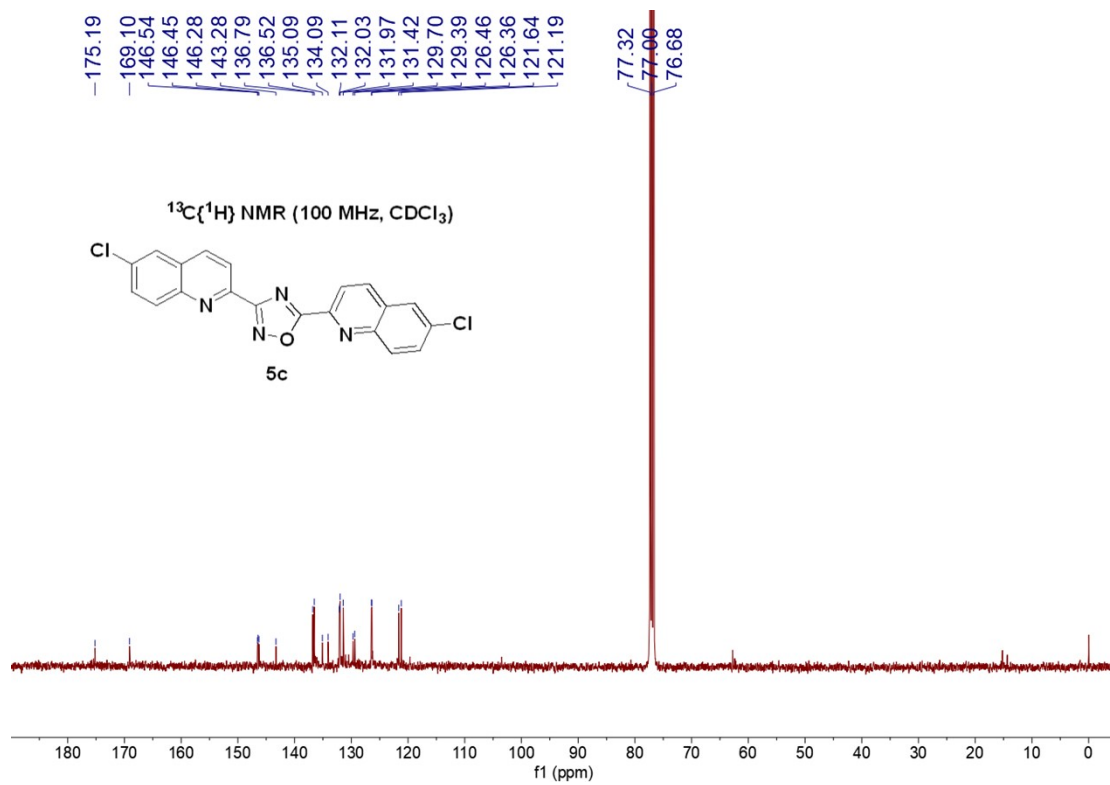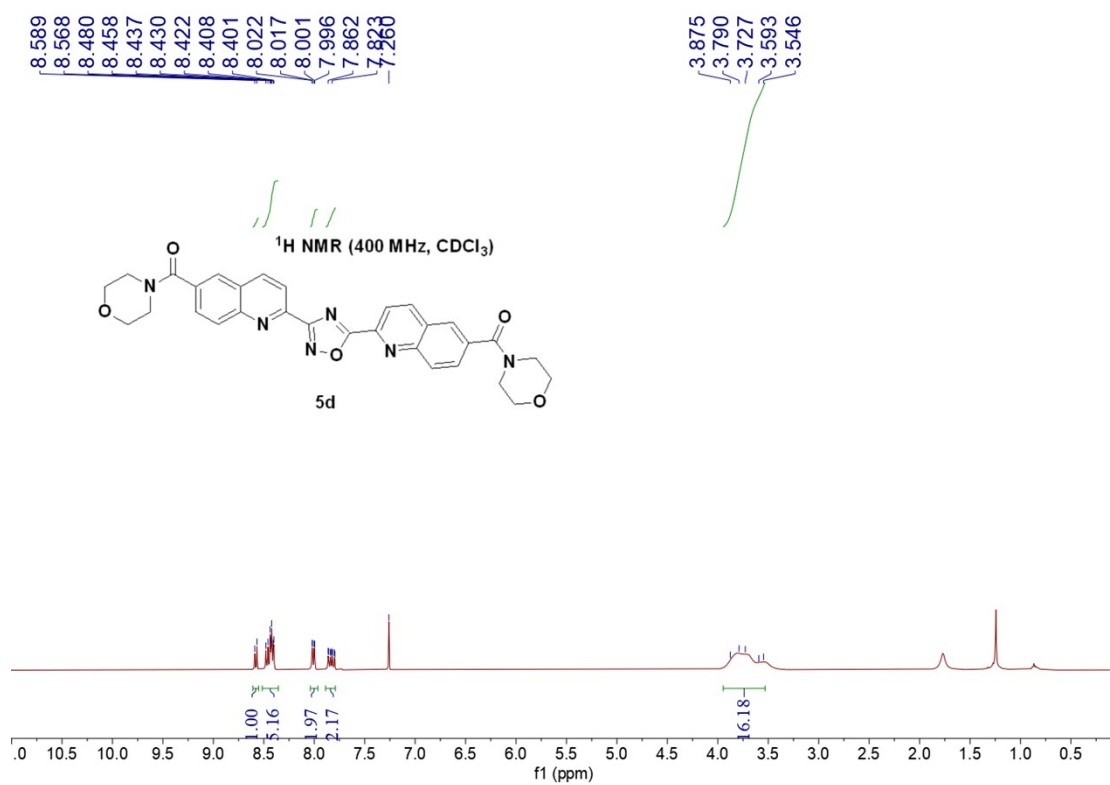



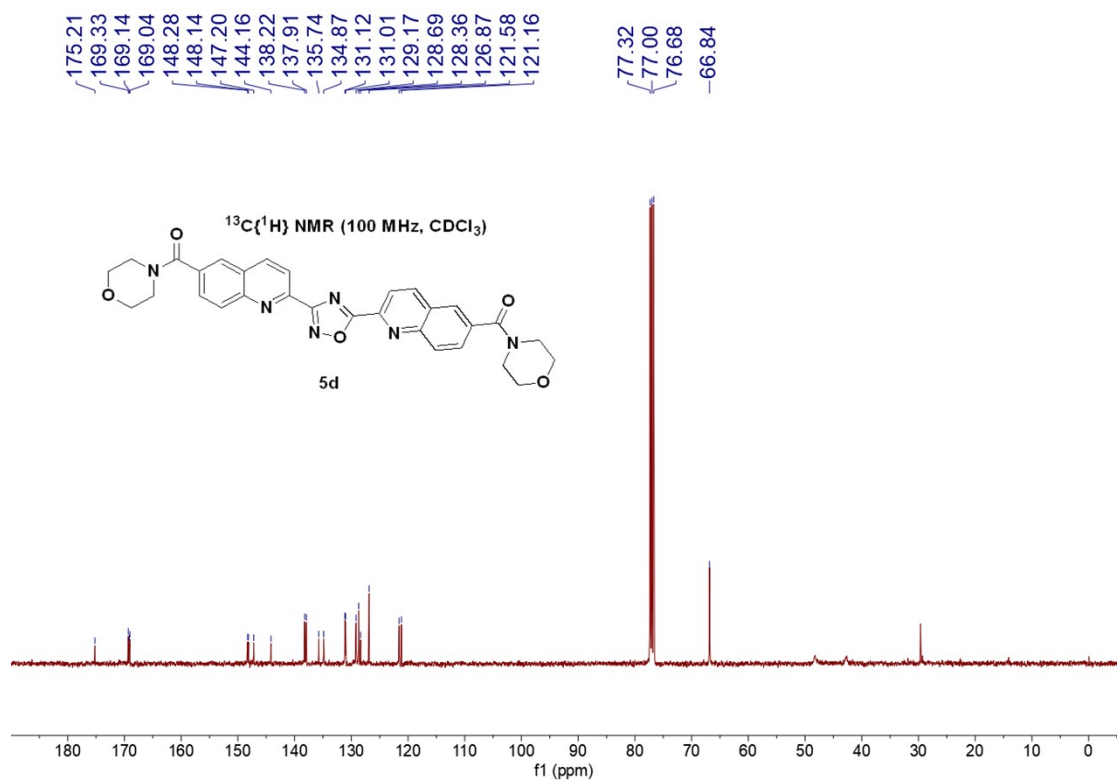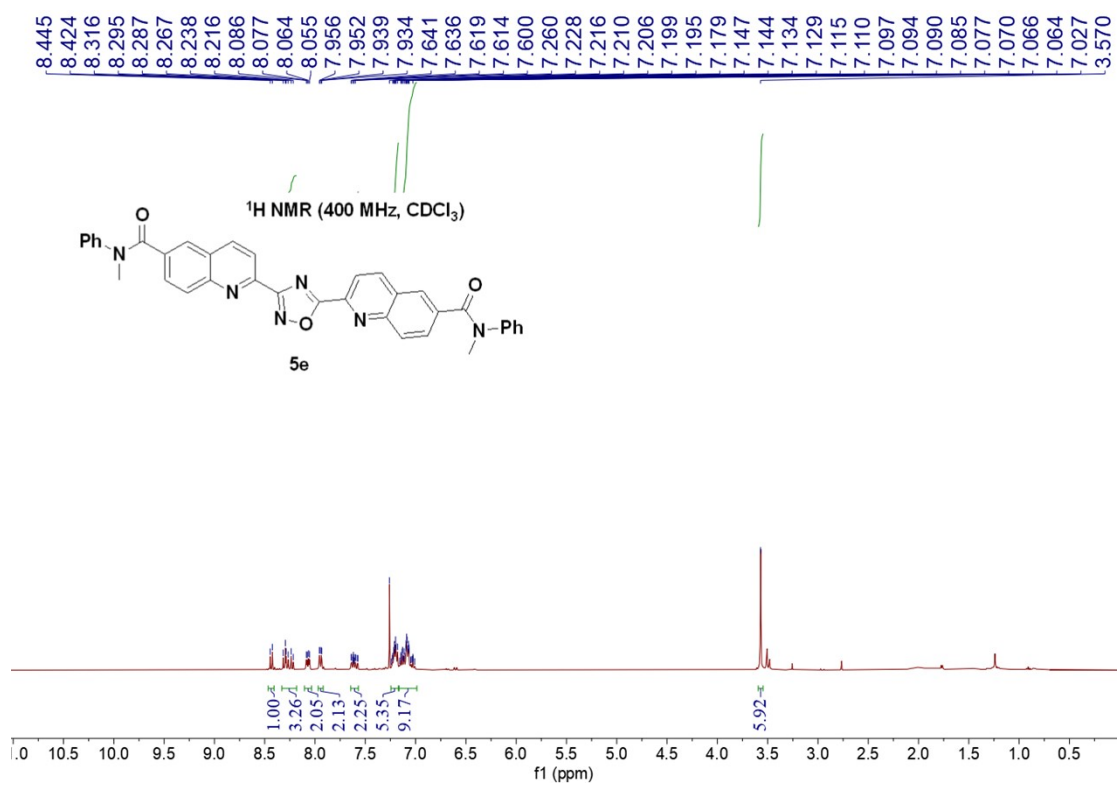

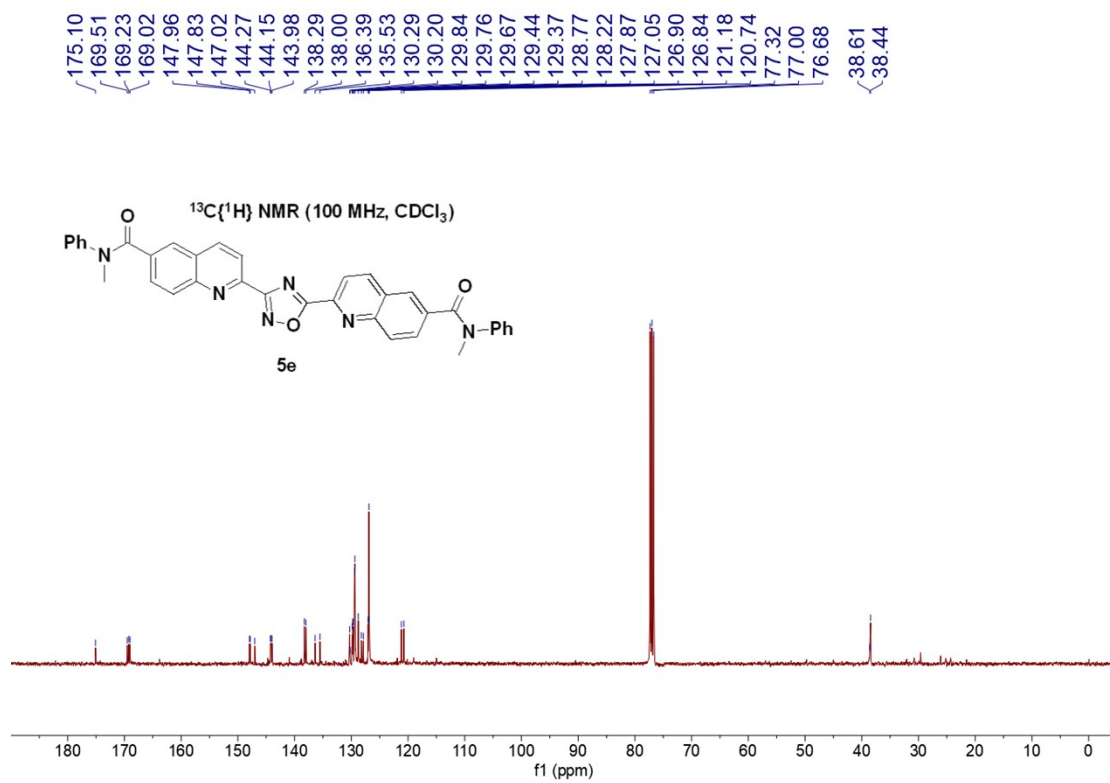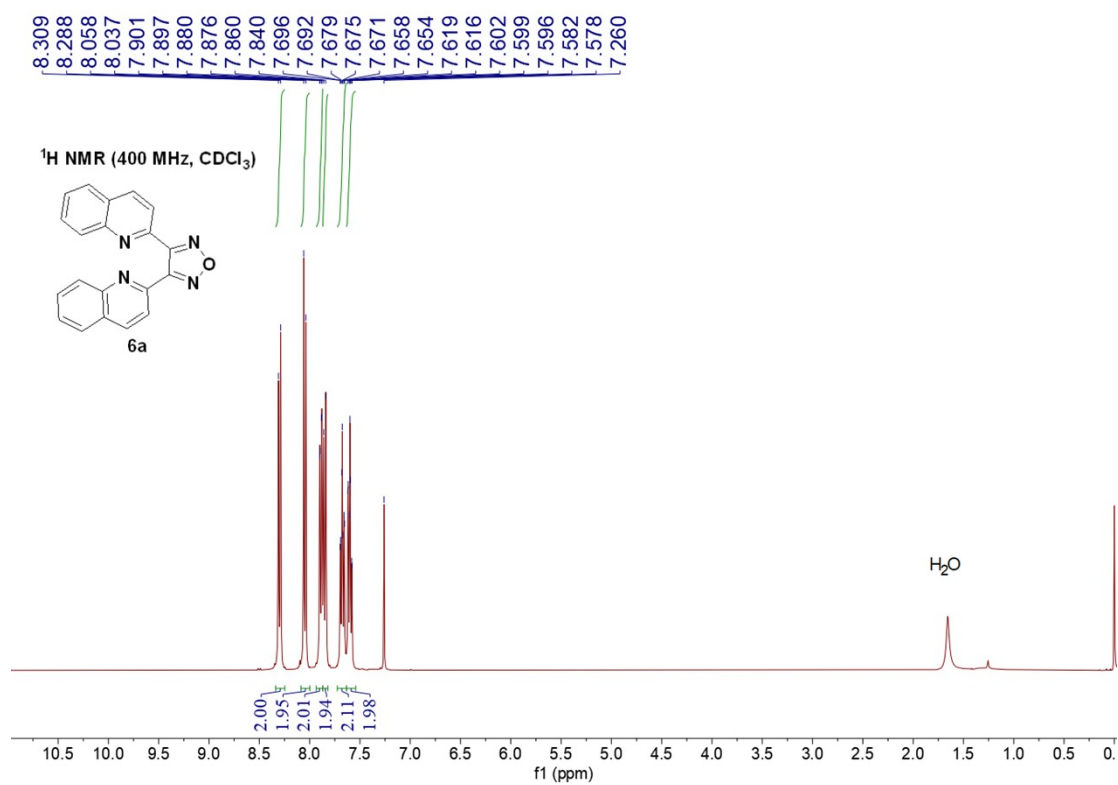

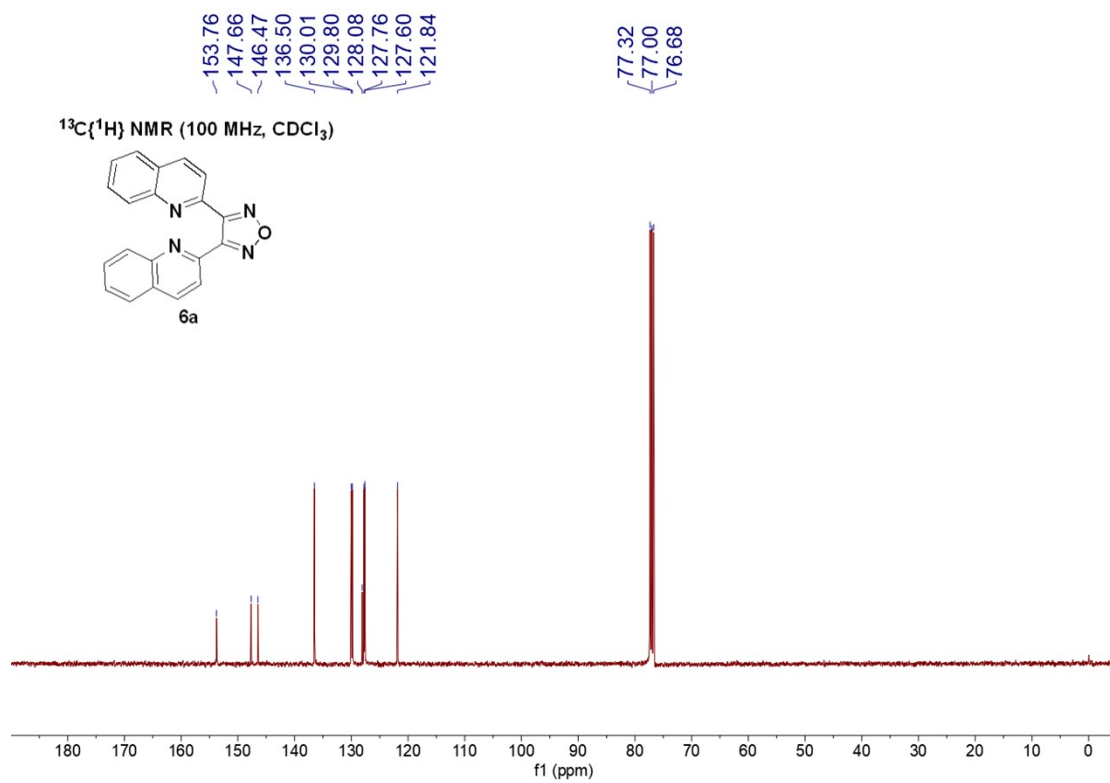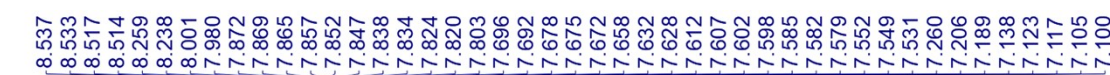

<sup>1</sup>H NMR (400 MHz, CDCl<sub>3</sub>)

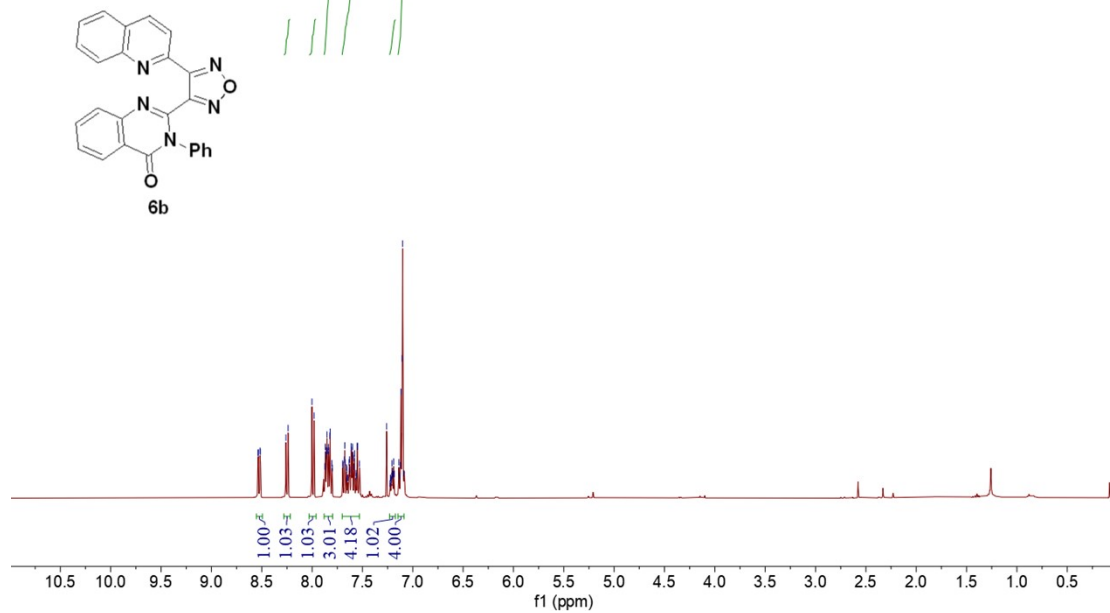

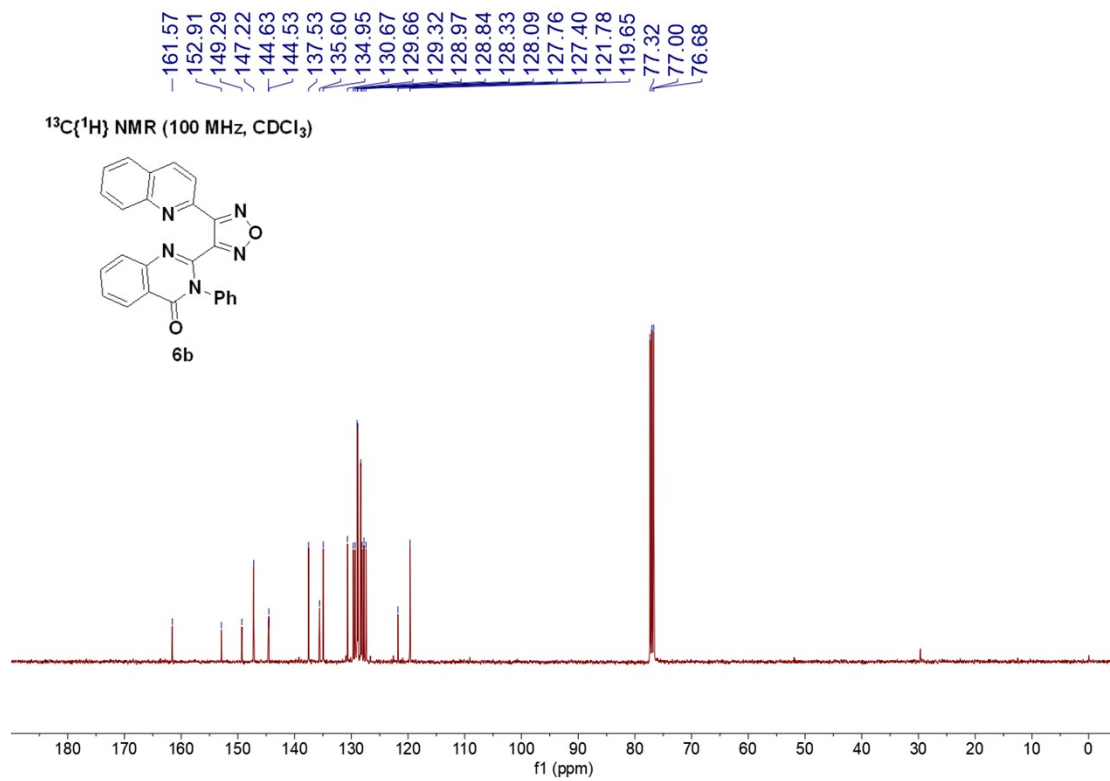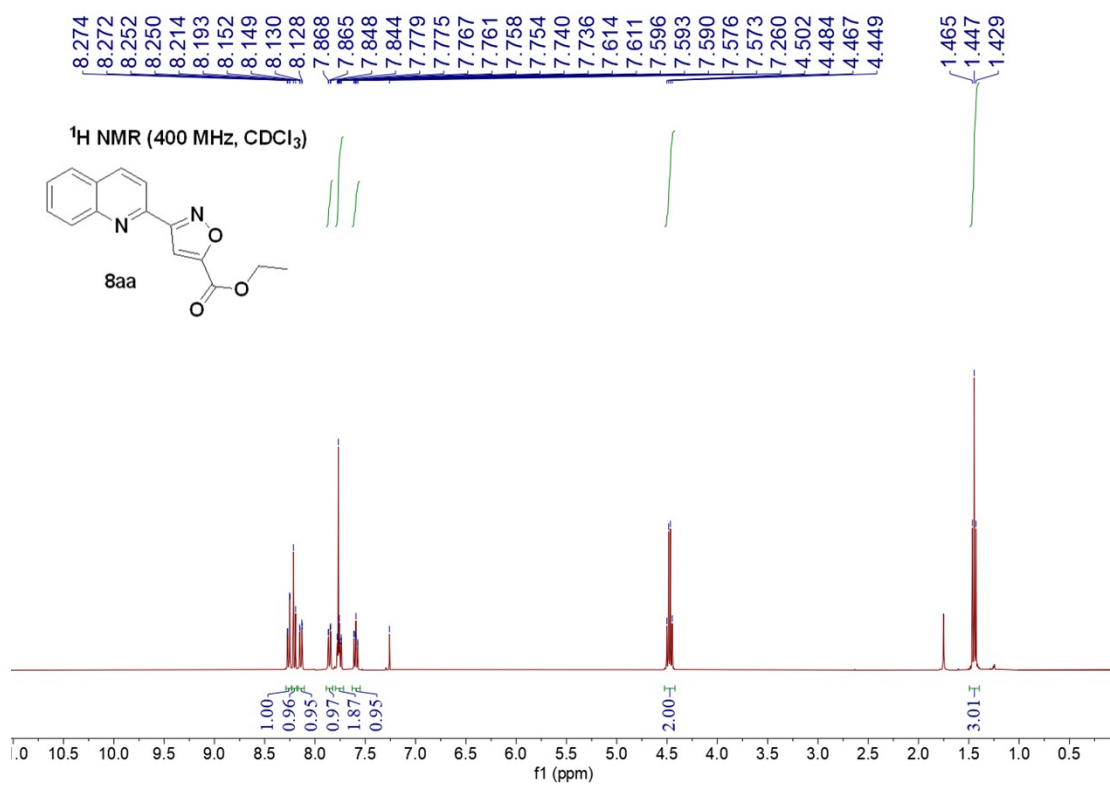

164.17  
160.94  
156.78  
147.98  
147.47  
137.08  
130.08  
129.78  
128.46  
127.70  
127.58  
118.88  
108.57  
77.32  
77.00  
76.68  
62.29  
14.13

$^{13}\text{C}\{^1\text{H}\}$  NMR (100 MHz,  $\text{CDCl}_3$ )

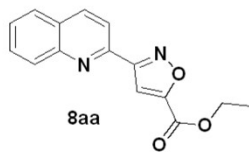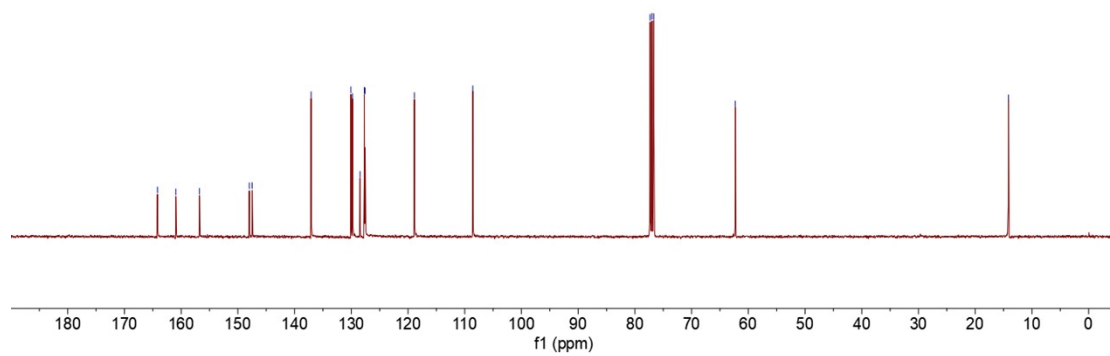

Supplement: d1qo01872h1.pdf [file d1qo01872h1.pdf]
